# Supplementary material for: Feature Selection and Molecular Classification of Cancer Phenotypes: A Comparative Study
Source: MDPI journal article supplement (doi:10.3390/ijms23169087), 2022-08-13
Supplement: s1 [file s1]

## Supplementary Figures

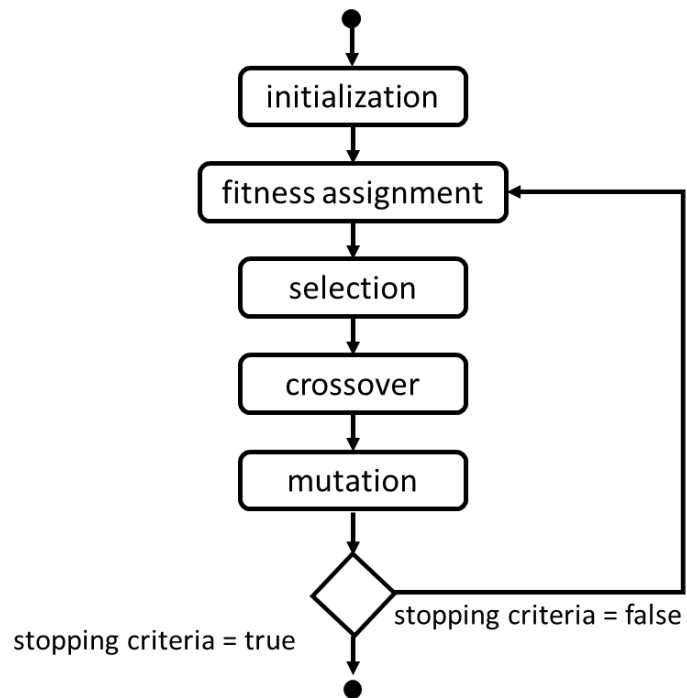

**Supplementary Figure S1.** Pipeline employed in Genetic Algorithms for feature selection.

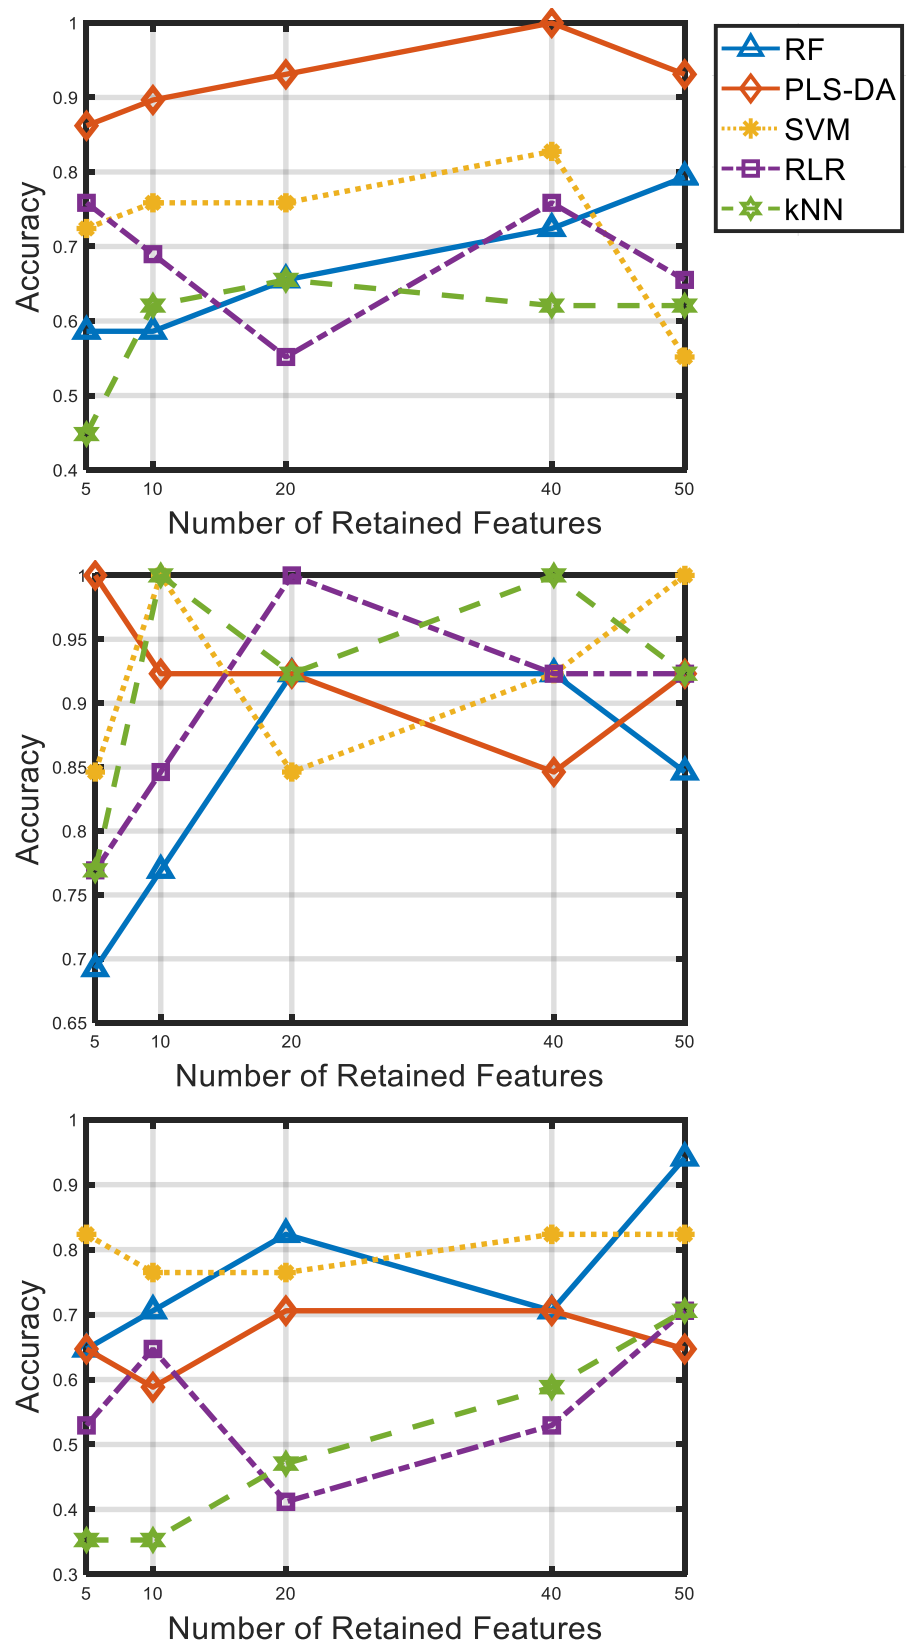

**Supplementary Figure S2.** Predictive accuracy of RF, PLS-DA, SVM, RLR/RMR and kNN vs Number of Retained Features (5, 10, 20, 40, 50) on: (top) SMK\_CAN\_187, (mid) GLI\_85, (bottom) CLL\_SUB\_111 using GA-based wrappers for feature selection. Population Size = 200; maximum number of generations = 150. Each point corresponds to a single value for the predictive accuracy.

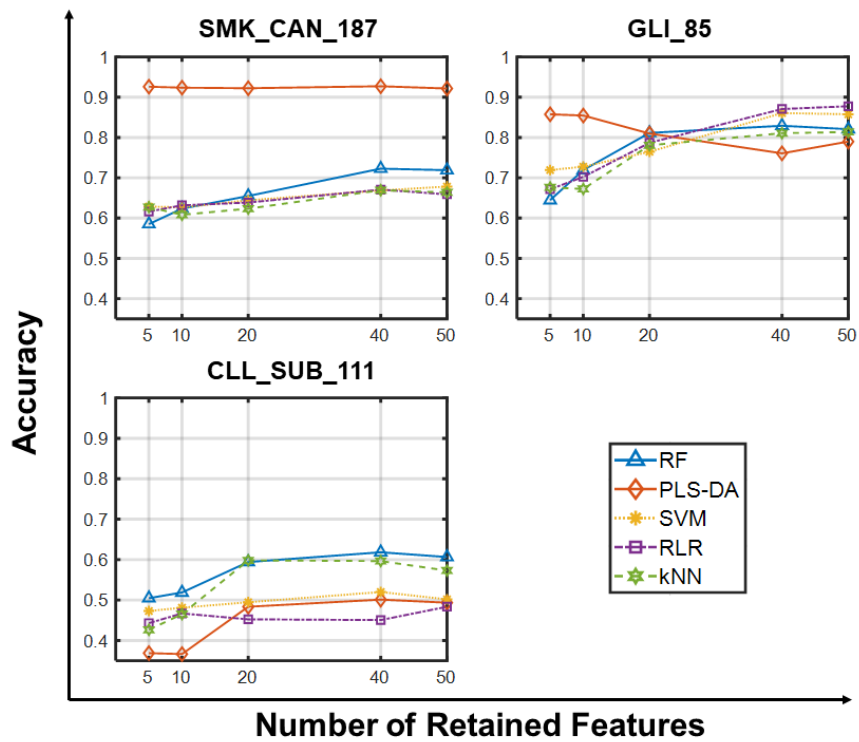

**Supplementary Figure S3.** Predictive accuracy of RF, PLS-DA, SVM, RLR/RMR and kNN vs Number of Retained Features on SMK\_CAN\_187, GLI\_85, CLL\_SUB\_111 selecting 5, 10, 20, 40, 50 most variable genes. Each point is the average predictive accuracy computed over 100 resamplings.

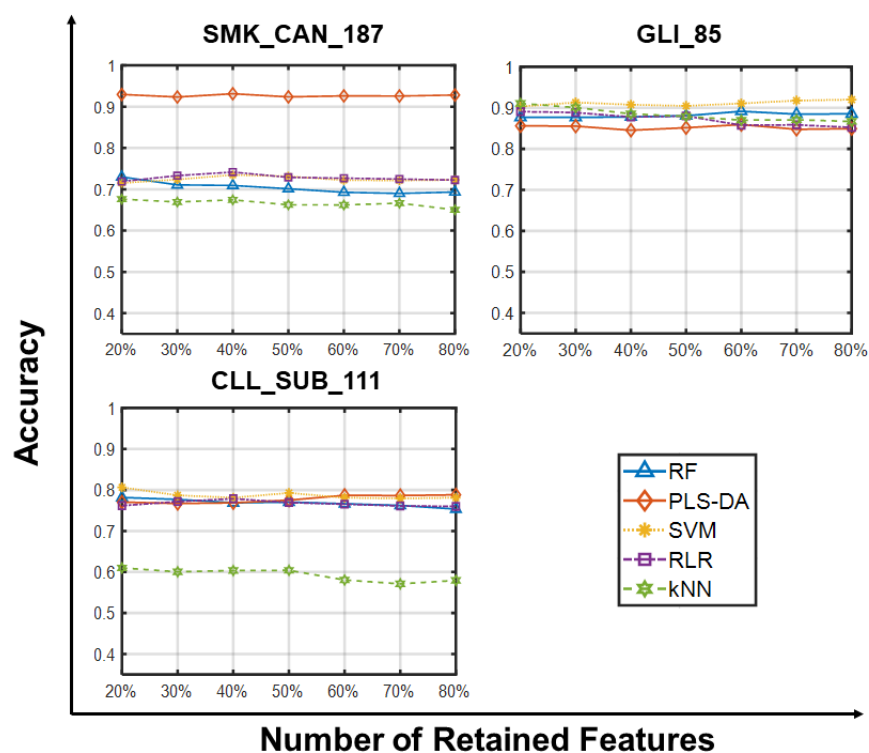

**Supplementary Figure S4.** Predictive accuracy of RF, PLS-DA, SVM, RLR/RMR and kNN vs Number of Retained Features on SMK\_CAN\_187, GLI\_85, CLL\_SUB\_111 selecting the 20%, 30%, 40%, 50%, 60%, 70%, 80% of the genes sorted by variance. Each point is the average predictive accuracy computed over 100 resamplings.
