# Supplementary material for: Feature Selection and Molecular Classification of Cancer Phenotypes: A Comparative Study
Source: MDPI journal article supplement (doi:10.3390/ijms23169087), 2022-08-13
Supplement: s1 [file s1]

## Rsp100\_Biomarkers\_SMK\_CAN\_187

| mRMR        |                      |                               |                      |                      |                      |
|-------------|----------------------|-------------------------------|----------------------|----------------------|----------------------|
| Accuracy    |                      | mean accuracy $\pm$ 95% CI    |                      |                      |                      |
| Classifier  | 5                    | 10                            | 20                   | 40                   | 50                   |
| 'RF'        | '68.69% $\pm$ 1.65%' | '68.69% $\pm$ 1.76%'          | '69.1% $\pm$ 1.67%'  | '69.17% $\pm$ 1.64%' | '69.17% $\pm$ 1.49%' |
| 'PLS-DA'    | '92.21% $\pm$ 1.03%' | '92.21% $\pm$ 1.19%'          | '92.07% $\pm$ 1.03%' | '93.14% $\pm$ 1.13%' | '92% $\pm$ 1.12%'    |
| 'SVM'       | '69.31% $\pm$ 1.55%' | '69.66% $\pm$ 1.81%'          | '68.86% $\pm$ 1.66%' | '69.83% $\pm$ 1.59%' | '69.76% $\pm$ 1.57%' |
| 'RLR'       | '69.24% $\pm$ 1.6%'  | '68.24% $\pm$ 1.77%'          | '67.62% $\pm$ 1.78%' | '69.1% $\pm$ 1.67%'  | '68.45% $\pm$ 1.64%' |
| 'kNN'       | '68.83% $\pm$ 1.51%' | '67.72% $\pm$ 1.58%'          | '67.93% $\pm$ 1.62%' | '68.86% $\pm$ 1.6%'  | '68.48% $\pm$ 1.4%'  |
| Recall      |                      | mean recall $\pm$ 95% CI      |                      |                      |                      |
| Classifier  | 5                    | 10                            | 20                   | 40                   | 50                   |
| 'RF'        | '66.51% $\pm$ 2.51%' | '64.33% $\pm$ 2.73%'          | '63.86% $\pm$ 2.82%' | '61.99% $\pm$ 2.63%' | '61.82% $\pm$ 2.63%' |
| 'PLS-DA'    | '93.71% $\pm$ 2%'    | '92.6% $\pm$ 2.27%'           | '90.25% $\pm$ 2.4%'  | '91.46% $\pm$ 2.44%' | '89.59% $\pm$ 2.62%' |
| 'SVM'       | '64.42% $\pm$ 2.67%' | '61.8% $\pm$ 2.8%'            | '61.19% $\pm$ 2.62%' | '62.03% $\pm$ 2.82%' | '61.61% $\pm$ 2.92%' |
| 'RLR'       | '66.95% $\pm$ 2.54%' | '66.09% $\pm$ 2.65%'          | '64.77% $\pm$ 2.69%' | '66.34% $\pm$ 2.45%' | '65.47% $\pm$ 2.51%' |
| 'kNN'       | '65.34% $\pm$ 2.47%' | '62.57% $\pm$ 2.46%'          | '62.39% $\pm$ 2.46%' | '58.68% $\pm$ 2.35%' | '57.13% $\pm$ 2.3%'  |
| Precision   |                      | mean precision $\pm$ 95% CI   |                      |                      |                      |
| Classifier  | 5                    | 10                            | 20                   | 40                   | 50                   |
| 'RF'        | '67.4% $\pm$ 2.15%'  | '68.13% $\pm$ 2.31%'          | '69.35% $\pm$ 2.37%' | '69.78% $\pm$ 2.21%' | '70.11% $\pm$ 2.2%'  |
| 'PLS-DA'    | '91.58% $\pm$ 1.83%' | '92.65% $\pm$ 1.89%'          | '94.05% $\pm$ 1.69%' | '94.86% $\pm$ 1.58%' | '94.46% $\pm$ 1.63%' |
| 'SVM'       | '68.82% $\pm$ 2.23%' | '71.02% $\pm$ 2.56%'          | '70.07% $\pm$ 2.4%'  | '71.02% $\pm$ 2.21%' | '70.81% $\pm$ 2.14%' |
| 'RLR'       | '67.71% $\pm$ 2.09%' | '66.82% $\pm$ 2.25%'          | '66.19% $\pm$ 2.17%' | '67.91% $\pm$ 2.22%' | '67.21% $\pm$ 2.16%' |
| 'kNN'       | '67.83% $\pm$ 1.94%' | '67.22% $\pm$ 2.08%'          | '67.49% $\pm$ 2.26%' | '70.56% $\pm$ 2.32%' | '70.29% $\pm$ 2.05%' |
| Specificity |                      | mean specificity $\pm$ 95% CI |                      |                      |                      |
| Classifier  | 5                    | 10                            | 20                   | 40                   | 50                   |
| 'RF'        | '70.59% $\pm$ 2.58%' | '72.46% $\pm$ 2.54%'          | '73.75% $\pm$ 2.67%' | '75.4% $\pm$ 2.47%'  | '75.51% $\pm$ 2.4%'  |
| 'PLS-DA'    | '90.87% $\pm$ 2.14%' | '91.8% $\pm$ 2.29%'           | '93.72% $\pm$ 1.84%' | '94.63% $\pm$ 1.75%' | '94.03% $\pm$ 1.85%' |
| 'SVM'       | '73.51% $\pm$ 2.26%' | '76.47% $\pm$ 2.67%'          | '75.57% $\pm$ 2.54%' | '76.62% $\pm$ 2.32%' | '76.8% $\pm$ 2.31%'  |
| 'RLR'       | '71.19% $\pm$ 2.36%' | '70.05% $\pm$ 2.68%'          | '70.09% $\pm$ 2.5%'  | '71.47% $\pm$ 2.45%' | '71.01% $\pm$ 2.47%' |
| 'kNN'       | '71.76% $\pm$ 2.51%' | '72.16% $\pm$ 2.42%'          | '72.72% $\pm$ 2.37%' | '77.67% $\pm$ 2.29%' | '78.3% $\pm$ 1.9%'   |
| NPV         |                      | mean NPV $\pm$ 95% CI         |                      |                      |                      |
| Classifier  | 5                    | 10                            | 20                   | 40                   | 50                   |
| 'RF'        | '71.17% $\pm$ 1.66%' | '70.53% $\pm$ 1.79%'          | '70.71% $\pm$ 1.7%'  | '69.9% $\pm$ 1.57%'  | '69.9% $\pm$ 1.5%'   |
| 'PLS-DA'    | '95.4% $\pm$ 1.41%'  | '94.67% $\pm$ 1.55%'          | '92.96% $\pm$ 1.66%' | '93.9% $\pm$ 1.62%'  | '92.67% $\pm$ 1.76%' |
| 'SVM'       | '71.03% $\pm$ 1.59%' | '70.12% $\pm$ 1.7%'           | '69.52% $\pm$ 1.66%' | '70.44% $\pm$ 1.6%'  | '70.37% $\pm$ 1.59%' |
| 'RLR'       | '71.82% $\pm$ 1.66%' | '70.83% $\pm$ 1.8%'           | '70.11% $\pm$ 1.87%' | '71.32% $\pm$ 1.61%' | '70.69% $\pm$ 1.64%' |
| 'kNN'       | '70.85% $\pm$ 1.5%'  | '69.22% $\pm$ 1.59%'          | '69.31% $\pm$ 1.55%' | '68.53% $\pm$ 1.42%' | '68.03% $\pm$ 1.27%' |
| F1          |                      | mean F1 $\pm$ 95% CI          |                      |                      |                      |
| Classifier  | 5                    | 10                            | 20                   | 40                   | 50                   |

|          |                  |                  |                  |                  |                  |
|----------|------------------|------------------|------------------|------------------|------------------|
| 'RF'     | '66.13% ± 1.89%' | '65.28% ± 2.07%' | '65.33% ± 2.02%' | '64.77% ± 2.04%' | '64.62% ± 1.92%' |
| 'PLS-DA' | '91.79% ± 1.1%'  | '91.64% ± 1.32%' | '91.13% ± 1.24%' | '92.22% ± 1.43%' | '90.9% ± 1.39%'  |
| 'SVM'    | '65.67% ± 1.98%' | '65.04% ± 2.21%' | '64.28% ± 1.96%' | '65.08% ± 2.14%' | '64.78% ± 2.2%'  |
| 'RLR'    | '66.63% ± 1.88%' | '65.66% ± 2.01%' | '64.73% ± 2.01%' | '66.43% ± 1.91%' | '65.63% ± 1.92%' |
| 'kNN'    | '65.79% ± 1.78%' | '64.02% ± 1.84%' | '64.11% ± 1.94%' | '63.38% ± 2.01%' | '62.4% ± 1.88%'  |

#### Relief-F

Accuracy mean accuracy ± 95% CI

| Classifier | 5                | 10               | 20               | 40               | 50               |
|------------|------------------|------------------|------------------|------------------|------------------|
| 'RF'       | '63.55% ± 1.61%' | '67.17% ± 1.37%' | '67.93% ± 1.58%' | '66.9% ± 1.46%'  | '67.45% ± 1.59%' |
| 'PLS-DA'   | '92.14% ± 1.16%' | '92.66% ± 1.13%' | '92.97% ± 1.05%' | '93.59% ± 1.07%' | '93.69% ± 1.08%' |
| 'SVM'      | '67.34% ± 1.72%' | '67.41% ± 1.66%' | '68.41% ± 1.61%' | '67.55% ± 1.64%' | '67.83% ± 1.66%' |
| 'RLR'      | '67.66% ± 1.66%' | '67.83% ± 1.62%' | '68.38% ± 1.59%' | '68.52% ± 1.58%' | '69.34% ± 1.7%'  |
| 'kNN'      | '65.48% ± 1.79%' | '67.31% ± 1.57%' | '68.9% ± 1.57%'  | '66.86% ± 1.59%' | '67.55% ± 1.62%' |

Recall mean recall ± 95% CI

| Classifier | 5                | 10               | 20               | 40               | 50               |
|------------|------------------|------------------|------------------|------------------|------------------|
| 'RF'       | '60.42% ± 2.42%' | '61.45% ± 2.38%' | '61.24% ± 2.58%' | '57.82% ± 2.49%' | '58.63% ± 2.65%' |
| 'PLS-DA'   | '94.44% ± 1.92%' | '93.01% ± 2.32%' | '93.53% ± 2.02%' | '93.08% ± 1.91%' | '94.23% ± 1.87%' |
| 'SVM'      | '62.74% ± 2.6%'  | '59.77% ± 2.65%' | '60.14% ± 2.56%' | '56.81% ± 2.82%' | '58.07% ± 2.72%' |
| 'RLR'      | '65.65% ± 2.65%' | '64.65% ± 2.62%' | '65.73% ± 2.56%' | '65.29% ± 2.63%' | '65.73% ± 2.44%' |
| 'kNN'      | '57.64% ± 2.81%' | '57.93% ± 2.33%' | '60.07% ± 2.31%' | '55.77% ± 2.37%' | '57.25% ± 2.27%' |

Precision mean precision ± 95% CI

| Classifier | 5                | 10               | 20               | 40               | 50               |
|------------|------------------|------------------|------------------|------------------|------------------|
| 'RF'       | '61.53% ± 2.05%' | '66.43% ± 1.84%' | '67.6% ± 2.01%'  | '67.37% ± 2.06%' | '67.74% ± 2.17%' |
| 'PLS-DA'   | '91.06% ± 2%'    | '92.84% ± 1.75%' | '92.97% ± 1.73%' | '94.53% ± 1.68%' | '93.76% ± 1.72%' |
| 'SVM'      | '66.27% ± 2.1%'  | '67.59% ± 2.25%' | '69.37% ± 2.32%' | '69.38% ± 2.36%' | '69.18% ± 2.4%'  |
| 'RLR'      | '65.48% ± 1.92%' | '66.42% ± 2.05%' | '66.83% ± 2.01%' | '66.97% ± 1.92%' | '68.17% ± 2.2%'  |
| 'kNN'      | '65.12% ± 2.3%'  | '68.2% ± 2.21%'  | '70.03% ± 2.17%' | '68.55% ± 2.23%' | '68.91% ± 2.34%' |

Specificity mean specificity ± 95% CI

| Classifier | 5                | 10               | 20               | 40               | 50               |
|------------|------------------|------------------|------------------|------------------|------------------|
| 'RF'       | '66.21% ± 2.29%' | '72.14% ± 2.11%' | '73.72% ± 2.09%' | '74.75% ± 2.06%' | '75.03% ± 2.09%' |
| 'PLS-DA'   | '90.12% ± 2.37%' | '92.3% ± 2%'     | '92.43% ± 2.02%' | '94.06% ± 1.98%' | '93.19% ± 2.03%' |
| 'SVM'      | '71.34% ± 2.32%' | '74.06% ± 2.24%' | '75.6% ± 2.41%'  | '76.9% ± 2.47%'  | '76.34% ± 2.39%' |
| 'RLR'      | '69.34% ± 2.22%' | '70.52% ± 2.28%' | '70.63% ± 2.26%' | '71.3% ± 2.13%'  | '72.47% ± 2.21%' |
| 'kNN'      | '72.23% ± 2.33%' | '75.5% ± 2.17%'  | '76.55% ± 2.17%' | '76.58% ± 2.31%' | '76.58% ± 2.16%' |

NPV mean NPV ± 95% CI

| Classifier | 5                | 10               | 20               | 40               | 50               |
|------------|------------------|------------------|------------------|------------------|------------------|
| 'RF'       | '66.06% ± 1.57%' | '68.72% ± 1.4%'  | '69.08% ± 1.62%' | '67.48% ± 1.45%' | '68.07% ± 1.57%' |
| 'PLS-DA'   | '95.93% ± 1.35%' | '95.04% ± 1.54%' | '95.29% ± 1.4%'  | '94.8% ± 1.36%'  | '95.73% ± 1.32%' |
| 'SVM'      | '69.15% ± 1.76%' | '68.35% ± 1.64%' | '68.9% ± 1.51%'  | '67.67% ± 1.59%' | '68.04% ± 1.54%' |
| 'RLR'      | '70.5% ± 1.79%'  | '70.27% ± 1.74%' | '70.96% ± 1.78%' | '70.92% ± 1.76%' | '71.29% ± 1.72%' |

|                    |                           |                  |                  |                  |                  |
|--------------------|---------------------------|------------------|------------------|------------------|------------------|
| 'kNN'              | '66.71% ± 1.75%'          | '67.55% ± 1.39%' | '69.04% ± 1.49%' | '66.71% ± 1.46%' | '67.45% ± 1.46%' |
| <b>F1</b>          | mean F1 ± 95% CI          |                  |                  |                  |                  |
| <b>Classifier</b>  | <b>5</b>                  | <b>10</b>        | <b>20</b>        | <b>40</b>        | <b>50</b>        |
| 'RF'               | '60.38% ± 1.89%'          | '63.16% ± 1.72%' | '63.55% ± 1.99%' | '61.45% ± 1.91%' | '62.14% ± 2.13%' |
| 'PLS-DA'           | '91.86% ± 1.18%'          | '91.99% ± 1.35%' | '92.46% ± 1.15%' | '93.1% ± 1.13%'  | '93.31% ± 1.15%' |
| 'SVM'              | '63.78% ± 2.03%'          | '62.61% ± 2.09%' | '63.52% ± 2.04%' | '61.35% ± 2.21%' | '62.11% ± 2.25%' |
| 'RLR'              | '64.99% ± 1.99%'          | '64.76% ± 1.93%' | '65.59% ± 1.85%' | '65.46% ± 1.91%' | '66.37% ± 1.98%' |
| 'kNN'              | '60.34% ± 2.23%'          | '61.92% ± 2%'    | '64% ± 1.85%'    | '60.71% ± 1.95%' | '61.93% ± 1.96%' |
| <b>Chi-Squared</b> |                           |                  |                  |                  |                  |
| <b>Accuracy</b>    | mean accuracy ± 95% CI    |                  |                  |                  |                  |
| <b>Classifier</b>  | <b>5</b>                  | <b>10</b>        | <b>20</b>        | <b>40</b>        | <b>50</b>        |
| 'RF'               | '63.83% ± 1.71%'          | '65.45% ± 1.66%' | '66.93% ± 1.45%' | '67.45% ± 1.45%' | '67.59% ± 1.38%' |
| 'PLS-DA'           | '92.03% ± 1.13%'          | '92.72% ± 1.1%'  | '92.79% ± 1.04%' | '93.24% ± 1.09%' | '92.24% ± 1.17%' |
| 'SVM'              | '64.41% ± 1.56%'          | '65.07% ± 1.68%' | '67.07% ± 1.57%' | '67.76% ± 1.46%' | '68.41% ± 1.57%' |
| 'RLR'              | '64.28% ± 1.59%'          | '65.83% ± 1.72%' | '66.38% ± 1.48%' | '67.31% ± 1.54%' | '68.03% ± 1.72%' |
| 'kNN'              | '64.79% ± 1.6%'           | '65.59% ± 1.52%' | '66.66% ± 1.32%' | '67.31% ± 1.44%' | '67.21% ± 1.63%' |
| <b>Recall</b>      | mean recall ± 95% CI      |                  |                  |                  |                  |
| <b>Classifier</b>  | <b>5</b>                  | <b>10</b>        | <b>20</b>        | <b>40</b>        | <b>50</b>        |
| 'RF'               | '60.99% ± 2.4%'           | '60.66% ± 2.51%' | '61% ± 2.54%'    | '60.59% ± 2.42%' | '61.57% ± 2.37%' |
| 'PLS-DA'           | '93.92% ± 2.02%'          | '95.47% ± 1.58%' | '94.24% ± 1.87%' | '92.98% ± 2.2%'  | '91.84% ± 2.07%' |
| 'SVM'              | '59.53% ± 2.83%'          | '60.05% ± 2.36%' | '60.93% ± 2.59%' | '59.39% ± 2.22%' | '60.7% ± 2.45%'  |
| 'RLR'              | '60.05% ± 2.86%'          | '63.9% ± 2.34%'  | '63.36% ± 2.39%' | '63.44% ± 2.19%' | '64.96% ± 2.34%' |
| 'kNN'              | '63.02% ± 2.69%'          | '61.63% ± 2.1%'  | '62.25% ± 2.38%' | '62.1% ± 2.15%'  | '61.82% ± 2.22%' |
| <b>Precision</b>   | mean precision ± 95% CI   |                  |                  |                  |                  |
| <b>Classifier</b>  | <b>5</b>                  | <b>10</b>        | <b>20</b>        | <b>40</b>        | <b>50</b>        |
| 'RF'               | '61.93% ± 2.09%'          | '63.99% ± 1.99%' | '66.04% ± 1.85%' | '67.33% ± 1.86%' | '67.19% ± 1.84%' |
| 'PLS-DA'           | '91.25% ± 1.97%'          | '91.21% ± 1.95%' | '92.19% ± 1.81%' | '93.88% ± 1.66%' | '93.41% ± 1.97%' |
| 'SVM'              | '62.73% ± 1.94%'          | '64.19% ± 2.17%' | '66.65% ± 2.03%' | '68.63% ± 2.09%' | '68.61% ± 2.07%' |
| 'RLR'              | '62.35% ± 1.99%'          | '64.09% ± 2.1%'  | '64.65% ± 1.78%' | '66% ± 1.91%'    | '66.74% ± 2.13%' |
| 'kNN'              | '62.31% ± 1.82%'          | '64.14% ± 1.98%' | '65.39% ± 1.72%' | '66.69% ± 1.93%' | '66.34% ± 2.09%' |
| <b>Specificity</b> | mean specificity ± 95% CI |                  |                  |                  |                  |
| <b>Classifier</b>  | <b>5</b>                  | <b>10</b>        | <b>20</b>        | <b>40</b>        | <b>50</b>        |
| 'RF'               | '66.25% ± 2.5%'           | '69.63% ± 2.28%' | '72.05% ± 2.05%' | '73.41% ± 2.27%' | '72.86% ± 2.17%' |
| 'PLS-DA'           | '90.39% ± 2.32%'          | '90.27% ± 2.33%' | '91.52% ± 2.1%'  | '93.49% ± 1.89%' | '92.58% ± 2.35%' |
| 'SVM'              | '68.64% ± 2.22%'          | '69.32% ± 2.61%' | '72.33% ± 2.35%' | '75.03% ± 2.38%' | '75.09% ± 2.14%' |
| 'RLR'              | '67.95% ± 2.3%'           | '67.44% ± 2.59%' | '68.93% ± 2.24%' | '70.64% ± 2.21%' | '70.7% ± 2.45%'  |
| 'kNN'              | '66.31% ± 2.18%'          | '68.95% ± 2.31%' | '70.42% ± 2.09%' | '71.75% ± 2.23%' | '71.85% ± 2.15%' |
| <b>NPV</b>         | mean NPV ± 95% CI         |                  |                  |                  |                  |
| <b>Classifier</b>  | <b>5</b>                  | <b>10</b>        | <b>20</b>        | <b>40</b>        | <b>50</b>        |

|                    |                           |                  |                  |                  |                  |                  |
|--------------------|---------------------------|------------------|------------------|------------------|------------------|------------------|
|                    | 'RF'                      | '66.25% ± 2.5%'  | '69.63% ± 2.28%' | '72.05% ± 2.05%' | '73.41% ± 2.27%' | '72.86% ± 2.17%' |
|                    | 'PLS-DA'                  | '90.39% ± 2.32%' | '90.27% ± 2.33%' | '91.52% ± 2.1%'  | '93.49% ± 1.89%' | '92.58% ± 2.35%' |
|                    | 'SVM'                     | '68.64% ± 2.22%' | '69.32% ± 2.61%' | '72.33% ± 2.35%' | '75.03% ± 2.38%' | '75.09% ± 2.14%' |
|                    | 'RLR'                     | '67.95% ± 2.3%'  | '67.44% ± 2.59%' | '68.93% ± 2.24%' | '70.64% ± 2.21%' | '70.7% ± 2.45%'  |
|                    | 'kNN'                     | '66.31% ± 2.18%' | '68.95% ± 2.31%' | '70.42% ± 2.09%' | '71.75% ± 2.23%' | '71.85% ± 2.15%' |
| <b>F1</b>          | mean F1 ± 95% CI          |                  |                  |                  |                  |                  |
| <b>Classifier</b>  | <b>5</b>                  | <b>10</b>        | <b>20</b>        | <b>40</b>        | <b>50</b>        |                  |
| 'RF'               | '61.89% ± 2.78%'          | '62.53% ± 2.79%' | '62.8% ± 2.79%'  | '63.84% ± 2.92%' | '63.37% ± 2.57%' |                  |
| 'PLS-DA'           | '90.59% ± 1.83%'          | '91.08% ± 1.65%' | '90.94% ± 1.88%' | '92.49% ± 1.96%' | '91.38% ± 1.56%' |                  |
| 'SVM'              | '60.99% ± 3.2%'           | '62.28% ± 2.88%' | '63.95% ± 2.44%' | '62.61% ± 2.74%' | '64.25% ± 2.7%'  |                  |
| 'RLR'              | '63.06% ± 2.87%'          | '64.14% ± 3.09%' | '63.81% ± 2.73%' | '64.75% ± 2.23%' | '65.77% ± 2.43%' |                  |
| 'kNN'              | '62.89% ± 2.81%'          | '62.52% ± 2.66%' | '64.44% ± 2.47%' | '63.39% ± 2.4%'  | '63.23% ± 2.59%' |                  |
| <b>Variance</b>    |                           |                  |                  |                  |                  |                  |
| <b>Accuracy</b>    | mean accuracy ± 95% CI    |                  |                  |                  |                  |                  |
| <b>Classifier</b>  | <b>5</b>                  | <b>10</b>        | <b>20</b>        | <b>40</b>        | <b>50</b>        |                  |
| 'RF'               | '58.52% ± 2.33%'          | '62.34% ± 2.12%' | '65.48% ± 2.36%' | '72.28% ± 2.02%' | '71.9% ± 1.81%'  |                  |
| 'PLS-DA'           | '92.62% ± 1.71%'          | '92.38% ± 1.77%' | '92.24% ± 1.47%' | '92.72% ± 1.5%'  | '92.17% ± 1.55%' |                  |
| 'SVM'              | '62.86% ± 2.29%'          | '62.66% ± 2.26%' | '64.41% ± 2.39%' | '66.86% ± 2.5%'  | '67.83% ± 2.39%' |                  |
| 'RLR'              | '61.62% ± 2.35%'          | '63.17% ± 2.31%' | '63.86% ± 2.39%' | '67.07% ± 2.68%' | '65.9% ± 2.47%'  |                  |
| 'kNN'              | '62.72% ± 2.32%'          | '60.83% ± 2.12%' | '62.34% ± 2.34%' | '66.93% ± 2.41%' | '66.38% ± 2.19%' |                  |
| <b>Recall</b>      | mean recall ± 95% CI      |                  |                  |                  |                  |                  |
| <b>Classifier</b>  | <b>5</b>                  | <b>10</b>        | <b>20</b>        | <b>40</b>        | <b>50</b>        |                  |
| 'RF'               | '55.34% ± 3.65%'          | '57.34% ± 3.14%' | '57.19% ± 3.66%' | '59.08% ± 3.33%' | '59.02% ± 3.37%' |                  |
| 'PLS-DA'           | '89.59% ± 3.76%'          | '88.71% ± 3.96%' | '89.82% ± 3.63%' | '89.23% ± 3.56%' | '89.09% ± 3.59%' |                  |
| 'SVM'              | '47.57% ± 3.75%'          | '45.9% ± 3.67%'  | '48.51% ± 3.61%' | '52.92% ± 3.65%' | '54.64% ± 3.75%' |                  |
| 'RLR'              | '51.4% ± 3.88%'           | '52.59% ± 3.69%' | '54.8% ± 3.95%'  | '59.84% ± 4.09%' | '58.69% ± 3.76%' |                  |
| 'kNN'              | '54.21% ± 4.2%'           | '49.5% ± 3.74%'  | '49.58% ± 3.48%' | '51.24% ± 3.86%' | '51.04% ± 3.44%' |                  |
| <b>Precision</b>   | mean precision ± 95% CI   |                  |                  |                  |                  |                  |
| <b>Classifier</b>  | <b>5</b>                  | <b>10</b>        | <b>20</b>        | <b>40</b>        | <b>50</b>        |                  |
| 'RF'               | '55.61% ± 2.63%'          | '60.8% ± 2.63%'  | '64.99% ± 3%'    | '77.44% ± 3.18%' | '76.66% ± 2.93%' |                  |
| 'PLS-DA'           | '95.56% ± 2.13%'          | '95.87% ± 2.07%' | '94.58% ± 2.11%' | '95.94% ± 1.97%' | '95.16% ± 2.2%'  |                  |
| 'SVM'              | '64.04% ± 3.34%'          | '64.18% ± 3.45%' | '66.74% ± 3.61%' | '70.09% ± 3.64%' | '70.77% ± 3.48%' |                  |
| 'RLR'              | '60.62% ± 3.05%'          | '62.83% ± 3.13%' | '63.29% ± 3.17%' | '66.95% ± 3.5%'  | '65.48% ± 3.23%' |                  |
| 'kNN'              | '61.22% ± 2.89%'          | '59.8% ± 3.03%'  | '62.87% ± 3.47%' | '71.07% ± 3.69%' | '70.09% ± 3.4%'  |                  |
| <b>Specificity</b> | mean specificity ± 95% CI |                  |                  |                  |                  |                  |
| <b>Classifier</b>  | <b>5</b>                  | <b>10</b>        | <b>20</b>        | <b>40</b>        | <b>50</b>        |                  |
| 'RF'               | '61.25% ± 3.15%'          | '66.66% ± 3.47%' | '72.64% ± 3.01%' | '83.8% ± 2.86%'  | '83.16% ± 2.69%' |                  |
| 'PLS-DA'           | '95.2% ± 2.46%'           | '95.51% ± 2.43%' | '94.28% ± 2.35%' | '95.72% ± 2.14%' | '94.84% ± 2.49%' |                  |
| 'SVM'              | '76.12% ± 2.92%'          | '77.16% ± 2.72%' | '78.2% ± 2.93%'  | '78.95% ± 3.33%' | '79.29% ± 3.24%' |                  |
| 'RLR'              | '70.5% ± 3.08%'           | '72.36% ± 2.92%' | '71.69% ± 3.18%' | '73.29% ± 3.43%' | '72.16% ± 3.25%' |                  |

|       |                  |                  |                  |                  |                  |
|-------|------------------|------------------|------------------|------------------|------------------|
| 'kNN' | '70.02% ± 3.04%' | '70.61% ± 2.95%' | '73.33% ± 3.36%' | '80.64% ± 3.16%' | '79.72% ± 3.17%' |
|-------|------------------|------------------|------------------|------------------|------------------|

| NPV        | mean NPV ± 95% CI |                  |                  |                  |                  |
|------------|-------------------|------------------|------------------|------------------|------------------|
| Classifier | 5                 | 10               | 20               | 40               | 50               |
| 'RF'       | '61.47% ± 2.34%'  | '64.29% ± 2.04%' | '66.45% ± 2.25%' | '70.48% ± 1.96%' | '70.37% ± 1.85%' |
| 'PLS-DA'   | '92.68% ± 2.46%'  | '92.1% ± 2.54%'  | '92.8% ± 2.46%'  | '92.3% ± 2.37%'  | '92.23% ± 2.42%' |
| 'SVM'      | '62.84% ± 2.06%'  | '62.38% ± 1.95%' | '63.82% ± 2.1%'  | '66.03% ± 2.29%' | '67.04% ± 2.13%' |
| 'RLR'      | '62.86% ± 2.21%'  | '64.02% ± 2.16%' | '65% ± 2.33%'    | '68.17% ± 2.64%' | '67.1% ± 2.42%'  |
| 'kNN'      | '64.42% ± 2.45%'  | '62.02% ± 1.91%' | '62.67% ± 1.97%' | '65.82% ± 2.22%' | '65.31% ± 1.96%' |

| F1         | mean F1 ± 95% CI |                  |                  |                  |                  |
|------------|------------------|------------------|------------------|------------------|------------------|
| Classifier | 5                | 10               | 20               | 40               | 50               |
| 'RF'       | '54.96% ± 2.83%' | '58.39% ± 2.39%' | '60.23% ± 3.01%' | '66.11% ± 2.6%'  | '65.69% ± 2.48%' |
| 'PLS-DA'   | '91.46% ± 2.19%' | '91.06% ± 2.36%' | '91.15% ± 1.88%' | '91.57% ± 1.97%' | '91.03% ± 1.93%' |
| 'SVM'      | '53.72% ± 3.23%' | '52.71% ± 3.26%' | '55.42% ± 3.22%' | '59.39% ± 3.1%'  | '60.76% ± 3.16%' |
| 'RLR'      | '54.87% ± 3.19%' | '56.54% ± 3.05%' | '57.93% ± 3.15%' | '62.89% ± 3.11%' | '61.16% ± 3.03%' |
| 'kNN'      | '56.71% ± 3.29%' | '53.4% ± 3.02%'  | '54.61% ± 3.07%' | '58.46% ± 3.22%' | '58.09% ± 2.91%' |

#### Genetic Algorithm: PopSize = 50, Max NumGen= 35

| Accuracy   | accuracy |          |          |          |          |
|------------|----------|----------|----------|----------|----------|
| Classifier | 5        | 10       | 20       | 40       | 50       |
| 'RF'       | '55.17%' | '65.52%' | '75.86%' | '62.07%' | '75.86%' |
| 'PLS-DA'   | '100%'   | '89.66%' | '96.55%' | '89.66%' | '96.55%' |
| 'SVM'      | '62.07%' | '75.86%' | '68.97%' | '72.41%' | '62.07%' |
| 'RMR'      | '79.31%' | '75.86%' | '72.41%' | '68.97%' | '75.86%' |
| 'kNN'      | '65.52%' | '55.17%' | '65.52%' | '79.31%' | '51.72%' |

| Recall     |          | recall   |          |          |          |  |
|------------|----------|----------|----------|----------|----------|--|
| Classifier | 5        | 10       | 20       | 40       | 50       |  |
| 'RF'       | '35.71%' | '42.86%' | '71.43%' | '50%'    | '57.14%' |  |
| 'PLS-DA'   | '100%'   | '100%'   | '100%'   | '78.57%' | '92.86%' |  |
| 'SVM'      | '35.71%' | '57.14%' | '42.86%' | '64.29%' | '28.57%' |  |
| 'RMR'      | '71.43%' | '71.43%' | '57.14%' | '71.43%' | '57.14%' |  |
| 'kNN'      | '64.29%' | '35.71%' | '64.29%' | '64.29%' | '57.14%' |  |

| Precision  |          | precision |          |          |          |  |
|------------|----------|-----------|----------|----------|----------|--|
| Classifier | 5        | 10        | 20       | 40       | 50       |  |
| 'RF'       | '55.56%' | '75%'     | '76.92%' | '63.64%' | '88.89%' |  |
| 'PLS-DA'   | '100%'   | '82.35%'  | '93.33%' | '100%'   | '100%'   |  |
| 'SVM'      | '71.43%' | '88.89%'  | '85.71%' | '75%'    | '80%'    |  |
| 'RMR'      | '83.33%' | '76.92%'  | '80%'    | '66.67%' | '88.89%' |  |
| 'kNN'      | '64.29%' | '55.56%'  | '64.29%' | '90%'    | '50%'    |  |

| Specificity |   | specificity |    |    |    |  |
|-------------|---|-------------|----|----|----|--|
| Classifier  | 5 | 10          | 20 | 40 | 50 |  |

|          |          |          |          |          |          |
|----------|----------|----------|----------|----------|----------|
| 'RF'     | '73.33%' | '86.67%' | '80%'    | '73.33%' | '93.33%' |
| 'PLS-DA' | '100%'   | '80%'    | '93.33%' | '100%'   | '100%'   |
| 'SVM'    | '86.67%' | '93.33%' | '93.33%' | '80%'    | '93.33%' |
| 'RMR'    | '86.67%' | '80%'    | '86.67%' | '66.67%' | '93.33%' |
| 'kNN'    | '66.67%' | '73.33%' | '66.67%' | '93.33%' | '46.67%' |

| NPV        |  | NPV      |         |          |          |          |
|------------|--|----------|---------|----------|----------|----------|
| Classifier |  | 5        | 10      | 20       | 40       | 50       |
| 'RF'       |  | '55%'    | '61.9%' | '75%'    | '61.11%' | '70%'    |
| 'PLS-DA'   |  | '100%'   | '100%'  | '100%'   | '83.33%' | '93.75%' |
| 'SVM'      |  | '59.09%' | '70%'   | '63.64%' | '70.59%' | '58.33%' |
| 'RMR'      |  | '76.47%' | '75%'   | '68.42%' | '71.43%' | '70%'    |
| 'kNN'      |  | '66.67%' | '55%'   | '66.67%' | '73.68%' | '53.85%' |

| F1         |  | F1       |          |          |          |          |
|------------|--|----------|----------|----------|----------|----------|
| Classifier |  | 5        | 10       | 20       | 40       | 50       |
| 'RF'       |  | '43.48%' | '54.55%' | '74.07%' | '56%'    | '69.57%' |
| 'PLS-DA'   |  | '100%'   | '90.32%' | '96.55%' | '88%'    | '96.3%'  |
| 'SVM'      |  | '47.62%' | '69.57%' | '57.14%' | '69.23%' | '42.11%' |
| 'RMR'      |  | '76.92%' | '74.07%' | '66.67%' | '68.97%' | '69.57%' |
| 'kNN'      |  | '64.29%' | '43.48%' | '64.29%' | '75%'    | '53.33%' |

| Number of Generations |  |    |    |    |    |    |
|-----------------------|--|----|----|----|----|----|
| Classifier            |  | 5  | 10 | 20 | 40 | 50 |
| 'RF'                  |  | 35 | 35 | 35 | 35 | 35 |
| 'PLS-DA'              |  | 35 | 35 | 35 | 35 | 35 |
| 'SVM'                 |  | 35 | 35 | 35 | 35 | 35 |
| 'RMR'                 |  | 35 | 35 | 35 | 35 | 35 |
| 'kNN'                 |  | 35 | 35 | 35 | 35 | 35 |

This means that in all cases the algorithm stopped after reaching the max number of generations

#### Genetic Algorithm: PopSize = 200, Max Num Gen = 150

| Accuracy   |  | accuracy |          |          |          |          |
|------------|--|----------|----------|----------|----------|----------|
| Classifier |  | 5        | 10       | 20       | 40       | 50       |
| 'RF'       |  | '58.62%' | '58.62%' | '65.52%' | '72.41%' | '79.31%' |
| 'PLS-DA'   |  | '86.21%' | '89.66%' | '93.1%'  | '100%'   | '93.1%'  |
| 'SVM'      |  | '72.41%' | '75.86%' | '75.86%' | '82.76%' | '55.17%' |
| 'RMR'      |  | '75.86%' | '68.97%' | '55.17%' | '75.86%' | '65.52%' |
| 'kNN'      |  | '44.83%' | '62.07%' | '65.52%' | '62.07%' | '62.07%' |

| Recall     |  | recall   |          |          |          |          |
|------------|--|----------|----------|----------|----------|----------|
| Classifier |  | 5        | 10       | 20       | 40       | 50       |
| 'RF'       |  | '64.29%' | '35.71%' | '64.29%' | '50%'    | '64.29%' |
| 'PLS-DA'   |  | '71.43%' | '78.57%' | '85.71%' | '100%'   | '85.71%' |
| 'SVM'      |  | '57.14%' | '64.29%' | '64.29%' | '64.29%' | '35.71%' |

|                       |             |           |           |           |           |
|-----------------------|-------------|-----------|-----------|-----------|-----------|
| 'RMR'                 | '71.43%'    | '50%'     | '42.86%'  | '78.57%'  | '42.86%'  |
| 'kNN'                 | '64.29%'    | '42.86%'  | '57.14%'  | '64.29%'  | '42.86%'  |
|                       |             |           |           |           |           |
| Precision             |             |           |           |           |           |
|                       | precision   |           |           |           |           |
| <b>Classifier</b>     | <b>5</b>    | <b>10</b> | <b>20</b> | <b>40</b> | <b>50</b> |
| 'RF'                  | '56.25%'    | '62.5%'   | '64.29%'  | '87.5%'   | '90%'     |
| 'PLS-DA'              | '100%'      | '100%'    | '100%'    | '100%'    | '100%'    |
| 'SVM'                 | '80%'       | '81.82%'  | '81.82%'  | '100%'    | '55.56%'  |
| 'RMR'                 | '76.92%'    | '77.78%'  | '54.55%'  | '73.33%'  | '75%'     |
| 'kNN'                 | '45%'       | '66.67%'  | '66.67%'  | '60%'     | '66.67%'  |
|                       |             |           |           |           |           |
| Specificity           |             |           |           |           |           |
|                       | specificity |           |           |           |           |
| <b>Classifier</b>     | <b>5</b>    | <b>10</b> | <b>20</b> | <b>40</b> | <b>50</b> |
| 'RF'                  | '53.33%'    | '80%'     | '66.67%'  | '93.33%'  | '93.33%'  |
| 'PLS-DA'              | '100%'      | '100%'    | '100%'    | '100%'    | '100%'    |
| 'SVM'                 | '86.67%'    | '86.67%'  | '86.67%'  | '100%'    | '73.33%'  |
| 'RMR'                 | '80%'       | '86.67%'  | '66.67%'  | '73.33%'  | '86.67%'  |
| 'kNN'                 | '26.67%'    | '80%'     | '73.33%'  | '60%'     | '80%'     |
|                       |             |           |           |           |           |
| NPV                   |             |           |           |           |           |
|                       | NPV         |           |           |           |           |
| <b>Classifier</b>     | <b>5</b>    | <b>10</b> | <b>20</b> | <b>40</b> | <b>50</b> |
| 'RF'                  | '61.54%'    | '57.14%'  | '66.67%'  | '66.67%'  | '73.68%'  |
| 'PLS-DA'              | '78.95%'    | '83.33%'  | '88.24%'  | '100%'    | '88.24%'  |
| 'SVM'                 | '68.42%'    | '72.22%'  | '72.22%'  | '75%'     | '55%'     |
| 'RMR'                 | '75%'       | '65%'     | '55.56%'  | '78.57%'  | '61.9%'   |
| 'kNN'                 | '44.44%'    | '60%'     | '64.71%'  | '64.29%'  | '60%'     |
|                       |             |           |           |           |           |
| F1                    |             |           |           |           |           |
|                       | F1          |           |           |           |           |
| <b>Classifier</b>     | <b>5</b>    | <b>10</b> | <b>20</b> | <b>40</b> | <b>50</b> |
| 'RF'                  | '60%'       | '45.45%'  | '64.29%'  | '63.64%'  | '75%'     |
| 'PLS-DA'              | '83.33%'    | '88%'     | '92.31%'  | '100%'    | '92.31%'  |
| 'SVM'                 | '66.67%'    | '72%'     | '72%'     | '78.26%'  | '43.48%'  |
| 'RMR'                 | '74.07%'    | '60.87%'  | '48%'     | '75.86%'  | '54.55%'  |
| 'kNN'                 | '52.94%'    | '52.17%'  | '61.54%'  | '62.07%'  | '52.17%'  |
|                       |             |           |           |           |           |
| Number of Generations |             |           |           |           |           |
| <b>Classifier</b>     | <b>5</b>    | <b>10</b> | <b>20</b> | <b>40</b> | <b>50</b> |
| 'RF'                  | 66          | 69        | 84        | 108       | 90        |
| 'PLS-DA'              | 62          | 52        | 59        | 52        | 62        |
| 'SVM'                 | 77          | 77        | 79        | 99        | 82        |
| 'RMR'                 | 150         | 150       | 150       | 150       | 150       |
| 'kNN'                 | 51          | 51        | 51        | 51        | 51        |

## Rsp100\_FeaturesSets\_SMK\_CAN\_187

### mRM R

| Accuracy   | mean accuracy $\pm$ 95% CI |                      |                      |                      |                      |                      |                      |
|------------|----------------------------|----------------------|----------------------|----------------------|----------------------|----------------------|----------------------|
| Classifier | 20%                        | 30%                  | 40%                  | 50%                  | 60%                  | 70%                  | 80%                  |
| 'RF'       | '68.86% $\pm$ 1.42%'       | '68.69% $\pm$ 1.38%' | '68.83% $\pm$ 1.41%' | '67.9% $\pm$ 1.46%'  | '68.9% $\pm$ 1.3%'   | '68.34% $\pm$ 1.5%'  | '68.97% $\pm$ 1.39%' |
|            | '92.17% $\pm$ 1.22%'       | '93.28% $\pm$ 1.05%' | '92.17% $\pm$ 1.09%' | '92.83% $\pm$ 1.12%' | '92.66% $\pm$ 0.99%' | '91.97% $\pm$ 1.08%' | '91.97% $\pm$ 1.06%' |
| 'PLS-DA'   | '71.28% $\pm$ 1.41%'       | '71% $\pm$ 1.33%'    | '71.79% $\pm$ 1.25%' | '71.9% $\pm$ 1.27%'  | '72.59% $\pm$ 1.29%' | '71.76% $\pm$ 1.28%' | '70.93% $\pm$ 1.24%' |
|            | '75.52% $\pm$ 1.25%'       | '74.59% $\pm$ 1.26%' | '74.59% $\pm$ 1.31%' | '74.48% $\pm$ 1.42%' | '73.69% $\pm$ 1.42%' | '73.62% $\pm$ 1.4%'  | '74.03% $\pm$ 1.35%' |
| 'SVM'      | '67.76% $\pm$ 1.5%'        | '66.24% $\pm$ 1.42%' | '66.03% $\pm$ 1.38%' | '65.83% $\pm$ 1.37%' | '65.69% $\pm$ 1.48%' | '65.52% $\pm$ 1.53%' | '66.72% $\pm$ 1.41%' |
|            |                            |                      |                      |                      |                      |                      |                      |
| 'RLR'      |                            |                      |                      |                      |                      |                      |                      |
|            |                            |                      |                      |                      |                      |                      |                      |
| 'kNN'      |                            |                      |                      |                      |                      |                      |                      |
|            |                            |                      |                      |                      |                      |                      |                      |

| Recall     | mean recall $\pm$ 95% CI |                      |                      |                      |                      |                      |                      |
|------------|--------------------------|----------------------|----------------------|----------------------|----------------------|----------------------|----------------------|
| Classifier | 20%                      | 30%                  | 40%                  | 50%                  | 60%                  | 70%                  | 80%                  |
| 'RF'       | '59.79% $\pm$ 2.27%'     | '59.18% $\pm$ 2.4%'  | '59.1% $\pm$ 2.49%'  | '58.38% $\pm$ 2.38%' | '59.92% $\pm$ 2.38%' | '59.11% $\pm$ 2.56%' | '58.45% $\pm$ 2.39%' |
|            | '89.45% $\pm$ 2.71%'     | '91.21% $\pm$ 2.17%' | '89.07% $\pm$ 2.5%'  | '90.34% $\pm$ 2.4%'  | '89.76% $\pm$ 2.11%' | '88.46% $\pm$ 2.7%'  | '89.03% $\pm$ 2.5%'  |
| 'PLS-DA'   | '63.1% $\pm$ 2.54%'      | '61.89% $\pm$ 2.37%' | '62.37% $\pm$ 2.3%'  | '62.77% $\pm$ 2.56%' | '64.42% $\pm$ 2.32%' | '62.82% $\pm$ 2.53%' | '60.86% $\pm$ 2.56%' |
|            | '69.59% $\pm$ 2.14%'     | '68.75% $\pm$ 2.24%' | '68.82% $\pm$ 2.06%' | '68.36% $\pm$ 2.16%' | '68.09% $\pm$ 2.21%' | '68.31% $\pm$ 2.21%' | '68.27% $\pm$ 2.11%' |
| 'SVM'      | '59.29% $\pm$ 2.3%'      | '58.2% $\pm$ 2.47%'  | '58.87% $\pm$ 2.33%' | '58.97% $\pm$ 2.37%' | '58.9% $\pm$ 2.33%'  | '58.35% $\pm$ 2.32%' | '59.63% $\pm$ 2.12%' |
|            |                          |                      |                      |                      |                      |                      |                      |
| 'RLR'      |                          |                      |                      |                      |                      |                      |                      |
|            |                          |                      |                      |                      |                      |                      |                      |
| 'kNN'      |                          |                      |                      |                      |                      |                      |                      |
|            |                          |                      |                      |                      |                      |                      |                      |

| Precision  | mean precision $\pm$ 95% CI |                      |                      |                      |                      |                      |                      |
|------------|-----------------------------|----------------------|----------------------|----------------------|----------------------|----------------------|----------------------|
| Classifier | 20%                         | 30%                  | 40%                  | 50%                  | 60%                  | 70%                  | 80%                  |
| 'RF'       | '70.21% $\pm$ 2.03%'        | '69.93% $\pm$ 1.89%' | '70.56% $\pm$ 2.18%' | '69.56% $\pm$ 2.34%' | '70.22% $\pm$ 1.96%' | '69.62% $\pm$ 2.19%' | '71.31% $\pm$ 2.18%' |
|            | '94.98% $\pm$ 1.68%'        | '95.41% $\pm$ 1.56%' | '95.24% $\pm$ 1.59%' | '95.4% $\pm$ 1.59%'  | '95.6% $\pm$ 1.62%'  | '95.27% $\pm$ 1.45%' | '94.91% $\pm$ 1.61%' |
| 'PLS-DA'   | '73.43% $\pm$ 2.16%'        | '73.26% $\pm$ 2.08%' | '74.29% $\pm$ 1.93%' | '74.46% $\pm$ 1.96%' | '74.8% $\pm$ 2.02%'  | '74.05% $\pm$ 2%'    | '73.54% $\pm$ 1.85%' |
|            | '76.78% $\pm$ 1.8%'         | '75.83% $\pm$ 1.81%' | '75.8% $\pm$ 1.93%'  | '75.71% $\pm$ 2.01%' | '74.57% $\pm$ 2.08%' | '74.19% $\pm$ 1.97%' | '74.87% $\pm$ 1.93%' |
| 'SVM'      | '68.47% $\pm$ 2.09%'        | '66.16% $\pm$ 1.89%' | '65.59% $\pm$ 1.78%' | '65.13% $\pm$ 1.75%' | '65.18% $\pm$ 1.95%' | '65.14% $\pm$ 1.96%' | '66.73% $\pm$ 1.86%' |
|            |                             |                      |                      |                      |                      |                      |                      |
| 'RLR'      |                             |                      |                      |                      |                      |                      |                      |
|            |                             |                      |                      |                      |                      |                      |                      |
| 'kNN'      |                             |                      |                      |                      |                      |                      |                      |
|            |                             |                      |                      |                      |                      |                      |                      |

| Specificity | mean specificity $\pm$ 95% CI |                      |                      |                      |                      |                      |                      |
|-------------|-------------------------------|----------------------|----------------------|----------------------|----------------------|----------------------|----------------------|
| Classifier  | 20%                           | 30%                  | 40%                  | 50%                  | 60%                  | 70%                  | 80%                  |
| 'RF'        | '76.84% $\pm$ 2.06%'          | '77.07% $\pm$ 1.91%' | '77.37% $\pm$ 2.1%'  | '76.26% $\pm$ 2.28%' | '76.82% $\pm$ 2.02%' | '76.42% $\pm$ 2.07%' | '78.22% $\pm$ 2.11%' |
|             | '94.49% $\pm$ 1.92%'          | '95.12% $\pm$ 1.76%' | '94.9% $\pm$ 1.77%'  | '95.02% $\pm$ 1.82%' | '95.25% $\pm$ 1.81%' | '94.99% $\pm$ 1.6%'  | '94.6% $\pm$ 1.76%'  |
| 'PLS-DA'    | '78.46% $\pm$ 2.27%'          | '78.93% $\pm$ 2.08%' | '79.98% $\pm$ 1.96%' | '79.83% $\pm$ 2.09%' | '79.73% $\pm$ 2.12%' | '79.53% $\pm$ 2.04%' | '79.72% $\pm$ 2%'    |
|             | '80.63% $\pm$ 1.92%'          | '79.68% $\pm$ 2.07%' | '79.62% $\pm$ 2.05%' | '79.79% $\pm$ 2.09%' | '78.55% $\pm$ 2.12%' | '78.21% $\pm$ 2.09%' | '79.02% $\pm$ 2.02%' |
| 'SVM'       | '75.13% $\pm$ 2.17%'          | '73.33% $\pm$ 2.02%' | '72.35% $\pm$ 2.06%' | '71.87% $\pm$ 2.03%' | '71.74% $\pm$ 2.15%' | '71.83% $\pm$ 2.28%' | '73.03% $\pm$ 2.21%' |
|             |                               |                      |                      |                      |                      |                      |                      |
| 'RLR'       |                               |                      |                      |                      |                      |                      |                      |
|             |                               |                      |                      |                      |                      |                      |                      |
| 'kNN'       |                               |                      |                      |                      |                      |                      |                      |
|             |                               |                      |                      |                      |                      |                      |                      |



| NPV        |               | mean NPV $\pm$ 95% CI |               |               |               |               |               |
|------------|---------------|-----------------------|---------------|---------------|---------------|---------------|---------------|
| Classifier | 20%           | 30%                   | 40%           | 50%           | 60%           | 70%           | 80%           |
| 'RF'       | '68.85% $\pm$ | '68.71% $\pm$         | '68.82% $\pm$ | '67.97% $\pm$ | '69.11% $\pm$ | '68.56% $\pm$ | '68.6% $\pm$  |
|            | 1.37%'        | 1.33%'                | 1.39%'        | 1.37%'        | 1.34%'        | 1.49%'        | 1.35%'        |
| 'PLS-DA'   | '92.57% $\pm$ | '93.53% $\pm$         | '92.13% $\pm$ | '92.97% $\pm$ | '92.37% $\pm$ | '91.82% $\pm$ | '92.05% $\pm$ |
|            | 1.76%'        | 1.52%'                | 1.69%'        | 1.63%'        | 1.49%'        | 1.82%'        | 1.69%'        |
| 'SVM'      | '71.34% $\pm$ | '70.76% $\pm$         | '71.29% $\pm$ | '71.66% $\pm$ | '72.41% $\pm$ | '71.59% $\pm$ | '70.57% $\pm$ |
|            | 1.43%'        | 1.35%'                | 1.27%'        | 1.36%'        | 1.31%'        | 1.34%'        | 1.35%'        |
| 'RLR'      | '75.61% $\pm$ | '74.93% $\pm$         | '74.82% $\pm$ | '74.56% $\pm$ | '74.13% $\pm$ | '74.21% $\pm$ | '74.36% $\pm$ |
|            | 1.28%'        | 1.36%'                | 1.31%'        | 1.39%'        | 1.42%'        | 1.4%'         | 1.32%'        |
| 'kNN'      | '68.07% $\pm$ | '67.12% $\pm$         | '67.1% $\pm$  | '67.06% $\pm$ | '66.89% $\pm$ | '66.52% $\pm$ | '67.53% $\pm$ |
|            | 1.4%'         | 1.4%'                 | 1.36%'        | 1.35%'        | 1.43%'        | 1.46%'        | 1.3%'         |

| F1         |               | mean F1 $\pm$ 95% CI |               |               |               |               |               |
|------------|---------------|----------------------|---------------|---------------|---------------|---------------|---------------|
| Classifier | 20%           | 30%                  | 40%           | 50%           | 60%           | 70%           | 80%           |
| 'RF'       | '63.88% $\pm$ | '63.37% $\pm$        | '63.44% $\pm$ | '62.57% $\pm$ | '63.84% $\pm$ | '63.08% $\pm$ | '63.33% $\pm$ |
|            | 1.76%'        | 1.86%'               | 1.87%'        | 1.84%'        | 1.71%'        | 1.96%'        | 1.81%'        |
| 'PLS-DA'   | '91.02% $\pm$ | '92.5% $\pm$         | '91.07% $\pm$ | '91.91% $\pm$ | '91.8% $\pm$  | '90.7% $\pm$  | '90.87% $\pm$ |
|            | 1.57%'        | 1.21%'               | 1.37%'        | 1.35%'        | 1.13%'        | 1.41%'        | 1.34%'        |
| 'SVM'      | '66.8% $\pm$  | '66.22% $\pm$        | '66.99% $\pm$ | '67.1% $\pm$  | '68.37% $\pm$ | '67.01% $\pm$ | '65.62% $\pm$ |
|            | 1.79%'        | 1.71%'               | 1.64%'        | 1.73%'        | 1.65%'        | 1.75%'        | 1.72%'        |
| 'RLR'      | '72.38% $\pm$ | '71.37% $\pm$        | '71.48% $\pm$ | '71.25% $\pm$ | '70.53% $\pm$ | '70.54% $\pm$ | '70.85% $\pm$ |
|            | 1.53%'        | 1.51%'               | 1.51%'        | 1.68%'        | 1.69%'        | 1.67%'        | 1.61%'        |
| 'kNN'      | '62.87% $\pm$ | '61.2% $\pm$         | '61.4% $\pm$  | '61.28% $\pm$ | '61.23% $\pm$ | '60.92% $\pm$ | '62.33% $\pm$ |
|            | 1.85%'        | 1.87%'               | 1.77%'        | 1.79%'        | 1.81%'        | 1.82%'        | 1.65%'        |

#### Relief-F

| Accuracy   |               | mean accuracy $\pm$ 95% CI |               |               |               |               |               |
|------------|---------------|----------------------------|---------------|---------------|---------------|---------------|---------------|
| Classifier | 20%           | 30%                        | 40%           | 50%           | 60%           | 70%           | 80%           |
| 'RF'       | '63.88% $\pm$ | '63.37% $\pm$              | '63.44% $\pm$ | '62.57% $\pm$ | '63.84% $\pm$ | '63.08% $\pm$ | '63.33% $\pm$ |
|            | 1.76%'        | 1.86%'                     | 1.87%'        | 1.84%'        | 1.71%'        | 1.96%'        | 1.81%'        |
| 'PLS-DA'   | '91.02% $\pm$ | '92.5% $\pm$               | '91.07% $\pm$ | '91.91% $\pm$ | '91.8% $\pm$  | '90.7% $\pm$  | '90.87% $\pm$ |
|            | 1.57%'        | 1.21%'                     | 1.37%'        | 1.35%'        | 1.13%'        | 1.41%'        | 1.34%'        |
| 'SVM'      | '66.8% $\pm$  | '66.22% $\pm$              | '66.99% $\pm$ | '67.1% $\pm$  | '68.37% $\pm$ | '67.01% $\pm$ | '65.62% $\pm$ |
|            | 1.79%'        | 1.71%'                     | 1.64%'        | 1.73%'        | 1.65%'        | 1.75%'        | 1.72%'        |
| 'RLR'      | '72.38% $\pm$ | '71.37% $\pm$              | '71.48% $\pm$ | '71.25% $\pm$ | '70.53% $\pm$ | '70.54% $\pm$ | '70.85% $\pm$ |
|            | 1.53%'        | 1.51%'                     | 1.51%'        | 1.68%'        | 1.69%'        | 1.67%'        | 1.61%'        |
| 'kNN'      | '62.87% $\pm$ | '61.2% $\pm$               | '61.4% $\pm$  | '61.28% $\pm$ | '61.23% $\pm$ | '60.92% $\pm$ | '62.33% $\pm$ |
|            | 1.85%'        | 1.87%'                     | 1.77%'        | 1.79%'        | 1.81%'        | 1.82%'        | 1.65%'        |

| Recall     |               | mean recall $\pm$ 95% CI |               |               |               |               |               |
|------------|---------------|--------------------------|---------------|---------------|---------------|---------------|---------------|
| Classifier | 20%           | 30%                      | 40%           | 50%           | 60%           | 70%           | 80%           |
| 'RF'       | '59.65% $\pm$ | '59.8% $\pm$             | '58.47% $\pm$ | '59.64% $\pm$ | '59.31% $\pm$ | '59.99% $\pm$ | '58.99% $\pm$ |
|            | 2.4%'         | 2.16%'                   | 2.4%'         | 2.21%'        | 2.4%'         | 2.19%'        | 2.3%'         |
| 'PLS-DA'   | '90.08% $\pm$ | '90.4% $\pm$             | '88.48% $\pm$ | '89.49% $\pm$ | '88.17% $\pm$ | '87.16% $\pm$ | '88.79% $\pm$ |
|            | 2.34%'        | 2.3%'                    | 2.46%'        | 2.29%'        | 2.31%'        | 2.51%'        | 2.53%'        |
| 'SVM'      | '68.69% $\pm$ | '66.49% $\pm$            | '66.1% $\pm$  | '64.55% $\pm$ | '63.49% $\pm$ | '63.64% $\pm$ | '62.39% $\pm$ |
|            | 2.26%'        | 2.22%'                   | 2.33%'        | 2.35%'        | 2.4%'         | 2.42%'        | 2.39%'        |
| 'RLR'      | '69.46% $\pm$ | '68.46% $\pm$            | '67.58% $\pm$ | '67.63% $\pm$ | '67.76% $\pm$ | '67.79% $\pm$ | '67.92% $\pm$ |
|            | 2.06%'        | 2.14%'                   | 2.14%'        | 2.03%'        | 2.21%'        | 2.12%'        | 2.17%'        |
| 'kNN'      | '62.73% $\pm$ | '62.66% $\pm$            | '61.97% $\pm$ | '63.24% $\pm$ | '62.14% $\pm$ | '60.78% $\pm$ | '60.94% $\pm$ |
|            | 2.39%'        | 2.32%'                   | 2.42%'        | 2.32%'        | 2.29%'        | 2.29%'        | 2.45%'        |

| Precision |  | mean precision $\pm$ 95% CI |  |  |  |  |  |
|-----------|--|-----------------------------|--|--|--|--|--|
|-----------|--|-----------------------------|--|--|--|--|--|

| Classifier  | 20%                       | 30%              | 40%              | 50%              | 60%              | 70%              | 80%              |
|-------------|---------------------------|------------------|------------------|------------------|------------------|------------------|------------------|
| 'RF'        | '72.24% ± 2.33%'          | '72.72% ± 1.92%' | '71.36% ± 2.11%' | '71.04% ± 2.12%' | '71.04% ± 2.06%' | '70.11% ± 1.81%' | '70.44% ± 2.19%' |
| 'PLS-DA'    | '95.3% ± 1.49%'           | '95.65% ± 1.58%' | '96.46% ± 1.42%' | '96.16% ± 1.49%' | '96.4% ± 1.53%'  | '96.35% ± 1.47%' | '95.2% ± 1.64%'  |
| 'SVM'       | '76.75% ± 1.99%'          | '76.73% ± 1.87%' | '76.29% ± 1.84%' | '75.74% ± 1.94%' | '74.93% ± 1.94%' | '74.85% ± 1.96%' | '74.55% ± 1.96%' |
| 'RLR'       | '76.02% ± 2.09%'          | '75.05% ± 2.07%' | '74.64% ± 2.07%' | '74.17% ± 1.98%' | '73.91% ± 2%'    | '74.55% ± 2.04%' | '73.86% ± 1.95%' |
| 'kNN'       | '69.36% ± 1.99%'          | '68.19% ± 1.91%' | '67.51% ± 1.74%' | '68.44% ± 1.95%' | '66.56% ± 1.78%' | '65.71% ± 1.85%' | '64.48% ± 1.6%'  |
| Specificity | mean specificity ± 95% CI |                  |                  |                  |                  |                  |                  |
| Classifier  | 20%                       | 30%              | 40%              | 50%              | 60%              | 70%              | 80%              |
| RF'         | '78.59% ± 2.18%'          | '79.42% ± 1.89%' | '78.67% ± 1.97%' | '77.45% ± 2.18%' | '77.69% ± 2.14%' | '76.78% ± 1.92%' | '77.15% ± 2.17%' |
| 'PLS-DA'    | '95.01% ± 1.65%'          | '95.31% ± 1.77%' | '96.19% ± 1.61%' | '95.88% ± 1.67%' | '95.97% ± 1.79%' | '96.07% ± 1.65%' | '94.76% ± 1.87%' |
| 'SVM'       | '80.57% ± 2.07%'          | '81.41% ± 1.92%' | '81.07% ± 1.93%' | '80.63% ± 2.06%' | '80.26% ± 2.05%' | '79.99% ± 2.13%' | '80.04% ± 2.1%'  |
| 'RLR'       | '79.25% ± 2.34%'          | '78.82% ± 2.28%' | '78.69% ± 2.25%' | '78.37% ± 2.1%'  | '78.08% ± 2.14%' | '78.85% ± 2.07%' | '78.15% ± 1.96%' |
| 'kNN'       | '74.67% ± 2.26%'          | '73.4% ± 2.15%'  | '73.02% ± 2.16%' | '73.4% ± 2.29%'  | '71.99% ± 2.1%'  | '71.21% ± 2.21%' | '70.03% ± 2.06%' |
| NPV         | mean NPV ± 95% CI         |                  |                  |                  |                  |                  |                  |
| Classifier  | 20%                       | 30%              | 40%              | 50%              | 60%              | 70%              | 80%              |
| 'RF'        | '69.38% ± 1.46%'          | '69.56% ± 1.29%' | '68.75% ± 1.39%' | '68.93% ± 1.3%'  | '68.93% ± 1.35%' | '68.98% ± 1.24%' | '68.52% ± 1.38%' |
| 'PLS-DA'    | '92.8% ± 1.59%'           | '92.98% ± 1.56%' | '91.72% ± 1.64%' | '92.31% ± 1.56%' | '91.36% ± 1.58%' | '90.69% ± 1.65%' | '91.91% ± 1.72%' |
| 'SVM'       | '75.04% ± 1.38%'          | '73.89% ± 1.38%' | '73.68% ± 1.41%' | '72.68% ± 1.33%' | '72.06% ± 1.33%' | '72.03% ± 1.33%' | '71.32% ± 1.31%' |
| 'RLR'       | '75.07% ± 1.42%'          | '74.37% ± 1.34%' | '73.81% ± 1.3%'  | '73.72% ± 1.28%' | '73.88% ± 1.38%' | '73.99% ± 1.35%' | '74% ± 1.36%'    |
| 'kNN'       | '69.95% ± 1.46%'          | '69.55% ± 1.45%' | '69.12% ± 1.45%' | '69.81% ± 1.49%' | '68.78% ± 1.49%' | '67.83% ± 1.41%' | '67.67% ± 1.44%' |
| F1          | mean F1 ± 95% CI          |                  |                  |                  |                  |                  |                  |
| Classifier  | 20%                       | 30%              | 40%              | 50%              | 60%              | 70%              | 80%              |
| 'RF'        | '64.45% ± 1.8%'           | '64.91% ± 1.65%' | '63.52% ± 1.89%' | '64.02% ± 1.66%' | '63.77% ± 1.82%' | '63.99% ± 1.62%' | '63.38% ± 1.77%' |
| 'PLS-DA'    | '91.76% ± 1.26%'          | '92.11% ± 1.34%' | '91.43% ± 1.38%' | '91.91% ± 1.28%' | '91.27% ± 1.29%' | '90.58% ± 1.42%' | '90.87% ± 1.38%' |
| 'SVM'       | '71.71% ± 1.69%'          | '70.58% ± 1.64%' | '70.11% ± 1.68%' | '68.81% ± 1.62%' | '67.86% ± 1.67%' | '67.84% ± 1.66%' | '66.99% ± 1.65%' |
| 'RLR'       | '71.86% ± 1.48%'          | '70.92% ± 1.63%' | '70.27% ± 1.66%' | '70.2% ± 1.59%'  | '70.08% ± 1.66%' | '70.46% ± 1.68%' | '70.2% ± 1.64%'  |
| 'kNN'       | '65.14% ± 1.81%'          | '64.61% ± 1.7%'  | '63.89% ± 1.71%' | '65.05% ± 1.75%' | '63.71% ± 1.74%' | '62.44% ± 1.65%' | '62.01% ± 1.73%' |

| Chi-Squared            |                               |                      |                      |                      |                      |                      |                      |
|------------------------|-------------------------------|----------------------|----------------------|----------------------|----------------------|----------------------|----------------------|
| Accuracy Classifier    | mean accuracy $\pm$ 95% CI    |                      |                      |                      |                      |                      |                      |
|                        | 20%                           | 30%                  | 40%                  | 50%                  | 60%                  | 70%                  | 80%                  |
| 'RF'                   | '70.34% $\pm$ 1.48%'          | '70.21% $\pm$ 1.25%' | '69.97% $\pm$ 1.29%' | '69.48% $\pm$ 1.26%' | '68.69% $\pm$ 1.36%' | '69.38% $\pm$ 1.38%' | '68.48% $\pm$ 1.36%' |
| 'PLS-DA'               | '92.52% $\pm$ 1.01%'          | '91.97% $\pm$ 0.99%' | '92.38% $\pm$ 1.01%' | '92.55% $\pm$ 1.02%' | '92.86% $\pm$ 1.06%' | '92.07% $\pm$ 1.11%' | '92.41% $\pm$ 1.11%' |
| 'SVM'                  | '74.97% $\pm$ 1.28%'          | '74.48% $\pm$ 1.24%' | '74.93% $\pm$ 1.27%' | '74.17% $\pm$ 1.31%' | '74.24% $\pm$ 1.28%' | '73.52% $\pm$ 1.32%' | '72.97% $\pm$ 1.11%' |
| 'RLR'                  | '72.52% $\pm$ 1.46%'          | '73.38% $\pm$ 1.23%' | '73.62% $\pm$ 1.42%' | '73.59% $\pm$ 1.37%' | '73.62% $\pm$ 1.33%' | '73.41% $\pm$ 1.5%'  | '73.41% $\pm$ 1.42%' |
| 'kNN'                  | '66.69% $\pm$ 1.49%'          | '66.34% $\pm$ 1.45%' | '66.14% $\pm$ 1.46%' | '65.41% $\pm$ 1.39%' | '65.52% $\pm$ 1.35%' | '66.45% $\pm$ 1.41%' | '65.21% $\pm$ 1.48%' |
| Recall Classifier      | mean recall $\pm$ 95% CI      |                      |                      |                      |                      |                      |                      |
|                        | 20%                           | 30%                  | 40%                  | 50%                  | 60%                  | 70%                  | 80%                  |
| 'RF'                   | '61.16% $\pm$ 2.33%'          | '60.14% $\pm$ 2.23%' | '59.92% $\pm$ 2.32%' | '60.46% $\pm$ 2.16%' | '59.9% $\pm$ 2.28%'  | '59.22% $\pm$ 2.27%' | '58.97% $\pm$ 2.34%' |
| 'PLS-DA'               | '90.26% $\pm$ 2.29%'          | '89.81% $\pm$ 2.34%' | '89.5% $\pm$ 2.36%'  | '89.76% $\pm$ 2.42%' | '90.4% $\pm$ 2.32%'  | '88.36% $\pm$ 2.56%' | '89.48% $\pm$ 2.42%' |
| 'SVM'                  | '69.7% $\pm$ 2.2%'            | '68.8% $\pm$ 2.18%'  | '68.26% $\pm$ 2.36%' | '67.94% $\pm$ 2.29%' | '66.24% $\pm$ 2.39%' | '66.07% $\pm$ 2.45%' | '65.27% $\pm$ 2.31%' |
| 'RLR'                  | '67.44% $\pm$ 2.29%'          | '68.23% $\pm$ 2.1%'  | '68.19% $\pm$ 2.16%' | '68.04% $\pm$ 2.23%' | '67.98% $\pm$ 2.18%' | '68.11% $\pm$ 2.29%' | '67.01% $\pm$ 2.23%' |
| 'kNN'                  | '60.42% $\pm$ 2.33%'          | '61.85% $\pm$ 2.28%' | '61.1% $\pm$ 2.24%'  | '60.32% $\pm$ 2.34%' | '59.99% $\pm$ 2.26%' | '60.5% $\pm$ 2.35%'  | '59.93% $\pm$ 2.3%'  |
| Precision Classifier   | mean precision $\pm$ 95% CI   |                      |                      |                      |                      |                      |                      |
|                        | 20%                           | 30%                  | 40%                  | 50%                  | 60%                  | 70%                  | 80%                  |
| 'RF'                   | '72.37% $\pm$ 2.35%'          | '72.76% $\pm$ 2.08%' | '72.16% $\pm$ 1.96%' | '71.35% $\pm$ 2.06%' | '70.07% $\pm$ 2.04%' | '71.73% $\pm$ 2.1%'  | '70.1% $\pm$ 2.1%'   |
| 'PLS-DA'               | '94.88% $\pm$ 1.59%'          | '94.27% $\pm$ 1.64%' | '95.24% $\pm$ 1.55%' | '95.29% $\pm$ 1.48%' | '95.38% $\pm$ 1.58%' | '95.68% $\pm$ 1.54%' | '95.39% $\pm$ 1.57%' |
| 'SVM'                  | '76.02% $\pm$ 1.92%'          | '75.73% $\pm$ 1.94%' | '76.76% $\pm$ 1.92%' | '75.25% $\pm$ 1.79%' | '76.66% $\pm$ 1.96%' | '75.62% $\pm$ 2.06%' | '75.03% $\pm$ 1.81%' |
| 'RLR'                  | '72.83% $\pm$ 2.01%'          | '73.97% $\pm$ 1.83%' | '74.13% $\pm$ 2.05%' | '73.91% $\pm$ 1.83%' | '74.2% $\pm$ 1.94%'  | '73.84% $\pm$ 2.14%' | '74.35% $\pm$ 2.06%' |
| 'kNN'                  | '66.41% $\pm$ 1.98%'          | '65.49% $\pm$ 1.98%' | '65.43% $\pm$ 1.98%' | '64.34% $\pm$ 1.82%' | '64.46% $\pm$ 1.74%' | '65.75% $\pm$ 1.78%' | '64.36% $\pm$ 1.96%' |
| Specificity Classifier | mean specificity $\pm$ 95% CI |                      |                      |                      |                      |                      |                      |
|                        | 20%                           | 30%                  | 40%                  | 50%                  | 60%                  | 70%                  | 80%                  |
| 'RF'                   | '78.44% $\pm$ 2.16%'          | '79.06% $\pm$ 2.01%' | '78.81% $\pm$ 1.93%' | '77.45% $\pm$ 2.14%' | '76.45% $\pm$ 2.1%'  | '78.35% $\pm$ 2.12%' | '76.82% $\pm$ 2.15%' |
| 'PLS-DA'               | '94.49% $\pm$ 1.79%'          | '93.86% $\pm$ 1.86%' | '94.86% $\pm$ 1.73%' | '95% $\pm$ 1.61%'    | '95.03% $\pm$ 1.75%' | '95.35% $\pm$ 1.74%' | '94.9% $\pm$ 1.88%'  |
| 'SVM'                  | '79.52% $\pm$ 2.08%'          | '79.41% $\pm$ 2.1%'  | '80.77% $\pm$ 2.02%' | '79.57% $\pm$ 1.85%' | '81.22% $\pm$ 1.95%' | '80% $\pm$ 2.08%'    | '79.65% $\pm$ 1.95%' |
| 'RLR'                  | '76.84% $\pm$ 2.19%'          | '77.83% $\pm$ 2.05%' | '78.3% $\pm$ 1.97%'  | '78.35% $\pm$ 1.8%'  | '78.51% $\pm$ 1.93%' | '77.97% $\pm$ 2.13%' | '78.97% $\pm$ 1.99%' |
| 'kNN'                  | '72.16% $\pm$ 2.27%'          | '70.32% $\pm$ 2.34%' | '70.54% $\pm$ 2.35%' | '69.85% $\pm$ 2.21%' | '70.4% $\pm$ 2.02%'  | '71.64% $\pm$ 2.16%' | '69.92% $\pm$ 2.36%' |

| NPV Classifier               | mean NPV ± 95% CI      |                  |                  |                  |                  |                  |                  |
|------------------------------|------------------------|------------------|------------------|------------------|------------------|------------------|------------------|
|                              | 20%                    | 30%              | 40%              | 50%              | 60%              | 70%              | 80%              |
| 'RF'                         | '70.11% ± 1.37%'       | '69.74% ± 1.23%' | '69.58% ± 1.29%' | '69.37% ± 1.18%' | '68.85% ± 1.34%' | '68.97% ± 1.3%'  | '68.49% ± 1.32%' |
| 'PLS-DA'                     | '92.87% ± 1.59%'       | '92.6% ± 1.65%'  | '92.39% ± 1.65%' | '92.55% ± 1.65%' | '92.99% ± 1.58%' | '91.59% ± 1.71%' | '92.42% ± 1.67%' |
| 'SVM'                        | '75.5% ± 1.35%'        | '74.92% ± 1.25%' | '74.99% ± 1.36%' | '74.46% ± 1.41%' | '73.88% ± 1.36%' | '73.55% ± 1.39%' | '72.96% ± 1.26%' |
| 'RLR'                        | '73.38% ± 1.43%'       | '74.12% ± 1.29%' | '74.17% ± 1.39%' | '74.16% ± 1.42%' | '74.13% ± 1.35%' | '74.05% ± 1.43%' | '73.62% ± 1.36%' |
| 'kNN'                        | '67.81% ± 1.41%'       | '68.04% ± 1.41%' | '67.63% ± 1.42%' | '67.14% ± 1.38%' | '67.1% ± 1.34%'  | '67.78% ± 1.4%'  | '66.83% ± 1.42%' |
| F1 Classifier                | mean F1 ± 95% CI       |                  |                  |                  |                  |                  |                  |
|                              | 20%                    | 30%              | 40%              | 50%              | 60%              | 70%              | 80%              |
| 'RF'                         | '70.11% ± 1.37%'       | '69.74% ± 1.23%' | '69.58% ± 1.29%' | '69.37% ± 1.18%' | '68.85% ± 1.34%' | '68.97% ± 1.3%'  | '68.49% ± 1.32%' |
| 'PLS-DA'                     | '92.87% ± 1.59%'       | '92.6% ± 1.65%'  | '92.39% ± 1.65%' | '92.55% ± 1.65%' | '92.99% ± 1.58%' | '91.59% ± 1.71%' | '92.42% ± 1.67%' |
| 'SVM'                        | '75.5% ± 1.35%'        | '74.92% ± 1.25%' | '74.99% ± 1.36%' | '74.46% ± 1.41%' | '73.88% ± 1.36%' | '73.55% ± 1.39%' | '72.96% ± 1.26%' |
| 'RLR'                        | '73.38% ± 1.43%'       | '74.12% ± 1.29%' | '74.17% ± 1.39%' | '74.16% ± 1.42%' | '74.13% ± 1.35%' | '74.05% ± 1.43%' | '73.62% ± 1.36%' |
| 'kNN'                        | '67.81% ± 1.41%'       | '68.04% ± 1.41%' | '67.63% ± 1.42%' | '67.14% ± 1.38%' | '67.1% ± 1.34%'  | '67.78% ± 1.4%'  | '66.83% ± 1.42%' |
| Variance Accuracy Classifier | mean accuracy ± 95% CI |                  |                  |                  |                  |                  |                  |
|                              | 20%                    | 30%              | 40%              | 50%              | 60%              | 70%              | 80%              |
| 'RF'                         | '73% ± 1.18%'          | '71.07% ± 1.33%' | '70.93% ± 1.38%' | '70.14% ± 1.36%' | '69.28% ± 1.3%'  | '69% ± 1.33%'    | '69.34% ± 1.23%' |
| 'PLS-DA'                     | '92.97% ± 1.07%'       | '92.34% ± 1.09%' | '93.14% ± 1.08%' | '92.38% ± 1.09%' | '92.62% ± 1.07%' | '92.59% ± 1.26%' | '92.83% ± 1.11%' |
| 'SVM'                        | '71.52% ± 1.28%'       | '72.38% ± 1.32%' | '73.48% ± 1.31%' | '73.14% ± 1.27%' | '72.21% ± 1.3%'  | '72.14% ± 1.28%' | '72.28% ± 1.19%' |
| 'RLR'                        | '71.9% ± 1.44%'        | '73.31% ± 1.36%' | '74.17% ± 1.4%'  | '72.9% ± 1.51%'  | '72.69% ± 1.55%' | '72.48% ± 1.53%' | '72.24% ± 1.51%' |
| 'kNN'                        | '67.62% ± 1.69%'       | '66.93% ± 1.51%' | '67.45% ± 1.53%' | '66.24% ± 1.52%' | '66.21% ± 1.54%' | '66.66% ± 1.56%' | '65.03% ± 1.4%'  |
| Recall Classifier            | mean recall ± 95% CI   |                  |                  |                  |                  |                  |                  |
|                              | 20%                    | 30%              | 40%              | 50%              | 60%              | 70%              | 80%              |
| 'RF'                         | '62.96% ± 2.1%'        | '62.01% ± 2.29%' | '60.84% ± 2.35%' | '60.81% ± 2.13%' | '59.92% ± 2.09%' | '60.48% ± 2.17%' | '59.58% ± 2.31%' |
| 'PLS-DA'                     | '90.91% ± 2.44%'       | '90.99% ± 2.44%' | '89.48% ± 2.32%' | '88.33% ± 2.61%' | '90.1% ± 2.5%'   | '89.91% ± 2.61%' | '90.31% ± 2.37%' |
| 'SVM'                        | '62.06% ± 2.41%'       | '63.18% ± 2.53%' | '65.8% ± 2.48%'  | '65.12% ± 2.42%' | '63.2% ± 2.45%'  | '62.92% ± 2.44%' | '63.13% ± 2.38%' |
| 'RLR'                        | '62.58% ± 2.05%'       | '64.63% ± 2.33%' | '66.87% ± 2.21%' | '65% ± 2.23%'    | '65.58% ± 2.44%' | '66.47% ± 2.23%' | '65.69% ± 2.29%' |
| 'kNN'                        | '61.81% ± 2.69%'       | '60.46% ± 2.44%' | '61.7% ± 2.23%'  | '60.01% ± 2.41%' | '60.09% ± 2.33%' | '60.27% ± 2.36%' | '59.3% ± 2.25%'  |

| Precision Classifier   | mean precision $\pm$ 95% CI   |                      |                      |                      |                      |                      |                      |
|------------------------|-------------------------------|----------------------|----------------------|----------------------|----------------------|----------------------|----------------------|
|                        | 20%                           | 30%                  | 40%                  | 50%                  | 60%                  | 70%                  | 80%                  |
| 'RF'                   | '76.06% $\pm$ 1.84%'          | '72.95% $\pm$ 1.99%' | '73.46% $\pm$ 2%'    | '72.17% $\pm$ 2.09%' | '71.12% $\pm$ 2.05%' | '70.33% $\pm$ 1.87%' | '71.5% $\pm$ 1.97%'  |
| 'PLS-DA'               | '94.97% $\pm$ 1.52%'          | '93.93% $\pm$ 1.68%' | '96.58% $\pm$ 1.4%'  | '96.08% $\pm$ 1.4%'  | '95.06% $\pm$ 1.52%' | '95.43% $\pm$ 1.63%' | '95.4% $\pm$ 1.6%'   |
| 'SVM'                  | '74.27% $\pm$ 2.03%'          | '75.05% $\pm$ 2.03%' | '75.27% $\pm$ 1.82%' | '74.96% $\pm$ 1.76%' | '74.3% $\pm$ 1.84%'  | '74.45% $\pm$ 1.8%'  | '74.62% $\pm$ 1.73%' |
| 'RLR'                  | '74.44% $\pm$ 2.1%'           | '76.04% $\pm$ 2.01%' | '76.1% $\pm$ 2%'     | '74.83% $\pm$ 2.13%' | '73.85% $\pm$ 2.08%' | '73.15% $\pm$ 2.08%' | '73.31% $\pm$ 2.18%' |
| 'kNN'                  | '67.12% $\pm$ 2.07%'          | '66.37% $\pm$ 1.88%' | '67.03% $\pm$ 1.96%' | '65.51% $\pm$ 1.96%' | '65.61% $\pm$ 1.98%' | '66.24% $\pm$ 2.09%' | '64.17% $\pm$ 1.86%' |
| Specificity Classifier | mean specificity $\pm$ 95% CI |                      |                      |                      |                      |                      |                      |
|                        | 20%                           | 30%                  | 40%                  | 50%                  | 60%                  | 70%                  | 80%                  |
| 'RF'                   | '81.82% $\pm$ 1.7%'           | '79.09% $\pm$ 1.84%' | '79.83% $\pm$ 1.92%' | '78.31% $\pm$ 2.08%' | '77.48% $\pm$ 2%'    | '76.49% $\pm$ 2.12%' | '77.96% $\pm$ 2.04%' |
| 'PLS-DA'               | '94.71% $\pm$ 1.66%'          | '93.59% $\pm$ 1.86%' | '96.32% $\pm$ 1.58%' | '95.86% $\pm$ 1.52%' | '94.87% $\pm$ 1.63%' | '94.94% $\pm$ 1.95%' | '95.05% $\pm$ 1.79%' |
| 'SVM'                  | '79.77% $\pm$ 2.1%'           | '80.34% $\pm$ 2.03%' | '80.15% $\pm$ 1.89%' | '80.1% $\pm$ 1.87%'  | '80.07% $\pm$ 1.86%' | '80.17% $\pm$ 1.91%' | '80.25% $\pm$ 1.87%' |
| 'RLR'                  | '80.03% $\pm$ 2.08%'          | '80.85% $\pm$ 2.18%' | '80.5% $\pm$ 2.12%'  | '79.83% $\pm$ 2.13%' | '78.93% $\pm$ 2.08%' | '77.67% $\pm$ 2.24%' | '77.93% $\pm$ 2.25%' |
| 'kNN'                  | '72.76% $\pm$ 2.22%'          | '72.65% $\pm$ 2%'    | '72.48% $\pm$ 2.2%'  | '71.79% $\pm$ 2.09%' | '71.62% $\pm$ 2.18%' | '72.28% $\pm$ 2.2%'  | '70.17% $\pm$ 2.16%' |
| NPV Classifier         | mean NPV $\pm$ 95% CI         |                      |                      |                      |                      |                      |                      |
|                        | 20%                           | 30%                  | 40%                  | 50%                  | 60%                  | 70%                  | 80%                  |
| 'RF'                   | '71.96% $\pm$ 1.2%'           | '70.79% $\pm$ 1.36%' | '70.32% $\pm$ 1.37%' | '69.78% $\pm$ 1.26%' | '69.06% $\pm$ 1.24%' | '69.08% $\pm$ 1.3%'  | '69.2% $\pm$ 1.31%'  |
| 'PLS-DA'               | '93.52% $\pm$ 1.61%'          | '93.52% $\pm$ 1.67%' | '92.34% $\pm$ 1.56%' | '91.7% $\pm$ 1.69%'  | '92.86% $\pm$ 1.66%' | '92.79% $\pm$ 1.77%' | '92.97% $\pm$ 1.61%' |
| 'SVM'                  | '71.07% $\pm$ 1.32%'          | '71.94% $\pm$ 1.37%' | '73.39% $\pm$ 1.44%' | '72.99% $\pm$ 1.36%' | '71.88% $\pm$ 1.36%' | '71.7% $\pm$ 1.37%'  | '71.86% $\pm$ 1.29%' |
| 'RLR'                  | '71.12% $\pm$ 1.32%'          | '72.73% $\pm$ 1.39%' | '73.87% $\pm$ 1.37%' | '72.51% $\pm$ 1.42%' | '72.81% $\pm$ 1.55%' | '72.93% $\pm$ 1.41%' | '72.58% $\pm$ 1.43%' |
| 'kNN'                  | '69.03% $\pm$ 1.73%'          | '68.14% $\pm$ 1.5%'  | '68.58% $\pm$ 1.47%' | '67.54% $\pm$ 1.46%' | '67.48% $\pm$ 1.5%'  | '67.82% $\pm$ 1.46%' | '66.58% $\pm$ 1.35%' |
| F1 Classifier          | mean F1 $\pm$ 95% CI          |                      |                      |                      |                      |                      |                      |
|                        | 20%                           | 30%                  | 40%                  | 50%                  | 60%                  | 70%                  | 80%                  |
| 'RF'                   | '68.23% $\pm$ 1.54%'          | '66.31% $\pm$ 1.72%' | '65.76% $\pm$ 1.8%'  | '65.29% $\pm$ 1.67%' | '64.29% $\pm$ 1.59%' | '64.28% $\pm$ 1.59%' | '64.09% $\pm$ 1.56%' |
| 'PLS-DA'               | '92% $\pm$ 1.36%'             | '91.46% $\pm$ 1.31%' | '92.11% $\pm$ 1.34%' | '91.07% $\pm$ 1.5%'  | '91.56% $\pm$ 1.41%' | '91.58% $\pm$ 1.51%' | '91.9% $\pm$ 1.34%'  |
| 'SVM'                  | '66.62% $\pm$ 1.69%'          | '67.61% $\pm$ 1.82%' | '69.4% $\pm$ 1.77%'  | '68.92% $\pm$ 1.71%' | '67.52% $\pm$ 1.75%' | '67.38% $\pm$ 1.72%' | '67.56% $\pm$ 1.62%' |
| 'RLR'                  | '67.37% $\pm$ 1.66%'          | '69.04% $\pm$ 1.67%' | '70.51% $\pm$ 1.67%' | '68.9% $\pm$ 1.79%'  | '68.82% $\pm$ 1.92%' | '69.08% $\pm$ 1.79%' | '68.61% $\pm$ 1.79%' |
| 'kNN'                  | '63.63% $\pm$ 2.06%'          | '62.67% $\pm$ 1.88%' | '63.67% $\pm$ 1.77%' | '62.01% $\pm$ 1.92%' | '62.11% $\pm$ 1.84%' | '62.47% $\pm$ 1.91%' | '60.98% $\pm$ 1.69%' |

## Rsp100\_Biomarkers\_GLI\_85

| mRMR        |                               |                      |                      |                      |                      |
|-------------|-------------------------------|----------------------|----------------------|----------------------|----------------------|
| Accuracy    | mean accuracy $\pm$ 95% CI    |                      |                      |                      |                      |
| Classifier  | 5                             | 10                   | 20                   | 40                   | 50                   |
| 'RF'        | '83.38% $\pm$ 2.04%'          | '85.54% $\pm$ 1.85%' | '87% $\pm$ 1.63%'    | '87.92% $\pm$ 1.59%' | '87.62% $\pm$ 1.56%' |
| 'PLS-DA'    | '87.08% $\pm$ 2.1%'           | '84.92% $\pm$ 2.23%' | '83% $\pm$ 2.04%'    | '83.54% $\pm$ 2.09%' | '82.77% $\pm$ 1.92%' |
| 'SVM'       | '84.23% $\pm$ 1.82%'          | '85.62% $\pm$ 1.91%' | '86.08% $\pm$ 1.68%' | '86.31% $\pm$ 1.74%' | '87.46% $\pm$ 1.6%'  |
| 'RLR'       | '83.23% $\pm$ 1.96%'          | '83.46% $\pm$ 1.97%' | '83.54% $\pm$ 1.96%' | '84.92% $\pm$ 1.9%'  | '84.31% $\pm$ 1.83%' |
| 'kNN'       | '83.38% $\pm$ 1.81%'          | '85.69% $\pm$ 1.69%' | '86.92% $\pm$ 1.58%' | '88.69% $\pm$ 1.69%' | '88.15% $\pm$ 1.87%' |
| Recall      | mean recall $\pm$ 95% CI      |                      |                      |                      |                      |
| Classifier  | 5                             | 10                   | 20                   | 40                   | 50                   |
| 'RF'        | '68% $\pm$ 4.97%'             | '69.08% $\pm$ 4.62%' | '70.5% $\pm$ 4.47%'  | '67.58% $\pm$ 4.68%' | '67.42% $\pm$ 4.68%' |
| 'PLS-DA'    | '99.5% $\pm$ 0.69%'           | '99.33% $\pm$ 0.92%' | '99.5% $\pm$ 0.69%'  | '99.25% $\pm$ 0.84%' | '98.67% $\pm$ 1.35%' |
| 'SVM'       | '63.67% $\pm$ 4.58%'          | '67.92% $\pm$ 5.15%' | '71.83% $\pm$ 4.34%' | '69.33% $\pm$ 5.05%' | '68.75% $\pm$ 4.78%' |
| 'RLR'       | '62% $\pm$ 5.03%'             | '66.83% $\pm$ 5.02%' | '68.92% $\pm$ 4.55%' | '66.58% $\pm$ 4.81%' | '66.33% $\pm$ 4.71%' |
| 'kNN'       | '64% $\pm$ 4.8%'              | '71.42% $\pm$ 4.14%' | '75.33% $\pm$ 4.09%' | '73.92% $\pm$ 4.77%' | '74.5% $\pm$ 4.78%'  |
| Precision   | mean precision $\pm$ 95% CI   |                      |                      |                      |                      |
| Classifier  | 5                             | 10                   | 20                   | 40                   | 50                   |
| 'RF'        | '72.84% $\pm$ 4.53%'          | '77.73% $\pm$ 4.05%' | '82.1% $\pm$ 3.84%'  | '87.19% $\pm$ 3.61%' | '85.75% $\pm$ 3.86%' |
| 'PLS-DA'    | '72.31% $\pm$ 3.73%'          | '69.05% $\pm$ 3.76%' | '65.04% $\pm$ 3.35%' | '66.58% $\pm$ 3.65%' | '64.87% $\pm$ 3.26%' |
| 'SVM'       | '77.34% $\pm$ 4.34%'          | '78.81% $\pm$ 4.3%'  | '78.38% $\pm$ 4.14%' | '78.97% $\pm$ 4.31%' | '84.18% $\pm$ 3.88%' |
| 'RLR'       | '75.28% $\pm$ 4.77%'          | '73.75% $\pm$ 4.46%' | '72.99% $\pm$ 4.27%' | '77.47% $\pm$ 4.48%' | '76.62% $\pm$ 4.49%' |
| 'kNN'       | '73.43% $\pm$ 4.28%'          | '77.63% $\pm$ 3.94%' | '79.48% $\pm$ 3.81%' | '84.3% $\pm$ 4.1%'   | '82.58% $\pm$ 4.25%' |
| Specificity | mean specificity $\pm$ 95% CI |                      |                      |                      |                      |
| Classifier  | 5                             | 10                   | 20                   | 40                   | 50                   |
| 'RF'        | '89.09% $\pm$ 2.14%'          | '91.7% $\pm$ 1.64%'  | '93.18% $\pm$ 1.57%' | '95.51% $\pm$ 1.3%'  | '95.06% $\pm$ 1.32%' |
| 'PLS-DA'    | '82.5% $\pm$ 2.95%'           | '79.54% $\pm$ 3.09%' | '76.9% $\pm$ 2.88%'  | '77.73% $\pm$ 2.95%' | '76.88% $\pm$ 2.79%' |
| 'SVM'       | '91.73% $\pm$ 1.81%'          | '92.21% $\pm$ 1.7%'  | '91.39% $\pm$ 1.64%' | '92.51% $\pm$ 1.47%' | '94.46% $\pm$ 1.43%' |
| 'RLR'       | '90.93% $\pm$ 1.95%'          | '89.67% $\pm$ 1.97%' | '89.18% $\pm$ 2.02%' | '91.78% $\pm$ 1.74%' | '91.08% $\pm$ 1.84%' |
| 'kNN'       | '90.34% $\pm$ 1.68%'          | '91.16% $\pm$ 1.75%' | '91.32% $\pm$ 1.7%'  | '94.1% $\pm$ 1.5%'   | '93.29% $\pm$ 1.66%' |
| NPV         | mean NPV $\pm$ 95% CI         |                      |                      |                      |                      |
| Classifier  | 5                             | 10                   | 20                   | 40                   | 50                   |
| 'RF'        | '88.93% $\pm$ 1.68%'          | '89.31% $\pm$ 1.59%' | '90.04% $\pm$ 1.52%' | '89.29% $\pm$ 1.46%' | '89.32% $\pm$ 1.48%' |
| 'PLS-DA'    | '99.8% $\pm$ 0.28%'           | '99.82% $\pm$ 0.25%' | '99.8% $\pm$ 0.28%'  | '99.7% $\pm$ 0.34%'  | '99.53% $\pm$ 0.48%' |
| 'SVM'       | '87.8% $\pm$ 1.48%'           | '89.14% $\pm$ 1.65%' | '90.28% $\pm$ 1.5%'  | '89.79% $\pm$ 1.62%' | '89.71% $\pm$ 1.55%' |
| 'RLR'       | '87.3% $\pm$ 1.63%'           | '88.51% $\pm$ 1.69%' | '88.9% $\pm$ 1.62%'  | '88.6% $\pm$ 1.64%'  | '88.44% $\pm$ 1.6%'  |
| 'kNN'       | '87.93% $\pm$ 1.57%'          | '89.99% $\pm$ 1.44%' | '91.37% $\pm$ 1.4%'  | '91.36% $\pm$ 1.56%' | '91.28% $\pm$ 1.59%' |
| F1          | mean F1 $\pm$ 95% CI          |                      |                      |                      |                      |
| Classifier  | 5                             | 10                   | 20                   | 40                   | 50                   |

|          |                  |                  |                  |                  |                  |
|----------|------------------|------------------|------------------|------------------|------------------|
| 'RF'     | '68.14% ± 3.86%' | '70.85% ± 3.75%' | '73.27% ± 3.43%' | '73.97% ± 3.61%' | '73.45% ± 3.46%' |
| 'PLS-DA' | '82.24% ± 2.47%' | '79.79% ± 2.56%' | '77.3% ± 2.29%'  | '78.09% ± 2.43%' | '76.7% ± 2.14%'  |
| 'SVM'    | '67.65% ± 3.67%' | '72.57% ± 3.67%' | '73.31% ± 3.16%' | '73.24% ± 3.5%'  | '74.26% ± 3.36%' |
| 'RLR'    | '66.74% ± 3.82%' | '68.97% ± 3.63%' | '69.77% ± 3.36%' | '69.72% ± 3.82%' | '68.87% ± 3.57%' |
| 'kNN'    | '65.81% ± 3.86%' | '72.07% ± 3.26%' | '74.92% ± 3.11%' | '77.83% ± 3.24%' | '76.72% ± 3.71%' |

#### Relief-F

Accuracy mean accuracy ± 95% CI

| Classifier | 5                | 10               | 20               | 40               | 50               |
|------------|------------------|------------------|------------------|------------------|------------------|
| 'RF'       | '86.85% ± 1.78%' | '89.15% ± 1.65%' | '89.85% ± 1.51%' | '90.08% ± 1.44%' | '89.85% ± 1.64%' |
| 'PLS-DA'   | '92.77% ± 1.4%'  | '91.62% ± 1.53%' | '88.85% ± 1.73%' | '86.31% ± 1.85%' | '85.85% ± 1.97%' |
| 'SVM'      | '85.85% ± 1.71%' | '87.62% ± 1.75%' | '88.77% ± 1.58%' | '90.38% ± 1.43%' | '90.23% ± 1.64%' |
| 'RLR'      | '84.69% ± 1.69%' | '88.31% ± 1.73%' | '87.15% ± 1.63%' | '87.38% ± 1.73%' | '87.23% ± 1.68%' |
| 'kNN'      | '87.46% ± 1.46%' | '89.23% ± 1.56%' | '89.31% ± 1.63%' | '91.08% ± 1.64%' | '90.69% ± 1.59%' |

#### Recall

mean recall ± 95% CI

| Classifier | 5                | 10               | 20               | 40               | 50               |
|------------|------------------|------------------|------------------|------------------|------------------|
| 'RF'       | '73% ± 4.22%'    | '73.33% ± 4.51%' | '74.5% ± 4.37%'  | '74.33% ± 4.18%' | '75.5% ± 4.54%'  |
| 'PLS-DA'   | '93.58% ± 2.68%' | '98% ± 1.45%'    | '100% ± 0%'      | '99.08% ± 1.04%' | '98.92% ± 1.06%' |
| 'SVM'      | '65.67% ± 5.25%' | '71.58% ± 5.03%' | '73.58% ± 4.34%' | '77.25% ± 4.2%'  | '76.08% ± 4.43%' |
| 'RLR'      | '63.58% ± 4.93%' | '75.17% ± 4.76%' | '73.92% ± 4.64%' | '74.17% ± 4.8%'  | '72% ± 4.77%'    |
| 'kNN'      | '71.33% ± 4.53%' | '73.58% ± 4.58%' | '70.83% ± 4.63%' | '75.67% ± 4.39%' | '75% ± 4.61%'    |

#### Precision

mean precision ± 95% CI

| Classifier | 5                | 10               | 20               | 40               | 50               |
|------------|------------------|------------------|------------------|------------------|------------------|
| 'RF'       | '80.52% ± 4%'    | '86.32% ± 3.64%' | '87.3% ± 3.26%'  | '88.03% ± 3.28%' | '86.45% ± 3.56%' |
| 'PLS-DA'   | '86.39% ± 3.25%' | '80.78% ± 3.28%' | '73.92% ± 3.31%' | '70.4% ± 3.44%'  | '69.58% ± 3.43%' |
| 'SVM'      | '81.94% ± 3.99%' | '81.45% ± 4.03%' | '84.82% ± 3.66%' | '87.65% ± 3.17%' | '87.7% ± 3.46%'  |
| 'RLR'      | '80.91% ± 3.98%' | '81.75% ± 3.88%' | '79.19% ± 3.78%' | '80.56% ± 3.85%' | '81.08% ± 4.03%' |
| 'kNN'      | '82.32% ± 3.6%'  | '86.41% ± 3.45%' | '88.42% ± 3.47%' | '90.5% ± 3.3%'   | '89.81% ± 3.21%' |

#### Specificity

mean specificity ± 95% CI

| Classifier | 5                | 10               | 20               | 40               | 50               |
|------------|------------------|------------------|------------------|------------------|------------------|
| 'RF'       | '91.98% ± 1.81%' | '95.08% ± 1.32%' | '95.48% ± 1.14%' | '95.93% ± 1.08%' | '95.17% ± 1.25%' |
| 'PLS-DA'   | '92.42% ± 2.04%' | '89.28% ± 2.17%' | '84.81% ± 2.31%' | '81.53% ± 2.61%' | '81.16% ± 2.75%' |
| 'SVM'      | '93.22% ± 1.61%' | '93.52% ± 1.42%' | '94.46% ± 1.35%' | '95.29% ± 1.21%' | '95.49% ± 1.34%' |
| 'RLR'      | '92.51% ± 1.74%' | '93.21% ± 1.5%'  | '91.94% ± 1.53%' | '92.37% ± 1.58%' | '92.99% ± 1.45%' |
| 'kNN'      | '93.4% ± 1.35%'  | '95.07% ± 1.29%' | '96.2% ± 1.13%'  | '96.83% ± 1.09%' | '96.64% ± 1.05%' |

#### NPV

mean NPV ± 95% CI

| Classifier | 5                | 10               | 20               | 40               | 50               |
|------------|------------------|------------------|------------------|------------------|------------------|
| 'RF'       | '90.56% ± 1.48%' | '90.99% ± 1.48%' | '91.54% ± 1.45%' | '91.45% ± 1.39%' | '91.79% ± 1.5%'  |
| 'PLS-DA'   | '97.93% ± 0.84%' | '99.33% ± 0.48%' | '100% ± 0%'      | '99.72% ± 0.32%' | '99.61% ± 0.38%' |
| 'SVM'      | '88.81% ± 1.68%' | '90.6% ± 1.64%'  | '91.04% ± 1.43%' | '92.33% ± 1.38%' | '91.99% ± 1.49%' |
| 'RLR'      | '87.95% ± 1.61%' | '91.64% ± 1.59%' | '91.18% ± 1.47%' | '91.21% ± 1.61%' | '90.5% ± 1.58%'  |

|                   |                  |                  |                  |                  |                  |
|-------------------|------------------|------------------|------------------|------------------|------------------|
| 'kNN'             | '90.47% ± 1.47%' | '91.13% ± 1.46%' | '90.29% ± 1.51%' | '91.82% ± 1.47%' | '91.61% ± 1.51%' |
| <b>F1</b>         | mean F1 ± 95% CI |                  |                  |                  |                  |
| <b>Classifier</b> | <b>5</b>         | <b>10</b>        | <b>20</b>        | <b>40</b>        | <b>50</b>        |
| 'RF'              | '74.36% ± 3.38%' | '77.14% ± 3.63%' | '78.36% ± 3.42%' | '78.84% ± 3.28%' | '78.64% ± 3.67%' |
| 'PLS-DA'          | '87.87% ± 2.14%' | '87.21% ± 2.03%' | '83.92% ± 2.23%' | '80.88% ± 2.25%' | '80.19% ± 2.28%' |
| 'SVM'             | '70.43% ± 3.74%' | '73.82% ± 3.99%' | '76.71% ± 3.48%' | '80% ± 3.17%'    | '79.53% ± 3.52%' |
| 'RLR'             | '67.81% ± 3.54%' | '76.12% ± 3.78%' | '74.7% ± 3.44%'  | '74.52% ± 3.66%' | '74.36% ± 3.46%' |
| 'kNN'             | '73.75% ± 3.41%' | '77.81% ± 3.45%' | '76.6% ± 3.74%'  | '80.8% ± 3.63%'  | '80.46% ± 3.51%' |

### Chi-Squared

|                   |                        |                  |                  |                  |                  |
|-------------------|------------------------|------------------|------------------|------------------|------------------|
| <b>Accuracy</b>   | mean accuracy ± 95% CI |                  |                  |                  |                  |
| <b>Classifier</b> | <b>5</b>               | <b>10</b>        | <b>20</b>        | <b>40</b>        | <b>50</b>        |
| 'RF'              | '74.36% ± 3.38%'       | '77.14% ± 3.63%' | '78.36% ± 3.42%' | '78.84% ± 3.28%' | '78.64% ± 3.67%' |
| 'PLS-DA'          | '87.87% ± 2.14%'       | '87.21% ± 2.03%' | '83.92% ± 2.23%' | '80.88% ± 2.25%' | '80.19% ± 2.28%' |
| 'SVM'             | '70.43% ± 3.74%'       | '73.82% ± 3.99%' | '76.71% ± 3.48%' | '80% ± 3.17%'    | '79.53% ± 3.52%' |
| 'RLR'             | '67.81% ± 3.54%'       | '76.12% ± 3.78%' | '74.7% ± 3.44%'  | '74.52% ± 3.66%' | '74.36% ± 3.46%' |
| 'kNN'             | '73.75% ± 3.41%'       | '77.81% ± 3.45%' | '76.6% ± 3.74%'  | '80.8% ± 3.63%'  | '80.46% ± 3.51%' |

|                   |                      |                  |                  |                  |                  |
|-------------------|----------------------|------------------|------------------|------------------|------------------|
| <b>Recall</b>     | mean recall ± 95% CI |                  |                  |                  |                  |
| <b>Classifier</b> | <b>5</b>             | <b>10</b>        | <b>20</b>        | <b>40</b>        | <b>50</b>        |
| 'RF'              | '77.5% ± 4.26%'      | '78.75% ± 4.43%' | '78.5% ± 4.22%'  | '77.42% ± 4.34%' | '76.42% ± 4.28%' |
| 'PLS-DA'          | '99.33% ± 0.92%'     | '98.83% ± 1.14%' | '99.17% ± 0.94%' | '98.08% ± 1.55%' | '97.58% ± 1.88%' |
| 'SVM'             | '66.58% ± 4.92%'     | '70.92% ± 4.77%' | '75.33% ± 4.69%' | '73.67% ± 4.81%' | '73.5% ± 4.52%'  |
| 'RLR'             | '67.5% ± 5.01%'      | '74.17% ± 4.66%' | '76.92% ± 4.36%' | '76.33% ± 4.23%' | '74.42% ± 4.42%' |
| 'kNN'             | '71.17% ± 5.1%'      | '73.42% ± 4.48%' | '73.58% ± 4.75%' | '75.67% ± 4.64%' | '74.67% ± 4.83%' |

|                   |                         |                  |                  |                  |                  |
|-------------------|-------------------------|------------------|------------------|------------------|------------------|
| <b>Precision</b>  | mean precision ± 95% CI |                  |                  |                  |                  |
| <b>Classifier</b> | <b>5</b>                | <b>10</b>        | <b>20</b>        | <b>40</b>        | <b>50</b>        |
| 'RF'              | '80.81% ± 3.66%'        | '84.71% ± 3.43%' | '85.99% ± 3.47%' | '87.98% ± 3.18%' | '88.53% ± 3.32%' |
| 'PLS-DA'          | '67.82% ± 3.8%'         | '66.63% ± 3.35%' | '68.96% ± 3.44%' | '70.22% ± 3.64%' | '70.13% ± 3.37%' |
| 'SVM'             | '77.49% ± 4.18%'        | '84.37% ± 3.89%' | '85.15% ± 3.72%' | '88.17% ± 3.39%' | '90.15% ± 3.16%' |
| 'RLR'             | '73.23% ± 3.87%'        | '78.39% ± 4.06%' | '83.03% ± 3.86%' | '82.64% ± 3.88%' | '81.79% ± 3.97%' |
| 'kNN'             | '75.55% ± 4.41%'        | '81.52% ± 3.99%' | '87% ± 3.48%'    | '87.88% ± 3.27%' | '87.72% ± 3.4%'  |

|                    |                           |                  |                  |                  |                  |
|--------------------|---------------------------|------------------|------------------|------------------|------------------|
| <b>Specificity</b> | mean specificity ± 95% CI |                  |                  |                  |                  |
| <b>Classifier</b>  | <b>5</b>                  | <b>10</b>        | <b>20</b>        | <b>40</b>        | <b>50</b>        |
| 'RF'               | '91.99% ± 1.67%'          | '93.68% ± 1.51%' | '94.31% ± 1.45%' | '95.36% ± 1.25%' | '95.79% ± 1.21%' |
| 'PLS-DA'           | '78.58% ± 3.31%'          | '78.68% ± 2.82%' | '80.12% ± 2.87%' | '81.19% ± 2.84%' | '81.17% ± 2.88%' |
| 'SVM'              | '91.52% ± 1.84%'          | '94.39% ± 1.42%' | '94.71% ± 1.28%' | '95.59% ± 1.35%' | '96.63% ± 1.05%' |
| 'RLR'              | '89.47% ± 1.88%'          | '91.14% ± 1.75%' | '93.39% ± 1.47%' | '92.88% ± 1.61%' | '92.52% ± 1.71%' |
| 'kNN'              | '91.09% ± 1.58%'          | '92.64% ± 1.7%'  | '95.34% ± 1.2%'  | '95.47% ± 1.22%' | '95.69% ± 1.22%' |

|                   |                   |           |           |           |           |
|-------------------|-------------------|-----------|-----------|-----------|-----------|
| <b>NPV</b>        | mean NPV ± 95% CI |           |           |           |           |
| <b>Classifier</b> | <b>5</b>          | <b>10</b> | <b>20</b> | <b>40</b> | <b>50</b> |



|          |                  |                  |                  |                  |                  |
|----------|------------------|------------------|------------------|------------------|------------------|
| 'RF'     | '92.13% ± 1.41%' | '92.58% ± 1.49%' | '92.63% ± 1.43%' | '92.41% ± 1.38%' | '92.19% ± 1.41%' |
| 'PLS-DA' | '99.82% ± 0.25%' | '99.62% ± 0.37%' | '99.71% ± 0.33%' | '99.34% ± 0.54%' | '99.26% ± 0.55%' |
| 'SVM'    | '88.71% ± 1.54%' | '90.29% ± 1.58%' | '91.86% ± 1.51%' | '91.37% ± 1.51%' | '91.36% ± 1.43%' |
| 'RLR'    | '88.81% ± 1.63%' | '91.07% ± 1.58%' | '92.16% ± 1.45%' | '91.94% ± 1.45%' | '91.3% ± 1.5%'   |
| 'kNN'    | '90.27% ± 1.62%' | '90.92% ± 1.51%' | '91.25% ± 1.51%' | '91.95% ± 1.44%' | '91.6% ± 1.54%'  |

| F1         | mean F1 ± 95% CI |                  |                  |                  |                  |
|------------|------------------|------------------|------------------|------------------|------------------|
| Classifier | 5                | 10               | 20               | 40               | 50               |
| 'RF'       | '76.87% ± 3.42%' | '79.92% ± 3.24%' | '79.99% ± 3.37%' | '80.97% ± 3.13%' | '80.15% ± 3.41%' |
| 'PLS-DA'   | '78.87% ± 2.62%' | '78.07% ± 2.2%'  | '79.91% ± 2.28%' | '79.98% ± 2.33%' | '79.74% ± 2.17%' |
| 'SVM'      | '69.69% ± 3.66%' | '75.29% ± 3.52%' | '78.65% ± 3.43%' | '78.26% ± 3.57%' | '79.53% ± 3.41%' |
| 'RLR'      | '67.58% ± 3.63%' | '74.25% ± 3.24%' | '79.23% ± 2.99%' | '77.77% ± 3%'    | '75.53% ± 3.58%' |
| 'kNN'      | '72.41% ± 3.69%' | '75.49% ± 3.18%' | '77.97% ± 3.4%'  | '79.58% ± 3.43%' | '79.72% ± 3.47%' |

#### Variance

| Accuracy   | mean accuracy ± 95% CI |                  |                  |                  |                  |
|------------|------------------------|------------------|------------------|------------------|------------------|
| Classifier | 5                      | 10               | 20               | 40               | 50               |
| 'RF'       | '64.46% ± 2.5%'        | '71.92% ± 3.1%'  | '81.15% ± 1.92%' | '82.92% ± 1.85%' | '82.08% ± 1.98%' |
| 'PLS-DA'   | '85.77% ± 2.16%'       | '85.46% ± 1.97%' | '81% ± 2.28%'    | '76.08% ± 2.39%' | '79% ± 2.27%'    |
| 'SVM'      | '71.92% ± 1.18%'       | '72.77% ± 2.28%' | '76.46% ± 2.52%' | '86.08% ± 2.18%' | '85.77% ± 2.15%' |
| 'RLR'      | '67.15% ± 1.82%'       | '70.23% ± 1.99%' | '78.69% ± 2.11%' | '87.08% ± 2.05%' | '87.77% ± 1.88%' |
| 'kNN'      | '67.62% ± 2.41%'       | '67.23% ± 2.18%' | '78.08% ± 2.25%' | '81.08% ± 2.33%' | '81.38% ± 2.07%' |

| Recall     | mean recall ± 95% CI |                  |                  |                  |                  |
|------------|----------------------|------------------|------------------|------------------|------------------|
| Classifier | 5                    | 10               | 20               | 40               | 50               |
| 'RF'       | '42.75% ± 5.97%'     | '50.92% ± 5.73%' | '61.42% ± 5.05%' | '60.25% ± 5.38%' | '59.33% ± 5.58%' |
| 'PLS-DA'   | '95.92% ± 1.94%'     | '98.42% ± 1.24%' | '98.42% ± 1.24%' | '99.75% ± 0.49%' | '100% ± 0%'      |
| 'SVM'      | '0.58% ± 0.81%'      | '46.75% ± 5.67%' | '61.58% ± 5.31%' | '78.17% ± 4.22%' | '78% ± 4.65%'    |
| 'RLR'      | '5.33% ± 2.55%'      | '22.58% ± 5.08%' | '54.5% ± 4.86%'  | '79.33% ± 4.19%' | '80.75% ± 4.17%' |
| 'kNN'      | '37.33% ± 4.7%'      | '33.67% ± 4.99%' | '58.25% ± 4.72%' | '73% ± 4.57%'    | '73% ± 4.17%'    |

| Precision  | mean precision ± 95% CI |                  |                  |                  |                  |
|------------|-------------------------|------------------|------------------|------------------|------------------|
| Classifier | 5                       | 10               | 20               | 40               | 50               |
| 'RF'       | '35.83% ± 4.69%'        | '51.4% ± 5.95%'  | '70.12% ± 4.68%' | '75.68% ± 4.5%'  | '73.12% ± 5.05%' |
| 'PLS-DA'   | '72.43% ± 3.84%'        | '69.62% ± 3.69%' | '63.49% ± 3.61%' | '56.25% ± 3.05%' | '59.52% ± 3.26%' |
| 'SVM'      | '7.14% ± 2.39%'         | '52.08% ± 5.51%' | '60.33% ± 5.31%' | '75.67% ± 4.33%' | '74.89% ± 4.27%' |
| 'RLR'      | '12.5% ± 4.74%'         | '41.79% ± 7.4%'  | '68.48% ± 5.17%' | '77.49% ± 4.05%' | '77.47% ± 4.04%' |
| 'kNN'      | '43.7% ± 5.84%'         | '38.96% ± 5.43%' | '63.18% ± 5.19%' | '65.6% ± 4.41%'  | '66.58% ± 4.36%' |

| Specificity | mean specificity ± 95% CI |                  |                  |                  |                  |
|-------------|---------------------------|------------------|------------------|------------------|------------------|
| Classifier  | 5                         | 10               | 20               | 40               | 50               |
| 'RF'        | '72.41% ± 2.87%'          | '79.79% ± 3.16%' | '88.4% ± 2.06%'  | '91.36% ± 1.76%' | '90.47% ± 2%'    |
| 'PLS-DA'    | '82.08% ± 3.25%'          | '80.87% ± 2.78%' | '74.63% ± 3.27%' | '67.28% ± 3.35%' | '71.24% ± 3.13%' |
| 'SVM'       | '98.23% ± 1.44%'          | '82.06% ± 2.81%' | '81.82% ± 2.92%' | '88.93% ± 2.22%' | '88.64% ± 2.1%'  |
| 'RLR'       | '89.97% ± 2.38%'          | '87.93% ± 2.55%' | '87.74% ± 2.47%' | '89.87% ± 2.1%'  | '90.28% ± 1.86%' |

|       |                  |                  |                  |                  |                  |
|-------|------------------|------------------|------------------|------------------|------------------|
| 'kNN' | '79.06% ± 3.13%' | '79.99% ± 2.55%' | '85.26% ± 2.24%' | '84.21% ± 2.32%' | '84.46% ± 2.19%' |
|-------|------------------|------------------|------------------|------------------|------------------|

| NPV        | mean NPV ± 95% CI |                  |                  |                  |                  |
|------------|-------------------|------------------|------------------|------------------|------------------|
| Classifier | 5                 | 10               | 20               | 40               | 50               |
| 'RF'       | '77.89% ± 2.14%'  | '81.5% ± 2.37%'  | '86.79% ± 1.68%' | '86.75% ± 1.7%'  | '86.39% ± 1.75%' |
| 'PLS-DA'   | '98.54% ± 0.69%'  | '99.41% ± 0.46%' | '99.41% ± 0.46%' | '99.9% ± 0.2%'   | '100% ± 0%'      |
| 'SVM'      | '72.77% ± 0.81%'  | '81.56% ± 1.79%' | '85.89% ± 1.85%' | '91.95% ± 1.55%' | '92.08% ± 1.65%' |
| 'RLR'      | '71.88% ± 1.17%'  | '75.79% ± 1.52%' | '84.33% ± 1.6%'  | '92.49% ± 1.51%' | '93.24% ± 1.45%' |
| 'kNN'      | '77.33% ± 1.71%'  | '76.79% ± 1.66%' | '85.07% ± 1.62%' | '89.76% ± 1.78%' | '89.75% ± 1.53%' |

| F1         | mean F1 ± 95% CI |                  |                  |                  |                  |
|------------|------------------|------------------|------------------|------------------|------------------|
| Classifier | 5                | 10               | 20               | 40               | 50               |
| 'RF'       | '46.3% ± 3.07%'  | '55.97% ± 3.91%' | '63.87% ± 3.54%' | '64.85% ± 3.84%' | '65.25% ± 3.72%' |
| 'PLS-DA'   | '80.13% ± 2.25%' | '79.75% ± 2.38%' | '75.28% ± 2.38%' | '70.68% ± 2.31%' | '73.36% ± 2.41%' |
| 'SVM'      | '26.79% ± 0.49%' | '53.62% ± 3.36%' | '60.38% ± 3.76%' | '75.11% ± 3.76%' | '74.78% ± 3.8%'  |
| 'RLR'      | '36.31% ± 1.88%' | '46.84% ± 2.99%' | '59.79% ± 3.25%' | '76.56% ± 3.59%' | '77.45% ± 3.53%' |
| 'kNN'      | '43.66% ± 3.04%' | '43.63% ± 3.07%' | '60.81% ± 3.59%' | '67.91% ± 3.67%' | '68.39% ± 3.31%' |

#### Genetic Algorithm: PopSize = 50, Max NumGen= 35

| Accuracy   | accuracy |          |          |          |          |
|------------|----------|----------|----------|----------|----------|
| Classifier | 5        | 10       | 20       | 40       | 50       |
| 'RF'       | '92.31%' | '92.31%' | '84.62%' | '92.31%' | '76.92%' |
| 'PLS-DA'   | '92.31%' | '92.31%' | '84.62%' | '100%'   | '76.92%' |
| 'SVM'      | '92.31%' | '84.62%' | '100%'   | '84.62%' | '92.31%' |
| 'RLR'      | '92.31%' | '92.31%' | '100%'   | '84.62%' | '92.31%' |
| 'kNN'      | '76.92%' | '92.31%' | '92.31%' | '84.62%' | '92.31%' |

| Recall     | recall |        |        |        |        |
|------------|--------|--------|--------|--------|--------|
| Classifier | 5      | 10     | 20     | 40     | 50     |
| 'RF'       | '75%'  | '75%'  | '50%'  | '75%'  | '50%'  |
| 'PLS-DA'   | '100%' | '100%' | '100%' | '100%' | '100%' |
| 'SVM'      | '75%'  | '75%'  | '100%' | '75%'  | '100%' |
| 'RLR'      | '75%'  | '75%'  | '100%' | '100%' | '75%'  |
| 'kNN'      | '75%'  | '100%' | '100%' | '75%'  | '100%' |

| Precision  | precision |        |          |          |          |
|------------|-----------|--------|----------|----------|----------|
| Classifier | 5         | 10     | 20       | 40       | 50       |
| 'RF'       | '100%'    | '100%' | '100%'   | '100%'   | '66.67%' |
| 'PLS-DA'   | '80%'     | '80%'  | '66.67%' | '100%'   | '57.14%' |
| 'SVM'      | '100%'    | '75%'  | '100%'   | '75%'    | '80%'    |
| 'RLR'      | '100%'    | '100%' | '100%'   | '66.67%' | '100%'   |
| 'kNN'      | '60%'     | '80%'  | '80%'    | '75%'    | '80%'    |

| Specificity | specificity |    |    |    |    |
|-------------|-------------|----|----|----|----|
| Classifier  | 5           | 10 | 20 | 40 | 50 |

|          |          |          |          |          |          |
|----------|----------|----------|----------|----------|----------|
| 'RF'     | '100%'   | '100%'   | '100%'   | '100%'   | '88.89%' |
| 'PLS-DA' | '88.89%' | '88.89%' | '77.78%' | '100%'   | '66.67%' |
| 'SVM'    | '100%'   | '88.89%' | '100%'   | '88.89%' | '88.89%' |
| 'RLR'    | '100%'   | '100%'   | '100%'   | '77.78%' | '100%'   |
| 'kNN'    | '77.78%' | '88.89%' | '88.89%' | '88.89%' | '88.89%' |

| NPV        |  | NPV     |          |          |          |        |
|------------|--|---------|----------|----------|----------|--------|
| Classifier |  | 5       | 10       | 20       | 40       | 50     |
| 'RF'       |  | '90%'   | '90%'    | '81.82%' | '90%'    | '80%'  |
| 'PLS-DA'   |  | '100%'  | '100%'   | '100%'   | '100%'   | '100%' |
| 'SVM'      |  | '90%'   | '88.89%' | '100%'   | '88.89%' | '100%' |
| 'RLR'      |  | '90%'   | '90%'    | '100%'   | '100%'   | '90%'  |
| 'kNN'      |  | '87.5%' | '100%'   | '100%'   | '88.89%' | '100%' |

| F1         |  | F1       |          |          |          |          |
|------------|--|----------|----------|----------|----------|----------|
| Classifier |  | 5        | 10       | 20       | 40       | 50       |
| 'RF'       |  | '85.71%' | '85.71%' | '66.67%' | '85.71%' | '57.14%' |
| 'PLS-DA'   |  | '88.89%' | '88.89%' | '80%'    | '100%'   | '72.73%' |
| 'SVM'      |  | '85.71%' | '75%'    | '100%'   | '75%'    | '88.89%' |
| 'RLR'      |  | '85.71%' | '85.71%' | '100%'   | '80%'    | '85.71%' |
| 'kNN'      |  | '66.67%' | '88.89%' | '88.89%' | '75%'    | '88.89%' |

| Number of Generations |  |    |    |    |    |    |
|-----------------------|--|----|----|----|----|----|
| Classifier            |  | 5  | 10 | 20 | 40 | 50 |
| 'RF'                  |  | 35 | 35 | 35 | 35 | 35 |
| 'PLS-DA'              |  | 35 | 35 | 35 | 35 | 35 |
| 'SVM'                 |  | 35 | 35 | 35 | 35 | 35 |
| 'RLR'                 |  | 35 | 35 | 35 | 35 | 35 |
| 'kNN'                 |  | 35 | 35 | 35 | 35 | 35 |

This means that in all cases the algorithm stopped after reaching the max number of generations

#### Genetic Algorithm: PopSize = 200, Max Num Gen = 150

| Accuracy   |  | accuracy |          |          |          |          |
|------------|--|----------|----------|----------|----------|----------|
| Classifier |  | 5        | 10       | 20       | 40       | 50       |
| 'RF'       |  | '69.23%' | '76.92%' | '92.31%' | '92.31%' | '84.62%' |
| 'PLS-DA'   |  | '100%'   | '92.31%' | '92.31%' | '84.62%' | '92.31%' |
| 'SVM'      |  | '84.62%' | '100%'   | '84.62%' | '92.31%' | '100%'   |
| 'RLR'      |  | '76.92%' | '84.62%' | '100%'   | '92.31%' | '92.31%' |
| 'kNN'      |  | '76.92%' | '100%'   | '92.31%' | '100%'   | '92.31%' |

| Recall     |  | recall |        |        |        |        |
|------------|--|--------|--------|--------|--------|--------|
| Classifier |  | 5      | 10     | 20     | 40     | 50     |
| 'RF'       |  | '75%'  | '25%'  | '75%'  | '75%'  | '50%'  |
| 'PLS-DA'   |  | '100%' | '100%' | '100%' | '100%' | '100%' |
| 'SVM'      |  | '75%'  | '100%' | '75%'  | '75%'  | '100%' |

|       |       |        |        |        |        |
|-------|-------|--------|--------|--------|--------|
| 'RLR' | '50%' | '100%' | '100%' | '75%'  | '75%'  |
| 'kNN' | '75%' | '100%' | '100%' | '100%' | '100%' |

| Precision  | precision |          |        |          |        |
|------------|-----------|----------|--------|----------|--------|
| Classifier | 5         | 10       | 20     | 40       | 50     |
| 'RF'       | '50%'     | '100%'   | '100%' | '100%'   | '100%' |
| 'PLS-DA'   | '100%'    | '80%'    | '80%'  | '66.67%' | '80%'  |
| 'SVM'      | '75%'     | '100%'   | '75%'  | '100%'   | '100%' |
| 'RLR'      | '66.67%'  | '66.67%' | '100%' | '100%'   | '100%' |
| 'kNN'      | '60%'     | '100%'   | '80%'  | '100%'   | '80%'  |

| Specificity | specificity |          |          |          |          |
|-------------|-------------|----------|----------|----------|----------|
| Classifier  | 5           | 10       | 20       | 40       | 50       |
| 'RF'        | '66.67%'    | '100%'   | '100%'   | '100%'   | '100%'   |
| 'PLS-DA'    | '100%'      | '88.89%' | '88.89%' | '77.78%' | '88.89%' |
| 'SVM'       | '88.89%'    | '100%'   | '88.89%' | '100%'   | '100%'   |
| 'RLR'       | '88.89%'    | '77.78%' | '100%'   | '100%'   | '100%'   |
| 'kNN'       | '77.78%'    | '100%'   | '88.89%' | '100%'   | '88.89%' |

| NPV        | NPV      |        |          |        |          |
|------------|----------|--------|----------|--------|----------|
| Classifier | 5        | 10     | 20       | 40     | 50       |
| 'RF'       | '85.71%' | '75%'  | '90%'    | '90%'  | '81.82%' |
| 'PLS-DA'   | '100%'   | '100%' | '100%'   | '100%' | '100%'   |
| 'SVM'      | '88.89%' | '100%' | '88.89%' | '90%'  | '100%'   |
| 'RLR'      | '80%'    | '100%' | '100%'   | '90%'  | '90%'    |
| 'kNN'      | '87.5%'  | '100%' | '100%'   | '100%' | '100%'   |

| F1         | F1       |          |          |          |          |
|------------|----------|----------|----------|----------|----------|
| Classifier | 5        | 10       | 20       | 40       | 50       |
| 'RF'       | '60%'    | '40%'    | '85.71%' | '85.71%' | '66.67%' |
| 'PLS-DA'   | '100%'   | '88.89%' | '88.89%' | '80%'    | '88.89%' |
| 'SVM'      | '75%'    | '100%'   | '75%'    | '85.71%' | '100%'   |
| 'RLR'      | '57.14%' | '80%'    | '100%'   | '85.71%' | '85.71%' |
| 'kNN'      | '66.67%' | '100%'   | '88.89%' | '100%'   | '88.89%' |

| Number of Generations |     |     |     |     |     |
|-----------------------|-----|-----|-----|-----|-----|
| Classifier            | 5   | 10  | 20  | 40  | 50  |
| 'RF'                  | 60  | 63  | 72  | 57  | 58  |
| 'PLS-DA'              | 63  | 65  | 64  | 65  | 66  |
| 'SVM'                 | 58  | 56  | 51  | 53  | 53  |
| 'RLR'                 | 150 | 150 | 150 | 128 | 150 |
| 'kNN'                 | 51  | 51  | 51  | 51  | 51  |

## Rsp100\_FeaturesSets\_GLI\_85

| mRMR       |                            |                      |                      |                      |                      |                      |                      |  |
|------------|----------------------------|----------------------|----------------------|----------------------|----------------------|----------------------|----------------------|--|
| Classifier | Accuracy                   |                      |                      |                      |                      |                      |                      |  |
|            | mean accuracy $\pm$ 95% CI |                      |                      |                      |                      |                      |                      |  |
|            | 20%                        | 30%                  | 40%                  | 50%                  | 60%                  | 70%                  | 80%                  |  |
| 'RF'       | '89.08% $\pm$ 1.81%'       | '89% $\pm$ 1.65%'    | '88.54% $\pm$ 1.86%' | '88.31% $\pm$ 1.77%' | '88.15% $\pm$ 1.75%' | '88.62% $\pm$ 1.75%' | '88.77% $\pm$ 1.58%' |  |
| 'PLS-DA'   | '86.23% $\pm$ 1.96%'       | '85.54% $\pm$ 1.85%' | '85.46% $\pm$ 2.13%' | '86% $\pm$ 1.73%'    | '86.46% $\pm$ 1.68%' | '86.85% $\pm$ 1.76%' | '85.46% $\pm$ 1.87%' |  |
| 'SVM'      | '91.15% $\pm$ 1.61%'       | '91.38% $\pm$ 1.59%' | '90.77% $\pm$ 1.63%' | '91% $\pm$ 1.6%'     | '91.23% $\pm$ 1.52%' | '91.31% $\pm$ 1.6%'  | '91.31% $\pm$ 1.63%' |  |
| 'RLR'      | '86.15% $\pm$ 1.67%'       | '85.77% $\pm$ 1.64%' | '85.23% $\pm$ 1.7%'  | '85.38% $\pm$ 1.57%' | '85% $\pm$ 1.75%'    | '84.85% $\pm$ 1.72%' | '85.15% $\pm$ 1.65%' |  |
| 'kNN'      | '90.77% $\pm$ 1.48%'       | '89% $\pm$ 1.62%'    | '88.77% $\pm$ 1.58%' | '87.31% $\pm$ 1.97%' | '87.77% $\pm$ 1.67%' | '88.08% $\pm$ 1.84%' | '86.54% $\pm$ 2.06%' |  |

  

| Recall     |                          |                      |                      |                      |                      |                      |                      |  |
|------------|--------------------------|----------------------|----------------------|----------------------|----------------------|----------------------|----------------------|--|
| Classifier | Recall                   |                      |                      |                      |                      |                      |                      |  |
|            | mean recall $\pm$ 95% CI |                      |                      |                      |                      |                      |                      |  |
|            | 20%                      | 30%                  | 40%                  | 50%                  | 60%                  | 70%                  | 80%                  |  |
| 'RF'       | '70.33% $\pm$ 5.17%'     | '68.83% $\pm$ 5.07%' | '66.08% $\pm$ 5.47%' | '67.58% $\pm$ 5.23%' | '66.08% $\pm$ 5.26%' | '68% $\pm$ 5.36%'    | '66.67% $\pm$ 5.16%' |  |
| 'PLS-DA'   | '97.75% $\pm$ 1.72%'     | '98.5% $\pm$ 1.17%'  | '98.5% $\pm$ 1.17%'  | '98% $\pm$ 1.34%'    | '98% $\pm$ 1.34%'    | '98% $\pm$ 1.34%'    | '98.75% $\pm$ 1.07%' |  |
| 'SVM'      | '78.17% $\pm$ 4.41%'     | '78% $\pm$ 4.31%'    | '76.25% $\pm$ 4.78%' | '77.17% $\pm$ 4.55%' | '77.67% $\pm$ 4.32%' | '76.83% $\pm$ 4.47%' | '76.33% $\pm$ 4.64%' |  |
| 'RLR'      | '69.17% $\pm$ 4.87%'     | '67.25% $\pm$ 4.93%' | '65.58% $\pm$ 5.22%' | '66% $\pm$ 4.99%'    | '65.67% $\pm$ 4.93%' | '65.25% $\pm$ 5%'    | '64.92% $\pm$ 4.84%' |  |
| 'kNN'      | '83.75% $\pm$ 3.81%'     | '79.92% $\pm$ 3.79%' | '79.92% $\pm$ 4.21%' | '77.33% $\pm$ 4.49%' | '77.5% $\pm$ 4.2%'   | '77.17% $\pm$ 4.57%' | '77.17% $\pm$ 4.54%' |  |

  

| Precision  |                             |                      |                      |                      |                      |                      |                      |  |
|------------|-----------------------------|----------------------|----------------------|----------------------|----------------------|----------------------|----------------------|--|
| Classifier | Precision                   |                      |                      |                      |                      |                      |                      |  |
|            | mean precision $\pm$ 95% CI |                      |                      |                      |                      |                      |                      |  |
|            | 20%                         | 30%                  | 40%                  | 50%                  | 60%                  | 70%                  | 80%                  |  |
| 'RF'       | '89.66% $\pm$ 3.82%'        | '89.05% $\pm$ 4.24%' | '88.72% $\pm$ 4.75%' | '89.35% $\pm$ 3.68%' | '88.3% $\pm$ 4.24%'  | '88.94% $\pm$ 4.16%' | '90.95% $\pm$ 3.39%' |  |
| 'PLS-DA'   | '71.42% $\pm$ 3.69%'        | '69.51% $\pm$ 3.43%' | '70.08% $\pm$ 3.65%' | '70.33% $\pm$ 3.39%' | '70.89% $\pm$ 3.34%' | '71.88% $\pm$ 3.56%' | '69.46% $\pm$ 3.55%' |  |
| 'SVM'      | '89.05% $\pm$ 3.38%'        | '89.53% $\pm$ 3.43%' | '88.32% $\pm$ 3.76%' | '88.78% $\pm$ 3.78%' | '88.87% $\pm$ 3.7%'  | '89.8% $\pm$ 3.79%'  | '90.27% $\pm$ 3.75%' |  |
| 'RLR'      | '80.49% $\pm$ 4.1%'         | '79.95% $\pm$ 4.13%' | '79.36% $\pm$ 4.65%' | '79.01% $\pm$ 4.34%' | '78.47% $\pm$ 4.57%' | '78.85% $\pm$ 4.5%'  | '80.15% $\pm$ 4.15%' |  |
| 'kNN'      | '85.42% $\pm$ 3.23%'        | '82.97% $\pm$ 3.52%' | '82.08% $\pm$ 3.37%' | '80.45% $\pm$ 4.06%' | '81.51% $\pm$ 3.53%' | '82.27% $\pm$ 3.79%' | '77.01% $\pm$ 3.99%' |  |

  

| Specificity |                               |                      |                      |                      |                      |                      |                      |  |
|-------------|-------------------------------|----------------------|----------------------|----------------------|----------------------|----------------------|----------------------|--|
| Classifier  | Specificity                   |                      |                      |                      |                      |                      |                      |  |
|             | mean specificity $\pm$ 95% CI |                      |                      |                      |                      |                      |                      |  |
|             | 20%                           | 30%                  | 40%                  | 50%                  | 60%                  | 70%                  | 80%                  |  |
| 'RF'        | '96.3% $\pm$ 1.27%'           | '96.68% $\pm$ 1.15%' | '97.03% $\pm$ 1.07%' | '96.31% $\pm$ 1.27%' | '96.66% $\pm$ 1.14%' | '96.62% $\pm$ 1.19%' | '97.2% $\pm$ 1%'     |  |
| 'PLS-DA'    | '82.21% $\pm$ 2.78%'          | '80.83% $\pm$ 2.64%' | '80.74% $\pm$ 3.03%' | '81.69% $\pm$ 2.53%' | '82.34% $\pm$ 2.45%' | '82.92% $\pm$ 2.53%' | '80.61% $\pm$ 2.65%' |  |
| 'SVM'       | '96.09% $\pm$ 1.1%'           | '96.43% $\pm$ 1.07%' | '96.33% $\pm$ 0.99%' | '96.31% $\pm$ 1.08%' | '96.42% $\pm$ 0.98%' | '96.87% $\pm$ 1.03%' | '97.08% $\pm$ 0.97%' |  |
| 'RLR'       | '92.73% $\pm$ 1.58%'          | '92.92% $\pm$ 1.48%' | '92.82% $\pm$ 1.55%' | '92.82% $\pm$ 1.44%' | '92.4% $\pm$ 1.61%'  | '92.38% $\pm$ 1.59%' | '92.94% $\pm$ 1.55%' |  |

|                   |                      |                     |                     |                     |                     |                     |                     |
|-------------------|----------------------|---------------------|---------------------|---------------------|---------------------|---------------------|---------------------|
| 'kNN'             | '93.63% ±<br>1.53%'  | '92.66% ±<br>1.64%' | '92.46% ±<br>1.58%' | '91.31% ±<br>1.97%' | '91.9% ±<br>1.82%'  | '92.42% ±<br>1.72%' | '90.41% ±<br>1.83%' |
| <b>NPV</b>        | mean NPV ±<br>95% CI |                     |                     |                     |                     |                     |                     |
| <b>Classifier</b> | <b>20%</b>           | <b>30%</b>          | <b>40%</b>          | <b>50%</b>          | <b>60%</b>          | <b>70%</b>          | <b>80%</b>          |
| 'RF'              | '90.13% ±<br>1.7%'   | '89.87% ±<br>1.62%' | '89.02% ±<br>1.73%' | '89.27% ±<br>1.68%' | '88.93% ±<br>1.68%' | '89.45% ±<br>1.71%' | '89.21% ±<br>1.59%' |
| 'PLS-DA'          | '99.14% ±<br>0.65%'  | '99.4% ±<br>0.47%'  | '99.4% ±<br>0.47%'  | '99.2% ±<br>0.53%'  | '99.2% ±<br>0.53%'  | '99.2% ±<br>0.53%'  | '99.5% ±<br>0.43%'  |
| 'SVM'             | '92.56% ±<br>1.51%'  | '92.56% ±<br>1.46%' | '92.05% ±<br>1.59%' | '92.28% ±<br>1.54%' | '92.4% ±<br>1.45%'  | '92.17% ±<br>1.5%'  | '92.04% ±<br>1.54%' |
| 'RLR'             | '89.58% ±<br>1.64%'  | '88.95% ±<br>1.63%' | '88.51% ±<br>1.69%' | '88.67% ±<br>1.62%' | '88.43% ±<br>1.62%' | '88.26% ±<br>1.64%' | '88.19% ±<br>1.58%' |
| 'kNN'             | '94.17% ±<br>1.34%'  | '92.66% ±<br>1.4%'  | '92.7% ±<br>1.51%'  | '91.87% ±<br>1.66%' | '91.91% ±<br>1.51%' | '91.91% ±<br>1.69%' | '91.48% ±<br>1.76%' |

|                   |                     |                     |                     |                     |                     |                     |                     |
|-------------------|---------------------|---------------------|---------------------|---------------------|---------------------|---------------------|---------------------|
| <b>F1</b>         | mean F1 ± 95%<br>CI |                     |                     |                     |                     |                     |                     |
| <b>Classifier</b> | <b>20%</b>          | <b>30%</b>          | <b>40%</b>          | <b>50%</b>          | <b>60%</b>          | <b>70%</b>          | <b>80%</b>          |
| 'RF'              | '77.93% ±<br>3.54%' | '77.06% ±<br>3.44%' | '76.79% ±<br>3.62%' | '76.27% ±<br>3.59%' | '76.09% ±<br>3.49%' | '78.3% ±<br>3.15%'  | '76.33% ±<br>3.52%' |
| 'PLS-DA'          | '80.54% ±<br>2.39%' | '79.93% ±<br>2.19%' | '80.15% ±<br>2.38%' | '80.25% ±<br>2.08%' | '80.68% ±<br>2.04%' | '81.22% ±<br>2.19%' | '79.96% ±<br>2.28%' |
| 'SVM'             | '82.29% ±<br>3.15%' | '82.6% ±<br>3.14%'  | '81.45% ±<br>3.27%' | '82.44% ±<br>3.03%' | '83.04% ±<br>2.8%'  | '82.88% ±<br>3.03%' | '82.56% ±<br>3.22%' |
| 'RLR'             | '72.5% ±<br>3.28%'  | '71.19% ±<br>3.42%' | '71.01% ±<br>3.31%' | '70.72% ±<br>3.25%' | '69.81% ±<br>3.55%' | '69.35% ±<br>3.51%' | '69.04% ±<br>3.64%' |
| 'kNN'             | '82.56% ±<br>2.83%' | '79.43% ±<br>3%'    | '79.41% ±<br>2.87%' | '76.96% ±<br>3.24%' | '76.86% ±<br>3.08%' | '77.78% ±<br>3.12%' | '75.98% ±<br>3.37%' |

| Relief-F   | mean accuracy ±<br>95% CI |                     |                     |                     |                     |                     |                     |
|------------|---------------------------|---------------------|---------------------|---------------------|---------------------|---------------------|---------------------|
| Accuracy   |                           |                     |                     |                     |                     |                     |                     |
| Classifier | 20%                       | 30%                 | 40%                 | 50%                 | 60%                 | 70%                 | 80%                 |
| 'RF'       | '90% ± 1.6%'              | '89.62% ±<br>1.55%' | '89.46% ±<br>1.63%' | '89.54% ±<br>1.6%'  | '89% ±<br>1.74%'    | '89.38% ±<br>1.64%' | '88.54% ±<br>1.79%' |
| 'PLS-DA'   | '88.62% ±<br>1.84%'       | '88.46% ±<br>1.58%' | '89.23% ±<br>1.56%' | '88.69% ±<br>1.65%' | '87.92% ±<br>1.59%' | '87.38% ±<br>1.67%' | '86.46% ±<br>1.72%' |
| 'SVM'      | '91.92% ±<br>1.54%'       | '91.77% ±<br>1.44%' | '91.85% ±<br>1.47%' | '91.85% ±<br>1.45%' | '91.77% ±<br>1.47%' | '91.77% ±<br>1.53%' | '91.23% ±<br>1.65%' |
| 'RLR'      | '84.62% ±<br>1.77%'       | '85.31% ±<br>1.65%' | '84.92% ±<br>1.74%' | '84.92% ±<br>1.79%' | '84.92% ±<br>1.75%' | '85% ±<br>1.8%'     |                     |
| 'kNN'      | '91.54% ± 1.4%'           | '91% ±<br>1.44%'    | '90.54% ±<br>1.53%' | '90.31% ±<br>1.6%'  | '90.08% ±<br>1.59%' | '89.69% ±<br>1.72%' | '88.85% ±<br>1.76%' |

|                   |                         |                     |                     |                     |                     |                     |                     |
|-------------------|-------------------------|---------------------|---------------------|---------------------|---------------------|---------------------|---------------------|
| <b>Recall</b>     | mean recall ±<br>95% CI |                     |                     |                     |                     |                     |                     |
| <b>Classifier</b> | <b>20%</b>              | <b>30%</b>          | <b>40%</b>          | <b>50%</b>          | <b>60%</b>          | <b>70%</b>          | <b>80%</b>          |
| 'RF'              | '71.08% ±<br>5.21%'     | '69.33% ±<br>5.23%' | '67.67% ±<br>5.37%' | '67.08% ±<br>5.38%' | '68.17% ±<br>5.46%' | '68.67% ±<br>5.2%'  | '64.92% ±<br>5.44%' |
| 'PLS-DA'          | '98.25% ±<br>1.26%'     | '97.5% ±<br>1.48%'  | '98% ±<br>1.34%'    | '98.25% ±<br>1.26%' | '97.5% ±<br>1.48%'  | '97.5% ±<br>1.48%'  | '97.25% ±<br>1.54%' |
| 'SVM'             | '79.25% ±<br>4.32%'     | '77.75% ±<br>4.48%' | '77.92% ±<br>4.4%'  | '77.67% ±<br>4.38%' | '77.92% ±<br>4.35%' | '77.67% ±<br>4.38%' | '75.75% ±<br>4.79%' |
| 'RLR'             | '63.92% ±<br>4.63%'     | '62.75% ±<br>4.9%'  | '64.83% ±<br>4.73%' | '64.17% ±<br>5.01%' | '64% ±<br>5.02%'    | '64% ±<br>4.84%'    | '64.5% ±<br>4.88%'  |

|             |                              |                     |                     |                     |                     |                     |                     |                     |
|-------------|------------------------------|---------------------|---------------------|---------------------|---------------------|---------------------|---------------------|---------------------|
|             | 'kNN'                        | '78.33% ±<br>4.17%' | '78.92% ±<br>4.04%' | '79.17% ±<br>4.24%' | '79.17% ±<br>4.33%' | '79.33% ±<br>4.4%'  | '79.67% ±<br>4.19%' | '76.83% ±<br>4.53%' |
| Precision   | mean precision<br>± 95% CI   |                     |                     |                     |                     |                     |                     |                     |
| Classifier  | 20%                          | 30%                 | 40%                 | 50%                 | 60%                 | 70%                 | 80%                 |                     |
| 'RF'        | '91.65% ±<br>3.28%'          | '92.18% ±<br>2.83%' | '93.73% ±<br>2.58%' | '93.59% ±<br>3.04%' | '89.91% ±<br>4.09%' | '90.7% ±<br>3.71%'  | '90.12% ±<br>4.41%' |                     |
| 'PLS-DA'    | '75.3% ± 3.57%'              | '74.68% ±<br>3.29%' | '75.8% ±<br>3.34%'  | '74.73% ±<br>3.46%' | '73.57% ±<br>3.31%' | '73.12% ±<br>3.51%' | '71.67% ±<br>3.49%' |                     |
| 'SVM'       | '90.83% ±<br>3.24%'          | '91.17% ±<br>3.21%' | '91.33% ±<br>3.21%' | '91.62% ±<br>3.19%' | '91.03% ±<br>3.23%' | '90.62% ±<br>3.66%' | '90.43% ±<br>3.69%' |                     |
| 'RLR'       | '80.05% ±<br>4.49%'          | '79.05% ±<br>4.68%' | '80.77% ±<br>4.46%' | '79.57% ±<br>4.58%' | '79.65% ±<br>4.66%' | '79.33% ±<br>4.71%' | '79.5% ±<br>4.66%'  |                     |
| 'kNN'       | '91.23% ±<br>2.74%'          | '89.33% ±<br>3.07%' | '87.43% ±<br>3.13%' | '86.05% ±<br>3.19%' | '85.12% ±<br>3.26%' | '84.03% ±<br>3.54%' | '83.01% ±<br>3.54%' |                     |
| Specificity | mean specificity<br>± 95% CI |                     |                     |                     |                     |                     |                     |                     |
| Classifier  | 20%                          | 30%                 | 40%                 | 50%                 | 60%                 | 70%                 | 80%                 |                     |
| 'RF'        | '97.3% ± 0.98%'              | '97.3% ±<br>0.99%'  | '97.83% ±<br>0.93%' | '98.12% ±<br>0.79%' | '96.96% ±<br>1.25%' | '97.26% ±<br>0.91%' | '97.59% ±<br>0.92%' |                     |
| 'PLS-DA'    | '85.19% ±<br>2.63%'          | '85.27% ±<br>2.37%' | '86.17% ±<br>2.25%' | '85.38% ±<br>2.34%' | '84.56% ±<br>2.4%'  | '83.79% ±<br>2.49%' | '82.6% ±<br>2.61%'  |                     |
| 'SVM'       | '96.76% ±<br>1.04%'          | '97.08% ±<br>0.92%' | '97.18% ±<br>0.92%' | '97.29% ±<br>0.9%'  | '97.07% ±<br>0.93%' | '97.17% ±<br>0.92%' | '97.17% ±<br>0.92%' |                     |
| 'RLR'       | '93.14% ±<br>1.54%'          | '93.04% ±<br>1.56%' | '93.23% ±<br>1.57%' | '92.91% ±<br>1.59%' | '93.03% ±<br>1.59%' | '92.92% ±<br>1.61%' | '92.93% ±<br>1.61%' |                     |
| 'kNN'       | '96.63% ±<br>1.05%'          | '95.72% ±<br>1.27%' | '94.96% ±<br>1.29%' | '94.62% ±<br>1.27%' | '94.21% ±<br>1.32%' | '93.69% ±<br>1.44%' | '93.48% ±<br>1.43%' |                     |
| NPV         | mean NPV ±<br>95% CI         |                     |                     |                     |                     |                     |                     |                     |
| Classifier  | 20%                          | 30%                 | 40%                 | 50%                 | 60%                 | 70%                 | 80%                 |                     |
| 'RF'        | '90.57% ±<br>1.67%'          | '90.1% ±<br>1.62%'  | '89.64% ±<br>1.68%' | '89.43% ±<br>1.65%' | '89.75% ±<br>1.7%'  | '89.82% ±<br>1.66%' | '88.71% ±<br>1.75%' |                     |
| 'PLS-DA'    | '99.3% ± 0.5%'               | '99% ±<br>0.59%'    | '99.2% ±<br>0.53%'  | '99.3% ±<br>0.5%'   | '99% ±<br>0.59%'    | '99% ±<br>0.59%'    | '98.9% ±<br>0.62%'  |                     |
| 'SVM'       | '92.98% ±<br>1.46%'          | '92.6% ±<br>1.45%'  | '92.6% ±<br>1.46%'  | '92.51% ±<br>1.45%' | '92.56% ±<br>1.44%' | '92.47% ±<br>1.47%' | '91.9% ±<br>1.58%'  |                     |
| 'RLR'       | '87.79% ±<br>1.52%'          | '87.47% ±<br>1.61%' | '88.1% ±<br>1.54%'  | '87.95% ±<br>1.63%' | '87.85% ±<br>1.65%' | '87.88% ±<br>1.56%' | '87.98% ±<br>1.61%' |                     |
| 'kNN'       | '92.6% ± 1.44%'              | '92.7% ±<br>1.4%'   | '92.79% ±<br>1.48%' | '92.72% ±<br>1.51%' | '92.82% ±<br>1.5%'  | '92.72% ±<br>1.54%' | '91.82% ±<br>1.54%' |                     |
| F1          | mean F1 ± 95%<br>CI          |                     |                     |                     |                     |                     |                     |                     |
| Classifier  | 20%                          | 30%                 | 40%                 | 50%                 | 60%                 | 70%                 | 80%                 |                     |
| 'RF'        | '79.06% ±<br>3.47%'          | '76.92% ±<br>3.76%' | '77.4% ±<br>3.66%'  | '78.27% ±<br>3.4%'  | '78.58% ±<br>3.3%'  | '76.78% ±<br>3.71%' | '76.2% ±<br>3.6%'   |                     |
| 'PLS-DA'    | '83.66% ±<br>2.25%'          | '83.02% ±<br>1.94%' | '84.02% ±<br>2.03%' | '83.37% ±<br>2.15%' | '82.27% ±<br>1.93%' | '81.83% ±<br>2.07%' | '80.71% ±<br>2.01%' |                     |
| 'SVM'       | '83.71% ±<br>3.03%'          | '82.76% ±<br>3.16%' | '83.86% ±<br>2.85%' | '83.82% ±<br>2.82%' | '83.8% ±<br>2.83%'  | '83.86% ±<br>2.87%' | '82.12% ±<br>3.37%' |                     |
| 'RLR'       | '69.32% ±<br>3.37%'          | '68.18% ±<br>3.69%' | '70.04% ±<br>3.38%' | '68.97% ±<br>3.67%' | '68.98% ±<br>3.72%' | '69.17% ±<br>3.66%' | '69.39% ±<br>3.69%' |                     |
| 'kNN'       | '82.31% ±<br>2.97%'          | '81.71% ±<br>2.99%' | '80.91% ±<br>3.15%' | '80.55% ±<br>3.31%' | '80.83% ±<br>3.19%' | '80.12% ±<br>3.35%' | '79.1% ±<br>3.32%'  |                     |

### Chi-Squared

| Accuracy   | mean accuracy $\pm$ 95% CI |                      |                      |                      |                      |                      |                      |
|------------|----------------------------|----------------------|----------------------|----------------------|----------------------|----------------------|----------------------|
| Classifier | 20%                        | 30%                  | 40%                  | 50%                  | 60%                  | 70%                  | 80%                  |
| 'RF'       | '90.23% $\pm$ 1.51%'       | '89.69% $\pm$ 1.69%' | '88.31% $\pm$ 1.61%' | '89% $\pm$ 1.74%'    | '88.85% $\pm$ 1.77%' | '88.92% $\pm$ 1.66%' | '87.69% $\pm$ 1.87%' |
|            | '87.31% $\pm$ 1.94%'       | '87.62% $\pm$ 1.73%' | '86.62% $\pm$ 1.72%' | '87.46% $\pm$ 1.7%'  | '86.38% $\pm$ 1.99%' | '86.23% $\pm$ 1.87%' | '86.23% $\pm$ 1.82%' |
| 'PLS-DA'   | '90.92% $\pm$ 1.62%'       | '91.23% $\pm$ 1.67%' | '91.46% $\pm$ 1.59%' | '91.77% $\pm$ 1.55%' | '91.46% $\pm$ 1.62%' | '91.62% $\pm$ 1.55%' | '91.69% $\pm$ 1.5%'  |
|            | '85.69% $\pm$ 1.59%'       | '85.31% $\pm$ 1.74%' | '84.62% $\pm$ 1.75%' | '85.15% $\pm$ 1.78%' | '85.46% $\pm$ 1.77%' | '84.77% $\pm$ 1.78%' | '84.85% $\pm$ 1.82%' |
| 'RLR'      |                            | '88.62% $\pm$ 1.79%' | '87.62% $\pm$ 1.88%' | '88.23% $\pm$ 1.69%' | '87.69% $\pm$ 1.78%' | '87.92% $\pm$ 1.78%' | '87.31% $\pm$ 1.85%' |
|            | '89.46% $\pm$ 1.6%'        |                      |                      |                      |                      |                      |                      |
| 'kNN'      |                            |                      |                      |                      |                      |                      |                      |

| Recall     | mean recall $\pm$ 95% CI |                      |                      |                      |                      |                      |                      |
|------------|--------------------------|----------------------|----------------------|----------------------|----------------------|----------------------|----------------------|
| Classifier | 20%                      | 30%                  | 40%                  | 50%                  | 60%                  | 70%                  | 80%                  |
| 'RF'       | '73.33% $\pm$ 4.76%'     | '72.42% $\pm$ 5.06%' | '66.75% $\pm$ 5%'    | '67.83% $\pm$ 5.25%' | '67.92% $\pm$ 5.17%' | '68.08% $\pm$ 5.3%'  | '65.08% $\pm$ 5.23%' |
|            |                          | '98.25% $\pm$ 1.26%' | '98.75% $\pm$ 1.07%' | '98.25% $\pm$ 1.26%' | '99.25% $\pm$ 0.84%' | '98.5% $\pm$ 1.17%'  | '98.25% $\pm$ 1.26%' |
| 'PLS-DA'   | '98.5% $\pm$ 1.17%'      | '77.5% $\pm$ 4.42%'  | '77.25% $\pm$ 4.57%' | '78.25% $\pm$ 4.42%' | '77.08% $\pm$ 4.69%' | '76.75% $\pm$ 4.58%' | '77.17% $\pm$ 4.45%' |
|            |                          | '64.83% $\pm$ 5.02%' | '63.42% $\pm$ 4.79%' | '64.08% $\pm$ 4.76%' | '65.33% $\pm$ 4.86%' | '62.92% $\pm$ 4.93%' | '64% $\pm$ 4.98%'    |
| 'SVM'      |                          | '78.25% $\pm$ 4.6%'  | '76.25% $\pm$ 4.29%' | '76.58% $\pm$ 4.51%' | '78.08% $\pm$ 4.03%' | '79.17% $\pm$ 4.38%' | '77.67% $\pm$ 4.4%'  |
|            | '67% $\pm$ 4.8%'         |                      |                      |                      |                      |                      |                      |
| 'RLR'      |                          |                      |                      |                      |                      |                      |                      |
|            |                          |                      |                      |                      |                      |                      |                      |
| 'kNN'      |                          |                      |                      |                      |                      |                      |                      |

| Precision  | mean precision $\pm$ 95% CI |                      |                      |                      |                      |                      |                      |
|------------|-----------------------------|----------------------|----------------------|----------------------|----------------------|----------------------|----------------------|
| Classifier | 20%                         | 30%                  | 40%                  | 50%                  | 60%                  | 70%                  | 80%                  |
| 'RF'       | '91.01% $\pm$ 2.87%'        | '88.1% $\pm$ 4.11%'  | '89.58% $\pm$ 3.55%' | '89.95% $\pm$ 3.91%' | '91.03% $\pm$ 3.46%' | '89.34% $\pm$ 3.9%'  | '88.03% $\pm$ 4.21%' |
|            |                             | '72.78% $\pm$ 3.36%' | '70.68% $\pm$ 3.39%' | '72.45% $\pm$ 3.37%' | '70.62% $\pm$ 3.49%' | '70.67% $\pm$ 3.54%' | '70.71% $\pm$ 3.46%' |
| 'PLS-DA'   | '72.6% $\pm$ 3.5%'          | '89.45% $\pm$ 3.45%' | '90.62% $\pm$ 3.31%' | '90.45% $\pm$ 3.38%' | '89.9% $\pm$ 3.72%'  | '91.31% $\pm$ 3.26%' | '91.48% $\pm$ 3.22%' |
|            | '88.75% $\pm$ 3.48%'        | '80.17% $\pm$ 4.56%' | '79.3% $\pm$ 4.59%'  | '79.8% $\pm$ 4.64%'  | '80.07% $\pm$ 4.59%' | '78.73% $\pm$ 4.66%' | '78.82% $\pm$ 4.83%' |
| 'SVM'      |                             | '82.76% $\pm$ 3.64%' | '80.28% $\pm$ 3.79%' | '82.46% $\pm$ 3.62%' | '79.95% $\pm$ 3.66%' | '79.68% $\pm$ 3.88%' | '78.39% $\pm$ 3.69%' |
|            | '86.25% $\pm$ 3.35%'        |                      |                      |                      |                      |                      |                      |
| 'RLR'      |                             |                      |                      |                      |                      |                      |                      |
|            |                             |                      |                      |                      |                      |                      |                      |
| 'kNN'      |                             |                      |                      |                      |                      |                      |                      |

| Specificity | mean specificity $\pm$ 95% CI |                      |                      |                      |                      |                      |                      |
|-------------|-------------------------------|----------------------|----------------------|----------------------|----------------------|----------------------|----------------------|
| Classifier  | 20%                           | 30%                  | 40%                  | 50%                  | 60%                  | 70%                  | 80%                  |
| 'RF'        | '96.66% $\pm$ 1.13%'          | '96.23% $\pm$ 1.12%' | '96.54% $\pm$ 1.19%' | '97.08% $\pm$ 1.04%' | '96.84% $\pm$ 1.29%' | '96.76% $\pm$ 1.08%' | '96.22% $\pm$ 1.31%' |
|             | '83.36% $\pm$ 2.73%'          | '83.88% $\pm$ 2.45%' | '82.28% $\pm$ 2.44%' | '83.67% $\pm$ 2.42%' | '81.69% $\pm$ 2.8%'  | '81.84% $\pm$ 2.67%' | '81.89% $\pm$ 2.66%' |
| 'PLS-DA'    |                               | '96.53% $\pm$ 1.02%' | '96.86% $\pm$ 1%'    | '96.96% $\pm$ 0.94%' | '96.97% $\pm$ 0.94%' | '97.29% $\pm$ 0.9%'  | '97.29% $\pm$ 0.9%'  |
|             | '96% $\pm$ 1.13%'             | '93.22% $\pm$ 1.53%' | '92.8% $\pm$ 1.59%'  | '93.21% $\pm$ 1.56%' | '93.23% $\pm$ 1.55%' | '93.12% $\pm$ 1.49%' | '92.83% $\pm$ 1.63%' |
| 'SVM'       |                               | '92.76% $\pm$ 1.7%'  | '92.11% $\pm$ 1.68%' | '92.86% $\pm$ 1.59%' | '91.58% $\pm$ 1.73%' | '91.47% $\pm$ 1.76%' | '91.24% $\pm$ 1.62%' |
|             | '92.93% $\pm$ 1.61%'          |                      |                      |                      |                      |                      |                      |
| 'RLR'       |                               |                      |                      |                      |                      |                      |                      |
|             |                               |                      |                      |                      |                      |                      |                      |
| 'kNN'       |                               |                      |                      |                      |                      |                      |                      |

| NPV | mean NPV $\pm$ 95% CI |
|-----|-----------------------|
|-----|-----------------------|



| Classifier | 20%              | 30%              | 40%              | 50%              | 60%              | 70%              | 80%              |
|------------|------------------|------------------|------------------|------------------|------------------|------------------|------------------|
| 'RF'       | '91.16% ± 1.48%' | '90.92% ± 1.61%' | '89.14% ± 1.6%'  | '89.56% ± 1.67%' | '89.43% ± 1.64%' | '89.7% ± 1.64%'  | '88.64% ± 1.7%'  |
| 'PLS-DA'   | '99.4% ± 0.47%'  | 0.5%'            | 0.43%'           | 0.5%'            | 0.34%'           | 0.47%'           | 0.5%'            |
| 'SVM'      | '92.37% ± 1.53%' | '92.35% ± 1.57%' | '92.39% ± 1.53%' | '92.65% ± 1.5%'  | '92.33% ± 1.55%' | '92.26% ± 1.51%' | '92.32% ± 1.47%' |
| 'RLR'      | '88.87% ± 1.57%' | '88.17% ± 1.65%' | '87.6% ± 1.6%'   | '87.84% ± 1.57%' | '88.25% ± 1.59%' | '87.54% ± 1.61%' | '87.89% ± 1.62%' |
| 'kNN'      | '91.94% ± 1.55%' | '92.24% ± 1.58%' | '91.41% ± 1.63%' | '91.74% ± 1.59%' | '91.96% ± 1.54%' | '92.38% ± 1.68%' | '91.74% ± 1.63%' |

| F1         | mean F1 ± 95% CI |                  |                  |                  |                  |                  |                  |
|------------|------------------|------------------|------------------|------------------|------------------|------------------|------------------|
| Classifier | 20%              | 30%              | 40%              | 50%              | 60%              | 70%              | 80%              |
| 'RF'       | '80.4% ± 3.14%'  | 3.17%'           | 3.49%'           | 3.46%'           | 3.68%'           | 3.78%'           | 3.76%'           |
| 'PLS-DA'   | '82.01% ± 2.27%' | '82.11% ± 2.12%' | '80.94% ± 2.15%' | '81.88% ± 2.11%' | '81.1% ± 2.31%'  | '80.67% ± 2.26%' | '80.62% ± 2.14%' |
| 'SVM'      | '81.9% ± 3.15%'  | '82.11% ± 3.41%' | '82.28% ± 3.28%' | '83.16% ± 3.19%' | '82.87% ± 3.21%' | '83.02% ± 3.13%' | '83.41% ± 2.97%' |
| 'RLR'      | '70.45% ± 3.46%' | '69.79% ± 3.67%' | '68.57% ± 3.54%' | '69.68% ± 3.6%'  | '70.41% ± 3.64%' | '68.41% ± 3.78%' | '69% ± 3.8%'     |
| 'kNN'      | '78.65% ± 3.37%' | '79.22% ± 3.25%' | '76.42% ± 3.45%' | '77.66% ± 3.26%' | '77.23% ± 3.19%' | '78.42% ± 3.21%' | '76.91% ± 3.36%' |

| Variance | mean accuracy ± 95% CI |                  |                  |                  |                  |                  |                  |                  |
|----------|------------------------|------------------|------------------|------------------|------------------|------------------|------------------|------------------|
| Accuracy | Classifier             | 20%              | 30%              | 40%              | 50%              | 60%              | 70%              | 80%              |
|          | 'RF'                   | '87.69% ± 1.79%' | '87.69% ± 1.82%' | '87.77% ± 1.93%' | '88.08% ± 1.77%' | '89.15% ± 1.87%' | '88.46% ± 1.69%' | '88.54% ± 1.76%' |
|          | 'PLS-DA'               | '85.62% ± 1.72%' | '85.54% ± 1.87%' | '84.54% ± 1.85%' | '85.15% ± 1.85%' | '85.92% ± 1.82%' | '84.77% ± 2.06%' | '84.92% ± 1.89%' |
|          | 'SVM'                  | '90.31% ± 1.52%' | '91.31% ± 1.45%' | '90.77% ± 1.52%' | '90.46% ± 1.58%' | '91.08% ± 1.6%'  | '91.77% ± 1.5%'  | '92% ± 1.48%'    |
|          | 'RLR'                  | '89.08% ± 1.47%' | '88.85% ± 1.46%' | '87.77% ± 1.62%' | '88% ± 1.64%'    | '85.77% ± 1.59%' | '85.85% ± 1.53%' | '85.23% ± 1.61%' |
|          | 'kNN'                  | '91.08% ± 1.56%' | '90.08% ± 1.47%' | '88.54% ± 1.75%' | '87.92% ± 1.61%' | '87% ± 1.91%'    | '87.08% ± 1.93%' | '86.69% ± 1.75%' |

| Recall     | mean recall ± 95% CI |                  |                  |                  |                  |                  |                  |
|------------|----------------------|------------------|------------------|------------------|------------------|------------------|------------------|
| Classifier | 20%                  | 30%              | 40%              | 50%              | 60%              | 70%              | 80%              |
| 'RF'       | '68.58% ± 4.98%'     | '67% ± 4.85%'    | '67.5% ± 5.11%'  | '67% ± 5.07%'    | '69.5% ± 5.02%'  | '66.17% ± 5.2%'  | '67.58% ± 5.14%' |
| 'PLS-DA'   | '98.75% ± 1.07%'     | '98.25% ± 1.26%' | '96.92% ± 1.92%' | '98.25% ± 1.26%' | '99% ± 0.97%'    | '99.25% ± 0.84%' | '97.67% ± 1.47%' |
| 'SVM'      | '75.42% ± 4.35%'     | '77.58% ± 4.04%' | '76.83% ± 4.34%' | '77.17% ± 4.45%' | '79.08% ± 4.28%' | '78.33% ± 4.49%' | '78% ± 4.57%'    |
| 'RLR'      | '77.42% ± 4.66%'     | '76.92% ± 5.09%' | '72.58% ± 5.09%' | '73.92% ± 4.56%' | '67.5% ± 4.39%'  | '67.75% ± 4.52%' | '66.08% ± 4.74%' |
| 'kNN'      | '88.17% ± 3.47%'     | '85.5% ± 3.92%'  | '82.25% ± 4.12%' | '80% ± 3.96%'    | '80% ± 4.29%'    | '78.08% ± 4.7%'  | '75% ± 4.66%'    |

| Precision  | mean precision ± 95% CI |     |     |     |     |     |     |
|------------|-------------------------|-----|-----|-----|-----|-----|-----|
| Classifier | 20%                     | 30% | 40% | 50% | 60% | 70% | 80% |

|          |                     |                     |                     |                     |                     |                     |                     |
|----------|---------------------|---------------------|---------------------|---------------------|---------------------|---------------------|---------------------|
| 'RF'     | '84.75% ±<br>4.23%' | '87.65% ±<br>3.88%' | '86.6% ±<br>4.32%'  | '87.74% ±<br>4.27%' | '89.16% ±<br>4.3%'  | '90.65% ±<br>3.54%' | '89.18% ±<br>4.04%' |
| 'PLS-DA' | '69.11% ± 3.4%'     | '69.67% ±<br>3.52%' | '68.99% ±<br>3.7%'  | '68.94% ±<br>3.39%' | '69.53% ±<br>3.39%' | '68.19% ±<br>3.48%' | '69.13% ±<br>3.57%' |
| 'SVM'    | '89.19% ±<br>3.02%' | '90.33% ±<br>3%'    | '89.19% ±<br>3.1%'  | '87.37% ±<br>3.61%' | '87.5% ±<br>3.66%'  | '90.94% ±<br>3.27%' | '91.62% ±<br>3.19%' |
| 'RLR'    | '84.94% ± 3.4%'     | '84.86% ±<br>3.3%'  | '84.19% ±<br>3.59%' | '83.52% ±<br>3.68%' | '79.77% ±<br>4.09%' | '79.92% ±<br>3.67%' | '80.07% ±<br>3.89%' |
| 'kNN'    | '82.35% ±<br>3.24%' | '81.46% ±<br>3.21%' | '78.82% ±<br>3.64%' | '78.63% ±<br>3.38%' | '76.66% ±<br>3.8%'  | '77.82% ±<br>3.89%' | '77.48% ±<br>3.61%' |

| Specificity | mean specificity<br>± 95% CI |                     |                     |                     |                     |                     |                     |
|-------------|------------------------------|---------------------|---------------------|---------------------|---------------------|---------------------|---------------------|
| Classifier  | 20%                          | 30%                 | 40%                 | 50%                 | 60%                 | 70%                 | 80%                 |
| 'RF'        | '94.93% ±<br>1.35%'          | '95.57% ±<br>1.54%' | '95.47% ±<br>1.43%' | '96.2% ±<br>1.21%'  | '96.63% ±<br>1.25%' | '96.96% ±<br>1.11%' | '96.66% ±<br>1.2%'  |
| 'PLS-DA'    | '80.87% ±<br>2.47%'          | '81% ±<br>2.69%'    | '80.19% ±<br>2.73%' | '80.43% ±<br>2.66%' | '81.21% ±<br>2.56%' | '79.46% ±<br>2.87%' | '80.33% ±<br>2.78%' |
| 'SVM'       | '95.99% ±<br>1.14%'          | '96.51% ±<br>1.07%' | '95.98% ±<br>1.19%' | '95.59% ±<br>1.23%' | '95.56% ±<br>1.23%' | '96.84% ±<br>1.05%' | '97.29% ±<br>0.9%'  |
| 'RLR'       | '93.78% ±<br>1.56%'          | '93.68% ±<br>1.47%' | '93.63% ±<br>1.54%' | '93.47% ±<br>1.52%' | '92.69% ±<br>1.48%' | '92.83% ±<br>1.38%' | '92.72% ±<br>1.52%' |
| 'kNN'       | '92.14% ±<br>1.49%'          | '91.78% ±<br>1.54%' | '90.86% ±<br>1.69%' | '90.9% ±<br>1.58%'  | '89.76% ±<br>1.82%' | '90.52% ±<br>1.77%' | '91.18% ±<br>1.56%' |

| NPV        | mean NPV ±<br>95% CI |                     |                     |                     |                     |                     |                     |
|------------|----------------------|---------------------|---------------------|---------------------|---------------------|---------------------|---------------------|
| Classifier | 20%                  | 30%                 | 40%                 | 50%                 | 60%                 | 70%                 | 80%                 |
| 'RF'       | '89.5% ± 1.62%'      | '89.01% ±<br>1.61%' | '89.16% ±<br>1.68%' | '89.03% ±<br>1.65%' | '89.92% ±<br>1.68%' | '89.02% ±<br>1.64%' | '89.29% ±<br>1.68%' |
| 'PLS-DA'   | '99.5% ± 0.43%'      | '99.3% ±<br>0.5%'   | '98.85% ±<br>0.71%' | '99.3% ±<br>0.5%'   | '99.6% ±<br>0.39%'  | '99.7% ±<br>0.34%'  | '99.11% ±<br>0.56%' |
| 'SVM'      | '91.62% ±<br>1.44%'  | '92.34% ±<br>1.38%' | '92.22% ±<br>1.44%' | '92.22% ±<br>1.49%' | '92.92% ±<br>1.45%' | '92.79% ±<br>1.47%' | '92.74% ±<br>1.48%' |
| 'RLR'      | '92.28% ±<br>1.55%'  | '92.18% ±<br>1.61%' | '90.82% ±<br>1.64%' | '91.04% ±<br>1.53%' | '88.91% ±<br>1.48%' | '89.01% ±<br>1.52%' | '88.44% ±<br>1.59%' |
| 'kNN'      | '95.7% ± 1.27%'      | '94.91% ±<br>1.29%' | '93.64% ±<br>1.38%' | '92.77% ±<br>1.4%'  | '92.62% ±<br>1.59%' | '92.18% ±<br>1.65%' | '91.21% ±<br>1.61%' |

| F1         | mean F1 ± 95%<br>CI         |                     |                     |                     |                     |                     |                     |
|------------|-----------------------------|---------------------|---------------------|---------------------|---------------------|---------------------|---------------------|
| Classifier | 20%                         | 30%                 | 40%                 | 50%                 | 60%                 | 70%                 | 80%                 |
| 'RF'       | '75.33% ± 3.6%'             | '75.11% ±<br>3.45%' | '75.09% ±<br>3.8%'  | '76.83% ±<br>3.18%' | '78.77% ±<br>3.28%' | '75.84% ±<br>3.61%' | '76.11% ±<br>3.68%' |
| 'PLS-DA'   | '79.82% ±<br>2.16%'         | '79.83% ±<br>2.23%' | '78.35% ±<br>2.26%' | '79.39% ±<br>2.15%' | '80.26% ±<br>2.21%' | '79.37% ±<br>2.35%' | '79.07% ±<br>2.18%' |
| 'SVM'      | '80.17% ±<br>3.24%'         | '81.88% ±<br>3.17%' | '81.26% ±<br>3.14%' | '81.63% ±<br>3.05%' | '82.47% ±<br>3.17%' | '83.74% ±<br>2.91%' | '83.83% ±<br>3.01%' |
| 'RLR'      | '79.58% ±<br>78.53% ± 3.1%' | '76.17% ±<br>2.76%' | '75.41% ±<br>3.32%' | '71.13% ±<br>3.5%'  | '70.38% ±<br>3.23%' | '69.6% ±<br>3.41%'  | '69.6% ±<br>3.48%'  |
| 'kNN'      | '84.08% ±<br>2.84%'         | '82.34% ±<br>2.77%' | '79.49% ±<br>3.23%' | '77.58% ±<br>3.06%' | '77.16% ±<br>3.16%' | '77.65% ±<br>3.1%'  | '75.32% ±<br>3.3%'  |

## Rsp100\_Biomarkers\_CLL\_SUB\_111

| mRMR        |                               |                      |                      |                      |                      |
|-------------|-------------------------------|----------------------|----------------------|----------------------|----------------------|
| Accuracy    | mean accuracy $\pm$ 95% CI    |                      |                      |                      |                      |
| Classifier  | 5                             | 10                   | 20                   | 40                   | 50                   |
| 'RF'        | '69.18% $\pm$ 1.97%'          | '72% $\pm$ 1.97%'    | '72.41% $\pm$ 2.18%' | '72.24% $\pm$ 2.05%' | '74.88% $\pm$ 2.06%' |
| 'PLS-DA'    | '62.12% $\pm$ 2.19%'          | '64.71% $\pm$ 2.21%' | '68.29% $\pm$ 2.04%' | '69.59% $\pm$ 2.25%' | '71.82% $\pm$ 1.98%' |
| 'SVM'       | '68.82% $\pm$ 2.07%'          | '68.94% $\pm$ 2.29%' | '67.88% $\pm$ 2.27%' | '70.76% $\pm$ 2.2%'  | '72.35% $\pm$ 1.95%' |
| 'RLR'       | '68.94% $\pm$ 2.21%'          | '68.76% $\pm$ 2.16%' | '68.94% $\pm$ 2.3%'  | '70.76% $\pm$ 2.23%' | '71.53% $\pm$ 2.12%' |
| 'kNN'       | '67.47% $\pm$ 2.16%'          | '67.76% $\pm$ 2.18%' | '67% $\pm$ 2%'       | '66.88% $\pm$ 2.3%'  | '66% $\pm$ 2%'       |
| Recall      | mean recall $\pm$ 95% CI      |                      |                      |                      |                      |
| Classifier  | 5                             | 10                   | 20                   | 40                   | 50                   |
| 'RF'        | '75.55% $\pm$ 1.81%'          | '79.07% $\pm$ 1.49%' | '79.42% $\pm$ 1.63%' | '79.28% $\pm$ 1.54%' | '81.26% $\pm$ 1.56%' |
| 'PLS-DA'    | '71.7% $\pm$ 1.64%'           | '73.7% $\pm$ 1.63%'  | '76.39% $\pm$ 1.51%' | '77.35% $\pm$ 1.66%' | '79.05% $\pm$ 1.47%' |
| 'SVM'       | '75.55% $\pm$ 1.8%'           | '76.39% $\pm$ 1.89%' | '76.18% $\pm$ 1.65%' | '78.14% $\pm$ 1.66%' | '79.35% $\pm$ 1.44%' |
| 'RLR'       | '75.74% $\pm$ 2.02%'          | '75.48% $\pm$ 1.94%' | '76.18% $\pm$ 1.84%' | '77.2% $\pm$ 1.97%'  | '77.17% $\pm$ 1.98%' |
| 'kNN'       | '73.95% $\pm$ 2.06%'          | '76.07% $\pm$ 1.59%' | '75.29% $\pm$ 1.51%' | '75.31% $\pm$ 1.69%' | '74.75% $\pm$ 1.44%' |
| Precision   | mean precision $\pm$ 95% CI   |                      |                      |                      |                      |
| Classifier  | 5                             | 10                   | 20                   | 40                   | 50                   |
| 'RF'        | '76.87% $\pm$ 1.71%'          | '79.83% $\pm$ 1.51%' | '80.11% $\pm$ 1.63%' | '80.14% $\pm$ 1.57%' | '82.18% $\pm$ 1.56%' |
| 'PLS-DA'    | '62.73% $\pm$ 2.21%'          | '66.6% $\pm$ 2.24%'  | '73.7% $\pm$ 1.91%'  | '75.98% $\pm$ 2.07%' | '76.95% $\pm$ 1.87%' |
| 'SVM'       | '77% $\pm$ 1.92%'             | '77.68% $\pm$ 1.9%'  | '77.13% $\pm$ 1.77%' | '79.27% $\pm$ 1.72%' | '80.45% $\pm$ 1.5%'  |
| 'RLR'       | '75.47% $\pm$ 2.19%'          | '76.79% $\pm$ 1.78%' | '77.84% $\pm$ 1.78%' | '79.41% $\pm$ 1.69%' | '79.51% $\pm$ 1.7%'  |
| 'kNN'       | '75.58% $\pm$ 2%'             | '76.92% $\pm$ 1.74%' | '76.38% $\pm$ 1.6%'  | '76.62% $\pm$ 1.94%' | '75.99% $\pm$ 1.68%' |
| Specificity | mean specificity $\pm$ 95% CI |                      |                      |                      |                      |
| Classifier  | 5                             | 10                   | 20                   | 40                   | 50                   |
| 'RF'        | '81.46% $\pm$ 1.21%'          | '83.05% $\pm$ 1.21%' | '83.3% $\pm$ 1.35%'  | '83.2% $\pm$ 1.26%'  | '84.81% $\pm$ 1.26%' |
| 'PLS-DA'    | '80.2% $\pm$ 1.23%'           | '80.72% $\pm$ 1.27%' | '81.45% $\pm$ 1.27%' | '81.97% $\pm$ 1.37%' | '83.44% $\pm$ 1.2%'  |
| 'SVM'       | '81.21% $\pm$ 1.25%'          | '81.18% $\pm$ 1.4%'  | '80.53% $\pm$ 1.4%'  | '82.26% $\pm$ 1.34%' | '83.23% $\pm$ 1.2%'  |
| 'RLR'       | '81.46% $\pm$ 1.31%'          | '81.18% $\pm$ 1.32%' | '81.18% $\pm$ 1.42%' | '82.31% $\pm$ 1.35%' | '82.71% $\pm$ 1.31%' |
| 'kNN'       | '80.37% $\pm$ 1.32%'          | '80.49% $\pm$ 1.34%' | '79.95% $\pm$ 1.24%' | '79.84% $\pm$ 1.43%' | '79.37% $\pm$ 1.25%' |
| NPV         | mean NPV $\pm$ 95% CI         |                      |                      |                      |                      |
| Classifier  | 5                             | 10                   | 20                   | 40                   | 50                   |
| 'RF'        | '82.11% $\pm$ 1.21%'          | '83.7% $\pm$ 1.21%'  | '83.82% $\pm$ 1.35%' | '83.8% $\pm$ 1.26%'  | '85.47% $\pm$ 1.26%' |
| 'PLS-DA'    | '80.16% $\pm$ 1.23%'          | '80.83% $\pm$ 1.27%' | '81.92% $\pm$ 1.27%' | '82.63% $\pm$ 1.37%' | '83.81% $\pm$ 1.2%'  |
| 'SVM'       | '82.23% $\pm$ 1.25%'          | '82.01% $\pm$ 1.4%'  | '81.42% $\pm$ 1.4%'  | '83.11% $\pm$ 1.34%' | '84.06% $\pm$ 1.2%'  |
| 'RLR'       | '82.12% $\pm$ 1.31%'          | '81.94% $\pm$ 1.32%' | '81.92% $\pm$ 1.42%' | '83.11% $\pm$ 1.35%' | '83.39% $\pm$ 1.31%' |
| 'kNN'       | '81.37% $\pm$ 1.32%'          | '81.52% $\pm$ 1.34%' | '80.99% $\pm$ 1.24%' | '81.2% $\pm$ 1.43%'  | '80.63% $\pm$ 1.25%' |
| F1          | mean F1 $\pm$ 95% CI          |                      |                      |                      |                      |
| Classifier  | 5                             | 10                   | 20                   | 40                   | 50                   |

|          |                  |                  |                  |                  |                  |
|----------|------------------|------------------|------------------|------------------|------------------|
| 'RF'     | '75.48% ± 1.67%' | '78.61% ± 1.55%' | '79.1% ± 1.64%'  | '78.97% ± 1.55%' | '80.94% ± 1.58%' |
| 'PLS-DA' | '62.31% ± 2.08%' | '66.42% ± 2.15%' | '73.34% ± 1.74%' | '75.45% ± 1.93%' | '76.69% ± 1.77%' |
| 'SVM'    | '74.96% ± 1.81%' | '75.95% ± 1.86%' | '75.5% ± 1.71%'  | '77.7% ± 1.69%'  | '78.9% ± 1.5%'   |
| 'RLR'    | '74.77% ± 2.02%' | '75.34% ± 1.7%'  | '75.95% ± 1.78%' | '77.1% ± 1.88%'  | '77.43% ± 1.79%' |
| 'kNN'    | '73.69% ± 1.86%' | '75.18% ± 1.68%' | '74.51% ± 1.59%' | '74.25% ± 1.81%' | '73.71% ± 1.56%' |

#### Relief-F

Accuracy mean accuracy ± 95% CI

| Classifier | 5                | 10               | 20               | 40               | 50               |
|------------|------------------|------------------|------------------|------------------|------------------|
| 'RF'       | '66.35% ± 2.13%' | '68% ± 1.83%'    | '71.18% ± 1.78%' | '74.53% ± 1.83%' | '77% ± 1.55%'    |
| 'PLS-DA'   | '63.94% ± 2.16%' | '68% ± 2.02%'    | '71.29% ± 1.97%' | '74.71% ± 1.92%' | '75.06% ± 1.89%' |
| 'SVM'      | '67.12% ± 2.11%' | '70% ± 1.93%'    | '72.41% ± 1.89%' | '75.53% ± 1.86%' | '76.41% ± 1.79%' |
| 'RLR'      | '67.06% ± 1.97%' | '69.76% ± 1.85%' | '72.59% ± 1.85%' | '76.53% ± 1.82%' | '76.71% ± 1.69%' |
| 'kNN'      | '65.35% ± 2.19%' | '65.82% ± 1.91%' | '69.06% ± 2.02%' | '73.35% ± 2.11%' | '73.71% ± 2.02%' |

#### Recall

mean recall ± 95% CI

| Classifier | 5                | 10               | 20               | 40               | 50               |
|------------|------------------|------------------|------------------|------------------|------------------|
| 'RF'       | '74.15% ± 1.74%' | '75.96% ± 1.44%' | '78.32% ± 1.38%' | '80.88% ± 1.48%' | '82.64% ± 1.32%' |
| 'PLS-DA'   | '72.94% ± 1.66%' | '76.28% ± 1.48%' | '78.71% ± 1.46%' | '81.1% ± 1.5%'   | '81.52% ± 1.37%' |
| 'SVM'      | '74.05% ± 1.99%' | '77.29% ± 1.51%' | '79.4% ± 1.45%'  | '81.59% ± 1.51%' | '82.27% ± 1.46%' |
| 'RLR'      | '75.03% ± 1.62%' | '76.52% ± 1.55%' | '78.59% ± 1.57%' | '81.86% ± 1.61%' | '81.98% ± 1.51%' |
| 'kNN'      | '73.92% ± 1.67%' | '74.33% ± 1.53%' | '77.01% ± 1.5%'  | '80.05% ± 1.64%' | '80.23% ± 1.65%' |

#### Precision

mean precision ± 95% CI

| Classifier | 5                | 10               | 20               | 40               | 50               |
|------------|------------------|------------------|------------------|------------------|------------------|
| 'RF'       | '74.2% ± 1.91%'  | '75.9% ± 1.62%'  | '78.45% ± 1.52%' | '80.61% ± 1.67%' | '82.68% ± 1.36%' |
| 'PLS-DA'   | '66.42% ± 2.45%' | '72.52% ± 2.27%' | '75.58% ± 2.11%' | '78.22% ± 2.03%' | '78.77% ± 1.95%' |
| 'SVM'      | '75.31% ± 1.85%' | '78.49% ± 1.65%' | '80.28% ± 1.55%' | '82.49% ± 1.47%' | '83.55% ± 1.41%' |
| 'RLR'      | '74.41% ± 1.88%' | '78.02% ± 1.62%' | '80.6% ± 1.54%'  | '83.58% ± 1.38%' | '83.7% ± 1.28%'  |
| 'kNN'      | '74.15% ± 1.92%' | '75.3% ± 1.68%'  | '77.34% ± 1.71%' | '81.48% ± 1.69%' | '81.65% ± 1.67%' |

#### Specificity

mean specificity ± 95% CI

| Classifier | 5                | 10               | 20               | 40               | 50               |
|------------|------------------|------------------|------------------|------------------|------------------|
| 'RF'       | '79.84% ± 1.27%' | '80.77% ± 1.11%' | '82.7% ± 1.09%'  | '84.78% ± 1.1%'  | '86.24% ± 0.94%' |
| 'PLS-DA'   | '79.91% ± 1.25%' | '81.44% ± 1.19%' | '83.3% ± 1.13%'  | '85.3% ± 1.12%'  | '85.47% ± 1.14%' |
| 'SVM'      | '80.33% ± 1.27%' | '81.91% ± 1.18%' | '83.35% ± 1.14%' | '85.19% ± 1.14%' | '85.71% ± 1.11%' |
| 'RLR'      | '80.32% ± 1.2%'  | '81.82% ± 1.12%' | '83.49% ± 1.12%' | '85.82% ± 1.1%'  | '85.91% ± 1.04%' |
| 'kNN'      | '79.2% ± 1.33%'  | '79.39% ± 1.15%' | '81.35% ± 1.22%' | '83.87% ± 1.29%' | '84.09% ± 1.23%' |

#### NPV

mean NPV ± 95% CI

| Classifier | 5                | 10               | 20               | 40               | 50               |
|------------|------------------|------------------|------------------|------------------|------------------|
| 'RF'       | '80.32% ± 1.27%' | '81.25% ± 1.11%' | '83.35% ± 1.09%' | '85.34% ± 1.1%'  | '86.82% ± 0.94%' |
| 'PLS-DA'   | '80.04% ± 1.25%' | '81.89% ± 1.19%' | '83.65% ± 1.13%' | '85.64% ± 1.12%' | '85.89% ± 1.14%' |
| 'SVM'      | '81.29% ± 1.27%' | '82.82% ± 1.18%' | '84.1% ± 1.14%'  | '85.83% ± 1.14%' | '86.55% ± 1.11%' |
| 'RLR'      | '80.77% ± 1.2%'  | '82.6% ± 1.12%'  | '84.41% ± 1.12%' | '86.54% ± 1.1%'  | '86.67% ± 1.04%' |

|       |                  |                  |                  |                 |                 |
|-------|------------------|------------------|------------------|-----------------|-----------------|
| 'kNN' | '79.95% ± 1.33%' | '80.39% ± 1.15%' | '82.09% ± 1.22%' | '84.9% ± 1.29%' | '85.1% ± 1.23%' |
|-------|------------------|------------------|------------------|-----------------|-----------------|

| F1         | mean F1 ± 95% CI |                  |                  |                  |                  |
|------------|------------------|------------------|------------------|------------------|------------------|
| Classifier | 5                | 10               | 20               | 40               | 50               |
| 'RF'       | '73.35% ± 1.86%' | '75.3% ± 1.52%'  | 77.36% ± 1.43%'  | '79.99% ± 1.54%' | '81.93% ± 1.28%' |
| 'PLS-DA'   | '67.35% ± 2.17%' | '72.53% ± 2%'    | '75.64% ± 1.87%' | '78.21% ± 1.86%' | '78.67% ± 1.73%' |
| 'SVM'      | '73.7% ± 1.84%'  | '76.79% ± 1.52%' | '78.91% ± 1.5%'  | '81.45% ± 1.42%' | '82.13% ± 1.35%' |
| 'RLR'      | '73.84% ± 1.72%' | '76.05% ± 1.58%' | '78.3% ± 1.54%'  | '81.79% ± 1.53%' | '81.9% ± 1.43%'  |
| 'kNN'      | '72.93% ± 1.76%' | '73.6% ± 1.52%'  | '76.2% ± 1.59%'  | '79.63% ± 1.64%' | '79.94% ± 1.57%' |

### Chi-Squared

| Accuracy   | mean accuracy ± 95% CI |                  |                  |                  |                  |
|------------|------------------------|------------------|------------------|------------------|------------------|
| Classifier | 5                      | 10               | 20               | 40               | 50               |
| 'RF'       | '65.59% ± 2.08%'       | '67.94% ± 2.06%' | '70.53% ± 2.16%' | '73.65% ± 2.18%' | '74.06% ± 2.27%' |
| 'PLS-DA'   | '60.71% ± 2.23%'       | '63.94% ± 2.15%' | '64.88% ± 2.35%' | '68.41% ± 2.18%' | '67.41% ± 2.06%' |
| 'SVM'      | '64.94% ± 2.22%'       | '66.76% ± 2.06%' | '67.47% ± 2.06%' | '70.53% ± 2.23%' | '71.59% ± 2%'    |
| 'RLR'      | '63.35% ± 2.26%'       | '64.65% ± 2.11%' | '65.82% ± 2.2%'  | '68.76% ± 2.04%' | '69.76% ± 2.12%' |
| 'kNN'      | '64.76% ± 2.04%'       | '64.18% ± 2.19%' | '67% ± 1.99%'    | '67.65% ± 2.22%' | '67.59% ± 2.01%' |

| Recall     | mean recall ± 95% CI |                  |                  |                  |                  |
|------------|----------------------|------------------|------------------|------------------|------------------|
| Classifier | 5                    | 10               | 20               | 40               | 50               |
| 'RF'       | '74.13% ± 1.7%'      | '75.93% ± 1.65%' | '77.88% ± 1.69%' | '80.2% ± 1.7%'   | '80.54% ± 1.8%'  |
| 'PLS-DA'   | '70.83% ± 1.64%'     | '73.2% ± 1.58%'  | '73.83% ± 1.77%' | '76.45% ± 1.63%' | '75.77% ± 1.53%' |
| 'SVM'      | '72.51% ± 2%'        | '74.46% ± 1.87%' | '75.35% ± 1.78%' | '77.6% ± 1.79%'  | '78.64% ± 1.62%' |
| 'RLR'      | '71.88% ± 1.94%'     | '72.99% ± 1.81%' | '74.25% ± 1.71%' | '76.44% ± 1.62%' | '77.36% ± 1.59%' |
| 'kNN'      | '72.76% ± 1.84%'     | '72.85% ± 1.91%' | '75.17% ± 1.66%' | '75.51% ± 1.8%'  | '75.13% ± 1.88%' |

| Precision  | mean precision ± 95% CI |                  |                  |                  |                  |
|------------|-------------------------|------------------|------------------|------------------|------------------|
| Classifier | 5                       | 10               | 20               | 40               | 50               |
| 'RF'       | '73.46% ± 1.79%'        | '75.55% ± 1.74%' | '78.29% ± 1.76%' | '80.55% ± 1.7%'  | '80.85% ± 1.85%' |
| 'PLS-DA'   | '64.18% ± 2.35%'        | '67.83% ± 2.25%' | '69.89% ± 2.24%' | '73.5% ± 2.14%'  | '71.65% ± 2.09%' |
| 'SVM'      | '75.65% ± 2.08%'        | '76.9% ± 1.8%'   | '76.75% ± 1.77%' | '78.81% ± 1.73%' | '79.69% ± 1.59%' |
| 'RLR'      | '72.48% ± 1.98%'        | '73.32% ± 1.79%' | '74.92% ± 1.9%'  | '77.25% ± 1.65%' | '78.2% ± 1.59%'  |
| 'kNN'      | '74.19% ± 1.85%'        | '73.19% ± 2.04%' | '77.11% ± 1.74%' | '77.4% ± 1.85%'  | '77.02% ± 1.83%' |

| Specificity | mean specificity ± 95% CI |                  |                  |                  |                  |
|-------------|---------------------------|------------------|------------------|------------------|------------------|
| Classifier  | 5                         | 10               | 20               | 40               | 50               |
| 'RF'        | '79.31% ± 1.28%'          | '80.74% ± 1.28%' | '82.21% ± 1.34%' | '84.07% ± 1.36%' | '84.32% ± 1.4%'  |
| 'PLS-DA'    | '78.15% ± 1.28%'          | '79.24% ± 1.27%' | '79.5% ± 1.41%'  | '81.43% ± 1.31%' | '80.98% ± 1.25%' |
| 'SVM'       | '78.81% ± 1.34%'          | '79.88% ± 1.27%' | '80.36% ± 1.27%' | '82.1% ± 1.38%'  | '82.77% ± 1.24%' |
| 'RLR'       | '77.94% ± 1.37%'          | '78.73% ± 1.3%'  | '79.37% ± 1.35%' | '81.1% ± 1.29%'  | '81.68% ± 1.33%' |
| 'kNN'       | '78.74% ± 1.24%'          | '78.37% ± 1.34%' | '80.06% ± 1.24%' | '80.38% ± 1.4%'  | '80.32% ± 1.27%' |

| NPV        |   | mean NPV ± 95% CI |    |    |    |  |
|------------|---|-------------------|----|----|----|--|
| Classifier | 5 | 10                | 20 | 40 | 50 |  |

|          |                  |                  |                  |                  |                  |
|----------|------------------|------------------|------------------|------------------|------------------|
| 'RF'     | '79.78% ± 1.28%' | '81.36% ± 1.28%' | '82.91% ± 1.34%' | '84.67% ± 1.36%' | '84.8% ± 1.4%'   |
| 'PLS-DA' | '78.52% ± 1.28%' | '79.71% ± 1.27%' | '79.83% ± 1.41%' | '81.85% ± 1.31%' | '81.26% ± 1.25%' |
| 'SVM'    | '80.99% ± 1.34%' | '81.47% ± 1.27%' | '81.5% ± 1.27%'  | '82.83% ± 1.38%' | '83.54% ± 1.24%' |
| 'RLR'    | '78.75% ± 1.37%' | '79.33% ± 1.3%'  | '80.09% ± 1.35%' | '81.9% ± 1.29%'  | '82.5% ± 1.33%'  |
| 'kNN'    | '79.92% ± 1.24%' | '79.46% ± 1.34%' | '81.57% ± 1.24%' | '81.87% ± 1.4%'  | '81.76% ± 1.27%' |

| F1         | mean F1 ± 95% CI |                  |                  |                  |                  |
|------------|------------------|------------------|------------------|------------------|------------------|
| Classifier | 5                | 10               | 20               | 40               | 50               |
| 'RF'       | '73.01% ± 1.69%' | '74.79% ± 1.62%' | '77.23% ± 1.65%' | '79.68% ± 1.66%' | '80.12% ± 1.76%' |
| 'PLS-DA'   | '64.37% ± 2.27%' | '68.21% ± 2.04%' | '70.23% ± 2.05%' | '73.57% ± 1.97%' | '72.17% ± 1.87%' |
| 'SVM'      | '72.59% ± 1.91%' | '73.68% ± 1.72%' | '74.72% ± 1.67%' | '77.6% ± 1.68%'  | '78.38% ± 1.53%' |
| 'RLR'      | '71.3% ± 1.9%'   | '72.49% ± 1.64%' | '73.74% ± 1.7%'  | '75.89% ± 1.56%' | '76.97% ± 1.6%'  |
| 'kNN'      | '71.92% ± 1.77%' | '71.55% ± 1.93%' | '74.24% ± 1.58%' | '74.79% ± 1.71%' | '74.88% ± 1.64%' |

| Variance   |                        |                  |                  |                  |                  |  |
|------------|------------------------|------------------|------------------|------------------|------------------|--|
| Accuracy   | mean accuracy ± 95% CI |                  |                  |                  |                  |  |
| Classifier | 5                      | 10               | 20               | 40               | 50               |  |
| 'RF'       | '50.47% ± 1.91%'       | '51.88% ± 2.35%' | '59.41% ± 1.8%'  | '61.82% ± 2.11%' | '60.65% ± 1.86%' |  |
|            | '36.88% ± 2.09%'       | '36.65% ± 1.92%' |                  |                  |                  |  |
| 'PLS-DA'   | '47.29% ± 1.76%'       | '48.12% ± 1.75%' | '49.47% ± 1.74%' | '50.12% ± 2.21%' | '49.35% ± 2.13%' |  |
|            | '44.29% ± 1.82%'       | '46.71% ± 1.74%' |                  |                  |                  |  |
| 'SVM'      | '53.98% ± 2.03%'       | '52.42% ± 1.87%' | '52.42% ± 1.93%' | '59.65% ± 2.19%' | '57.29% ± 1.94%' |  |
|            | '42.65% ± 2.03%'       | '46.53% ± 1.87%' |                  |                  |                  |  |
| 'RLR'      | '42.65% ± 2.03%'       | '46.53% ± 1.87%' | '59.82% ± 1.93%' | '45.06% ± 1.91%' | '48.35% ± 1.77%' |  |
| 'kNN'      | '2.03% ± 2.03%'        | '1.87% ± 1.87%'  | '1.93% ± 1.93%'  | '59.65% ± 2.19%' | '57.29% ± 1.94%' |  |

| Recall     | mean recall $\pm$ 95% CI |                      |                      |                      |                      |
|------------|--------------------------|----------------------|----------------------|----------------------|----------------------|
| Classifier | 5                        | 10                   | 20                   | 40                   | 50                   |
| 'RF'       | '58.83% $\pm$ 2.17%'     | '58.65% $\pm$ 2.56%' | '65.02% $\pm$ 2.1%'  | '67.09% $\pm$ 2.5%'  | '65.29% $\pm$ 2.38%' |
|            | '49.14% $\pm$ 2.41%'     | '48.71% $\pm$ 2.36%' |                      |                      |                      |
| 'PLS-DA'   | '52.74% $\pm$ 2.54%'     | '53.04% $\pm$ 2.55%' | '56.05% $\pm$ 2.26%' | '57.91% $\pm$ 2.43%' | '57.66% $\pm$ 2.34%' |
|            | '53.98% $\pm$ 2.21%'     | '52.42% $\pm$ 2.32%' |                      |                      |                      |
| 'SVM'      | '49.63% $\pm$ 2.32%'     | '52.6% $\pm$ 2.48%'  | '66.35% $\pm$ 2.3%'  | '68.43% $\pm$ 2.24%' | '64.71% $\pm$ 2.3%'  |
|            | '2.32% $\pm$ 2.32%'      |                      |                      |                      |                      |
| 'RLR'      | '49.63% $\pm$ 2.32%'     | '52.6% $\pm$ 2.48%'  | '66.35% $\pm$ 2.3%'  | '55.45% $\pm$ 2.21%' | '57.4% $\pm$ 2.07%'  |
| 'kNN'      | '2.32% $\pm$ 2.32%'      | '52.6% $\pm$ 2.48%'  | '66.35% $\pm$ 2.3%'  | '68.43% $\pm$ 2.24%' | '64.71% $\pm$ 2.3%'  |

| Precision  | mean precision ± 95% CI |                  |                  |                  |                  |
|------------|-------------------------|------------------|------------------|------------------|------------------|
| Classifier | 5                       | 10               | 20               | 40               | 50               |
| 'RF'       | '61.23% ± 2%'           | '63.14% ± 2.28%' | '69.16% ± 1.81%' | '71.84% ± 1.91%' | '70.34% ± 2.05%' |
|            | '38.98% ± 2.45%'        | '41.3% ± 2.66%'  | '54.47% ± 2.63%' |                  |                  |
| 'PLS-DA'   | '64.08% ± 2.68%'        | '65.83% ± 2.66%' | '63.9% ± 2.11%'  | '58.6% ± 2.65%'  | '57.42% ± 2.47%' |
|            | '58.78% ± 2.77%'        | '63.25% ± 2.59%' |                  |                  |                  |
| 'SVM'      | '54.59% ± 2.16%'        | '58.14% ± 2.09%' | '70.01% ± 1.97%' | '61.08% ± 2.26%' | '66.39% ± 2.22%' |
|            | '2.16% ± 2.16%'         | '2.09% ± 2.09%'  |                  |                  |                  |
| 'kNN'      | '69.66% ± 2.15%'        | '67.58% ± 1.89%' | '69.66% ± 2.15%' | '67.58% ± 1.89%' | '67.58% ± 1.89%' |
|            |                         |                  |                  |                  |                  |

| Specificity | mean specificity $\pm$ 95% CI |                      |                      |                      |                      |
|-------------|-------------------------------|----------------------|----------------------|----------------------|----------------------|
| Classifier  | 5                             | 10                   | 20                   | 40                   | 50                   |
| 'RF'        | '70.35% $\pm$ 1.13%'          | '71.16% $\pm$ 1.39%' | '75.52% $\pm$ 1.1%'  | '76.95% $\pm$ 1.29%' | '76.3% $\pm$ 1.13%'  |
| 'PLS-DA'    | '64.54% $\pm$ 1.23%'          | '63.96% $\pm$ 1.16%' | '69.74% $\pm$ 1.32%' | '70.37% $\pm$ 1.29%' | '70.01% $\pm$ 1.24%' |
| 'SVM'       | '68.09% $\pm$ 1.06%'          | '68.62% $\pm$ 1.06%' | '69.47% $\pm$ 1.07%' | '71.06% $\pm$ 1.26%' | '69.92% $\pm$ 1.21%' |
| 'RLR'       | '66.53% $\pm$ 1.13%'          | '67.87% $\pm$ 1.12%' | '66.94% $\pm$ 1.26%' | '66.83% $\pm$ 1.2%'  | '68.8% $\pm$ 1.12%'  |
| 'kNN'       | '65.43% $\pm$ 1.27%'          | '67.71% $\pm$ 1.15%' | '75.82% $\pm$ 1.2%'  | '75.68% $\pm$ 1.33%' | '74.13% $\pm$ 1.19%' |

| NPV        | mean NPV ± 95% CI |                  |                  |                  |                  |
|------------|-------------------|------------------|------------------|------------------|------------------|
| Classifier | 5                 | 10               | 20               | 40               | 50               |
| 'RF'       | '70.73% ± 1.13%'  | '71.43% ± 1.39%' | '76.09% ± 1.1%'  | '77.62% ± 1.29%' | '77.1% ± 1.13%'  |
|            | '65.09% ± 1.23%'  | '64.34% ± 1.16%' | '69.93% ± 1.32%' | '70.78% ± 1.29%' | '70.27% ± 1.24%' |
| 'PLS-DA'   | '76.33% ± 1.06%'  | '78.06% ± 1.06%' | '72.8% ± 1.07%'  | '72.06% ± 1.26%' | '71.31% ± 1.21%' |
|            | '70.83% ± 1.13%'  | '74.96% ± 1.12%' | '69.98% ± 1.26%' | '70.21% ± 1.2%'  | '75.97% ± 1.12%' |
| 'RLR'      | '65.34% ± 1.27%'  | '67.85% ± 1.15%' | '76.61% ± 1.2%'  | '76.3% ± 1.33%'  | '74.59% ± 1.19%' |
|            |                   |                  |                  |                  |                  |

| F1         | mean F1 $\pm$ 95% CI |                      |                      |                      |                      |
|------------|----------------------|----------------------|----------------------|----------------------|----------------------|
| Classifier | 5                    | 10                   | 20                   | 40                   | 50                   |
| 'RF'       | '58.8% $\pm$ 1.93%'  | '59.62% $\pm$ 2.23%' | '66.21% $\pm$ 1.73%' | '68.34% $\pm$ 2.03%' | '66.82% $\pm$ 1.9%'  |
| 'PLS-DA'   | '43.2% $\pm$ 2.17%'  | '44.3% $\pm$ 2.11%'  | '55.3% $\pm$ 2.16%'  | '57.23% $\pm$ 2.24%' | '56.39% $\pm$ 2.19%' |
| 'SVM'      | '67.32% $\pm$ 2.77%' | '68.8% $\pm$ 2.75%'  | '61.97% $\pm$ 2.13%' | '63.11% $\pm$ 1.99%' | '62.69% $\pm$ 1.89%' |
| 'RLR'      | '59.86% $\pm$ 2.42%' | '63.85% $\pm$ 2.59%' | '58.52% $\pm$ 2.59%' | '61.59% $\pm$ 2.63%' | '67.93% $\pm$ 2.74%' |
| 'kNN'      | '52.76% $\pm$ 1.9%'  | '55.23% $\pm$ 1.9%'  | '66.77% $\pm$ 1.89%' | '68.35% $\pm$ 1.96%' | '66.09% $\pm$ 1.81%' |

#### Genetic Algorithm: PopSize = 50, Max NumGen= 35

| Accuracy   | accuracy |          |          |          |          |
|------------|----------|----------|----------|----------|----------|
| Classifier | 5        | 10       | 20       | 40       | 50       |
| 'RF'       | '76.47%' | '70.59%' | '76.47%' | '82.35%' | '88.24%' |
| 'PLS-DA'   | '70.59%' | '76.47%' | '52.94%' | '64.71%' | '70.59%' |
| 'SVM'      | '70.59%' | '76.47%' | '58.82%' | '76.47%' | '76.47%' |
| 'RLR'      | '47.06%' | '70.59%' | '47.06%' | '64.71%' | '70.59%' |
| 'kNN'      | '47.06%' | '52.94%' | '35.29%' | '70.59%' | '52.94%' |

| Recall     | recall   |          |          |          |          |
|------------|----------|----------|----------|----------|----------|
| Classifier | 5        | 10       | 20       | 40       | 50       |
| 'RF'       | '83.33%' | '79.17%' | '83.33%' | '87.5%'  | '91.67%' |
| 'PLS-DA'   | '79.17%' | '83.33%' | '37.5%'  | '75%'    | '79.17%' |
| 'SVM'      | '79.17%' | '83.33%' | '70.83%' | '83.33%' | '83.33%' |

|       |         |         |         |          |          |
|-------|---------|---------|---------|----------|----------|
| 'RLR' | '62.5%' | '50%'   | '62.5%' | '45.83%' | '79.17%' |
| 'kNN' | '62.5%' | '37.5%' | '25%'   | '79.17%' | '37.5%'  |

| Precision  | precision |          |          |          |          |
|------------|-----------|----------|----------|----------|----------|
| Classifier | 5         | 10       | 20       | 40       | 50       |
| 'RF'       | '83.33%'  | '81.21%' | '83.33%' | '90.91%' | '91.67%' |
| 'PLS-DA'   | '71.21%'  | '84.44%' | '37.5%'  | '61.31%' | '79.37%' |
| 'SVM'      | '79.37%'  | '83.33%' | '71.52%' | '84.44%' | '84.44%' |
| 'RLR'      | '62.43%'  | '70.71%' | '62.43%' | '64.58%' | '79.37%' |
| 'kNN'      | '48.15%'  | '52.78%' | '35.42%' | '79.37%' | '55%'    |

| Specificity | specificity |          |          |          |          |
|-------------|-------------|----------|----------|----------|----------|
| Classifier  | 5           | 10       | 20       | 40       | 50       |
| 'RF'        | '85.19%'    | '81.48%' | '85.19%' | '88.89%' | '92.59%' |
| 'PLS-DA'    | '83.1%'     | '85.19%' | '71.99%' | '79.4%'  | '81.48%' |
| 'SVM'       | '81.48%'    | '85.19%' | '74.07%' | '85.19%' | '85.19%' |
| 'RLR'       | '66.67%'    | '81.48%' | '66.67%' | '77.78%' | '81.48%' |
| 'kNN'       | '68.29%'    | '70.37%' | '59.26%' | '81.48%' | '70.37%' |

| NPV        | NPV      |          |          |          |          |
|------------|----------|----------|----------|----------|----------|
| Classifier | 5        | 10       | 20       | 40       | 50       |
| 'RF'       | '85.19%' | '83.33%' | '85.19%' | '91.67%' | '92.59%' |
| 'PLS-DA'   | '84.19%' | '86.15%' | '71.99%' | '78.89%' | '81.67%' |
| 'SVM'      | '81.67%' | '85.19%' | '75%'    | '86.15%' | '86.15%' |
| 'RLR'      | '66.67%' | '83.28%' | '66.67%' | '78.59%' | '81.67%' |
| 'kNN'      | '68.18%' | '70.72%' | '58.69%' | '81.67%' | '70.82%' |

| F1         | F1       |          |          |          |          |
|------------|----------|----------|----------|----------|----------|
| Classifier | 5        | 10       | 20       | 40       | 50       |
| 'RF'       | '83.33%' | '78.41%' | '83.33%' | '87.04%' | '91.67%' |
| 'PLS-DA'   | '69.01%' | '83.07%' | '56.25%' | '65.28%' | '79.08%' |
| 'SVM'      | '79.08%' | '83.33%' | '69.77%' | '83.07%' | '83.07%' |
| 'RLR'      | '62.35%' | '72.22%' | '62.35%' | '66.54%' | '79.08%' |
| 'kNN'      | '52.19%' | '54.41%' | '36.4%'  | '79.08%' | '53.08%' |

| Number of Generations |    |    |    |    |    |
|-----------------------|----|----|----|----|----|
| Classifier            | 5  | 10 | 20 | 40 | 50 |
| 'RF'                  | 35 | 35 | 35 | 35 | 35 |
| 'PLS-DA'              | 35 | 35 | 35 | 35 | 35 |
| 'SVM'                 | 35 | 35 | 35 | 35 | 35 |
| 'RLR'                 | 35 | 35 | 35 | 35 | 35 |
| 'kNN'                 | 35 | 35 | 35 | 35 | 35 |

This means that in all cases the algorithm stopped after reaching the max number of generations



**Genetic Algorithm: PopSize = 200, Max Num Gen = 150**

| Accuracy   | accuracy |          |          |          |          |
|------------|----------|----------|----------|----------|----------|
| Classifier | 5        | 10       | 20       | 40       | 50       |
| 'RF'       | '64.71%' | '70.59%' | '82.35%' | '70.59%' | '94.12%' |
| 'PLS-DA'   | '64.71%' | '58.82%' | '70.59%' | '70.59%' | '64.71%' |
| 'SVM'      | '82.35%' | '76.47%' | '76.47%' | '82.35%' | '82.35%' |
| 'RLR'      | '52.94%' | '64.71%' | '41.18%' | '52.94%' | '70.59%' |
| 'kNN'      | '35.29%' | '35.29%' | '47.06%' | '58.82%' | '70.59%' |

| Recall     | recall   |          |          |          |          |
|------------|----------|----------|----------|----------|----------|
| Classifier | 5        | 10       | 20       | 40       | 50       |
| 'RF'       | '75%'    | '79.17%' | '87.5%'  | '79.17%' | '95.83%' |
| 'PLS-DA'   | '75%'    | '70.83%' | '79.17%' | '79.17%' | '75%'    |
| 'SVM'      | '87.5%'  | '54.17%' | '83.33%' | '87.5%'  | '87.5%'  |
| 'RLR'      | '66.67%' | '75%'    | '29.17%' | '66.67%' | '79.17%' |
| 'kNN'      | '54.17%' | '54.17%' | '33.33%' | '41.67%' | '79.17%' |

| Precision  | precision |          |          |          |          |
|------------|-----------|----------|----------|----------|----------|
| Classifier | 5         | 10       | 20       | 40       | 50       |
| 'RF'       | '75.56%'  | '79.37%' | '90.91%' | '81.21%' | '96.3%'  |
| 'PLS-DA'   | '69.44%'  | '56.11%' | '81.21%' | '67.78%' | '58.73%' |
| 'SVM'      | '73.61%'  | '77.86%' | '84.44%' | '90.91%' | '90.91%' |
| 'RLR'      | '66.67%'  | '75.56%' | '31.55%' | '66.67%' | '81.21%' |
| 'kNN'      | '38.89%'  | '53.97%' | '48.33%' | '58.57%' | '79.37%' |

| Specificity | specificity |          |          |          |          |
|-------------|-------------|----------|----------|----------|----------|
| Classifier  | 5           | 10       | 20       | 40       | 50       |
| 'RF'        | '77.78%'    | '81.48%' | '88.89%' | '81.48%' | '96.3%'  |
| 'PLS-DA'    | '79.4%'     | '77.31%' | '81.48%' | '84.72%' | '81.02%' |
| 'SVM'       | '92.13%'    | '85.19%' | '85.19%' | '88.89%' | '88.89%' |
| 'RLR'       | '70.37%'    | '77.78%' | '66.2%'  | '70.37%' | '81.48%' |
| 'kNN'       | '60.88%'    | '59.26%' | '66.67%' | '74.07%' | '81.48%' |

| NPV        | NPV      |          |          |          |          |
|------------|----------|----------|----------|----------|----------|
| Classifier | 5        | 10       | 20       | 40       | 50       |
| 'RF'       | '78.35%' | '81.67%' | '91.67%' | '83.33%' | '96.67%' |
| 'PLS-DA'   | '81.43%' | '77.66%' | '83.33%' | '84.98%' | '80%'    |
| 'SVM'      | '90.24%' | '86.61%' | '86.15%' | '91.67%' | '91.67%' |
| 'RLR'      | '73.33%' | '78.35%' | '65.93%' | '70.56%' | '83.33%' |
| 'kNN'      | '60.98%' | '59.17%' | '65.82%' | '75.18%' | '81.67%' |

| F1         | F1       |          |          |          |          |
|------------|----------|----------|----------|----------|----------|
| Classifier | 5        | 10       | 20       | 40       | 50       |
| 'RF'       | '74.6%'  | '79.08%' | '87.04%' | '78.41%' | '95.82%' |
| 'PLS-DA'   | '63.74%' | '55.56%' | '78.41%' | '64.81%' | '61.11%' |
| 'SVM'      | '74.4%'  | '78.89%' | '83.07%' | '87.04%' | '87.04%' |

|       |          |          |          |          |          |
|-------|----------|----------|----------|----------|----------|
| 'RLR' | '61.21%' | '74.6%'  | '45.42%' | '66.14%' | '78.41%' |
| 'kNN' | '43.51%' | '53.99%' | '40.43%' | '60%'    | '79.08%' |

Number of Generations

| Classifier | 5   | 10  | 20  | 40  | 50  |
|------------|-----|-----|-----|-----|-----|
| 'RF'       | 64  | 65  | 70  | 73  | 94  |
| 'PLS-DA'   | 62  | 60  | 87  | 82  | 83  |
| 'SVM'      | 64  | 63  | 75  | 69  | 74  |
| 'RLR'      | 150 | 150 | 139 | 150 | 115 |
| 'kNN'      | 51  | 51  | 51  | 51  | 51  |

## Rsp100\_FeaturesSets\_CLL\_SUB\_111

| mRMR        |                               |                      |                      |                      |                      |                      |                      |
|-------------|-------------------------------|----------------------|----------------------|----------------------|----------------------|----------------------|----------------------|
| Accuracy    | mean accuracy $\pm$ 95% CI    |                      |                      |                      |                      |                      |                      |
| Classifier  | 20%                           | 30%                  | 40%                  | 50%                  | 60%                  | 70%                  | 80%                  |
| 'RF'        | '79.41% $\pm$ 1.81%'          | '77.41% $\pm$ 1.83%' | '77.12% $\pm$ 2.09%' | '76.59% $\pm$ 1.95%' | '75.88% $\pm$ 2.05%' | '75.41% $\pm$ 2.07%' | '76.12% $\pm$ 1.98%' |
| 'PLS-DA'    | '81.88% $\pm$ 1.45%'          | '80.47% $\pm$ 1.5%'  | '80.88% $\pm$ 1.39%' | '79.94% $\pm$ 1.56%' | '79.59% $\pm$ 1.6%'  | '79.71% $\pm$ 1.63%' | '80.24% $\pm$ 1.42%' |
| 'SVM'       | '81.53% $\pm$ 1.74%'          | '80.29% $\pm$ 1.67%' | '81.24% $\pm$ 1.54%' | '80.12% $\pm$ 1.79%' | '78.65% $\pm$ 1.79%' | '79% $\pm$ 1.76%'    | '78.47% $\pm$ 1.73%' |
| 'RLR'       | '77.88% $\pm$ 1.85%'          | '77.71% $\pm$ 1.66%' | '77.47% $\pm$ 1.7%'  | '77.71% $\pm$ 1.68%' | '77.53% $\pm$ 1.7%'  | '78.76% $\pm$ 1.67%' | '77.18% $\pm$ 1.62%' |
| 'kNN'       | '64.65% $\pm$ 1.71%'          | '62.53% $\pm$ 2.06%' | '58.76% $\pm$ 2%'    | '58.35% $\pm$ 1.98%' | '58.06% $\pm$ 1.92%' | '58.24% $\pm$ 1.93%' | '58.82% $\pm$ 1.9%'  |
| Recall      | mean recall $\pm$ 95% CI      |                      |                      |                      |                      |                      |                      |
| Classifier  | 20%                           | 30%                  | 40%                  | 50%                  | 60%                  | 70%                  | 80%                  |
| 'RF'        | '84.82% $\pm$ 1.34%'          | '83.09% $\pm$ 1.5%'  | '82.74% $\pm$ 1.73%' | '81.94% $\pm$ 1.78%' | '81.86% $\pm$ 1.68%' | '81.36% $\pm$ 1.67%' | '81.86% $\pm$ 1.74%' |
| 'PLS-DA'    | '86.56% $\pm$ 1.08%'          | '85.54% $\pm$ 1.11%' | '85.86% $\pm$ 1.04%' | '85.19% $\pm$ 1.16%' | '84.95% $\pm$ 1.18%' | '85.02% $\pm$ 1.2%'  | '85.39% $\pm$ 1.05%' |
| 'SVM'       | '86.21% $\pm$ 1.39%'          | '85.17% $\pm$ 1.38%' | '85.78% $\pm$ 1.37%' | '84.95% $\pm$ 1.48%' | '83.76% $\pm$ 1.59%' | '84.01% $\pm$ 1.57%' | '83.59% $\pm$ 1.53%' |
| 'RLR'       | '81.55% $\pm$ 2.08%'          | '81.06% $\pm$ 1.94%' | '81.44% $\pm$ 1.8%'  | '81.35% $\pm$ 1.84%' | '81.02% $\pm$ 1.88%' | '82.88% $\pm$ 1.58%' | '80.67% $\pm$ 1.81%' |
| 'kNN'       | '71.98% $\pm$ 1.84%'          | '69.56% $\pm$ 2.14%' | '66.43% $\pm$ 2.12%' | '64.8% $\pm$ 2.29%'  | '65.26% $\pm$ 2.23%' | '65.39% $\pm$ 2.09%' | '65.48% $\pm$ 2.18%' |
| Precision   | mean precision $\pm$ 95% CI   |                      |                      |                      |                      |                      |                      |
| Classifier  | 20%                           | 30%                  | 40%                  | 50%                  | 60%                  | 70%                  | 80%                  |
| 'RF'        | '86.19% $\pm$ 1.35%'          | '84.5% $\pm$ 1.43%'  | '84.34% $\pm$ 1.6%'  | '83.82% $\pm$ 1.51%' | '83.51% $\pm$ 1.57%' | '83.13% $\pm$ 1.56%' | '83.56% $\pm$ 1.59%' |
| 'PLS-DA'    | '85.85% $\pm$ 1.41%'          | '85.18% $\pm$ 1.33%' | '84.52% $\pm$ 1.46%' | '83.89% $\pm$ 1.61%' | '84% $\pm$ 1.6%'     | '83.93% $\pm$ 1.55%' | '84.24% $\pm$ 1.42%' |
| 'SVM'       | '87.29% $\pm$ 1.27%'          | '86.44% $\pm$ 1.25%' | '87.23% $\pm$ 1.19%' | '86.48% $\pm$ 1.34%' | '85.4% $\pm$ 1.38%'  | '85.68% $\pm$ 1.36%' | '85.14% $\pm$ 1.35%' |
| 'RLR'       | '84.62% $\pm$ 1.56%'          | '84.45% $\pm$ 1.39%' | '84.46% $\pm$ 1.4%'  | '84.59% $\pm$ 1.38%' | '84.55% $\pm$ 1.42%' | '85.78% $\pm$ 1.27%' | '84.45% $\pm$ 1.3%'  |
| 'kNN'       | '77.35% $\pm$ 1.8%'           | '74.91% $\pm$ 2.11%' | '71.17% $\pm$ 2.25%' | '71.03% $\pm$ 2.25%' | '70.35% $\pm$ 2.14%' | '70.23% $\pm$ 2.27%' | '71.37% $\pm$ 1.86%' |
| Specificity | mean specificity $\pm$ 95% CI |                      |                      |                      |                      |                      |                      |
| Classifier  | 20%                           | 30%                  | 40%                  | 50%                  | 60%                  | 70%                  | 80%                  |
| 'RF'        | '87.55% $\pm$ 1.11%'          | '86.32% $\pm$ 1.13%' | '86.12% $\pm$ 1.3%'  | '85.84% $\pm$ 1.19%' | '85.4% $\pm$ 1.28%'  | '85.1% $\pm$ 1.27%'  | '85.51% $\pm$ 1.23%' |
| 'PLS-DA'    | '89.28% $\pm$ 0.87%'          | '88.38% $\pm$ 0.92%' | '88.82% $\pm$ 0.83%' | '88.27% $\pm$ 0.92%' | '87.97% $\pm$ 0.95%' | '88.05% $\pm$ 0.98%' | '88.36% $\pm$ 0.87%' |
| 'SVM'       | '88.81% $\pm$ 1.06%'          | '88.06% $\pm$ 1.01%' | '88.66% $\pm$ 0.94%' | '87.98% $\pm$ 1.08%' | '87.09% $\pm$ 1.08%' | '87.31% $\pm$ 1.06%' | '87% $\pm$ 1.04%'    |
| 'RLR'       | '86.56% $\pm$ 1.14%'          | '86.49% $\pm$ 1.02%' | '86.34% $\pm$ 1.04%' | '86.51% $\pm$ 1.03%' | '86.39% $\pm$ 1.06%' | '87.15% $\pm$ 1.03%' | '86.2% $\pm$ 1%'     |
| 'kNN'       | '78.55% $\pm$ 1.05%'          | '77.23% $\pm$ 1.28%' | '75% $\pm$ 1.23%'    | '74.72% $\pm$ 1.23%' | '74.6% $\pm$ 1.16%'  | '74.71% $\pm$ 1.18%' | '75.08% $\pm$ 1.14%' |

| NPV        |                      | mean NPV $\pm$ 95% CI |                     |                      |                      |                      |                      |
|------------|----------------------|-----------------------|---------------------|----------------------|----------------------|----------------------|----------------------|
| Classifier | 20%                  | 30%                   | 40%                 | 50%                  | 60%                  | 70%                  | 80%                  |
| 'RF'       | '88.54% $\pm$ 1.11%' | '87.26% $\pm$ 1.13%'  | '87.14% $\pm$ 1.3%' | '86.78% $\pm$ 1.19%' | '86.46% $\pm$ 1.28%' | '86.13% $\pm$ 1.27%' | '86.56% $\pm$ 1.23%' |
|            | '89.75% $\pm$        | '88.94% $\pm$         | '89.3% $\pm$        | '88.84% $\pm$        | '88.55% $\pm$        | '88.61% $\pm$        | '88.85% $\pm$        |
| 'PLS-DA'   | 0.87%'               | 0.92%'                | 0.83%'              | 0.92%'               | 0.95%'               | 0.98%'               | 0.87%'               |
|            | '89.5% $\pm$         | '88.87% $\pm$         | '89.5% $\pm$        | '88.89% $\pm$        | '88.07% $\pm$        | '88.3% $\pm$         | '87.92% $\pm$        |
| 'SVM'      | 1.06%'               | 1.01%'                | 0.94%'              | 1.08%'               | 1.08%'               | 1.06%'               | 1.04%'               |
|            | '87.52% $\pm$        | '87.41% $\pm$         | '87.33% $\pm$       | '87.53% $\pm$        | '87.52% $\pm$        | '88.27% $\pm$        | '87.38% $\pm$        |
| 'RLR'      | 1.14%'               | 1.02%'                | 1.04%'              | 1.03%'               | 1.06%'               | 1.03%'               | 1%'                  |
|            | '81.69% $\pm$        | '79.91% $\pm$         | '77.44% $\pm$       | '76.94% $\pm$        | '77.08% $\pm$        | '76.75% $\pm$        | '77.37% $\pm$        |
| 'kNN'      | 1.05%'               | 1.28%'                | 1.23%'              | 1.23%'               | 1.16%'               | 1.18%'               | 1.14%'               |

| F1         |                      | mean F1 $\pm$ 95% CI |                      |                      |                      |                      |                      |
|------------|----------------------|----------------------|----------------------|----------------------|----------------------|----------------------|----------------------|
| Classifier | 20%                  | 30%                  | 40%                  | 50%                  | 60%                  | 70%                  | 80%                  |
| 'RF'       | '84.42% $\pm$ 1.37%' | '82.9% $\pm$ 1.4%'   | '82.46% $\pm$ 1.64%' | '81.87% $\pm$ 1.62%' | '81.55% $\pm$ 1.59%' | '81.16% $\pm$ 1.59%' | '81.78% $\pm$ 1.54%' |
|            | '85.25% $\pm$        | '84.42% $\pm$        | '83.95% $\pm$        | '83.19% $\pm$        | '83.27% $\pm$        | '83.25% $\pm$        | '83.67% $\pm$        |
| 'PLS-DA'   | 1.29%'               | 1.23%'               | 1.31%'               | 1.46%'               | 1.43%'               | 1.41%'               | 1.25%'               |
|            | '85.98% $\pm$        | '85.08% $\pm$        | '85.71% $\pm$        | '84.86% $\pm$        | '83.76% $\pm$        | '84.02% $\pm$        | '83.64% $\pm$        |
| 'SVM'      | 1.39%'               | 1.28%'               | 1.22%'               | 1.39%'               | 1.41%'               | 1.39%'               | 1.36%'               |
|            | '82.23% $\pm$        | '81.86% $\pm$        | '81.9% $\pm$         | '81.99% $\pm$        | '81.88% $\pm$        | '83.08% $\pm$        | '81.4% $\pm$         |
| 'RLR'      | 1.65%'               | 1.49%'               | 1.47%'               | 1.45%'               | 1.41%'               | 1.42%'               | 1.43%'               |
|            | '70.76% $\pm$        | '69.07% $\pm$        | '66.13% $\pm$        | '65.42% $\pm$        | '65.73% $\pm$        | '66.03% $\pm$        | '65.31% $\pm$        |
| 'kNN'      | 1.62%'               | 1.86%'               | 1.91%'               | 1.87%'               | 1.9%'                | 1.62%'               | 1.79%'               |

| Relief-F   |                      | mean accuracy $\pm$ 95% CI |                      |                      |                      |                      |                      |
|------------|----------------------|----------------------------|----------------------|----------------------|----------------------|----------------------|----------------------|
| Classifier | 20%                  | 30%                        | 40%                  | 50%                  | 60%                  | 70%                  | 80%                  |
| 'RF'       | '78.41% $\pm$ 1.94%' | '78.06% $\pm$ 1.75%'       | '77.47% $\pm$ 1.85%' | '77.18% $\pm$ 1.77%' | '76.53% $\pm$ 1.82%' | '75.29% $\pm$ 1.84%' | '75.71% $\pm$ 2.02%' |
|            | '81.59% $\pm$        | '80.65% $\pm$              | '80.76% $\pm$        | '79.82% $\pm$        | '79.12% $\pm$        | '79.06% $\pm$        | '78.88% $\pm$        |
| 'PLS-DA'   | 1.64%'               | 1.75%'                     | 1.75%'               | 1.78%'               | 1.69%'               | 1.83%'               | 1.72%'               |
|            | '81.94% $\pm$        | '80.59% $\pm$              | '80.29% $\pm$        | '80.18% $\pm$        | '79.88% $\pm$        | '79.41% $\pm$        | '78.71% $\pm$        |
| 'SVM'      | 1.89%'               | 1.77%'                     | 1.88%'               | 1.82%'               | 1.77%'               | 1.78%'               | 1.74%'               |
|            | '76.35% $\pm$        | '76.53% $\pm$              | '77.53% $\pm$        | '78.12% $\pm$        | '78% $\pm$           | '77.82% $\pm$        | '77.65% $\pm$        |
| 'RLR'      | 1.73%'               | 1.75%'                     | 1.9%'                | 1.73%'               | 1.7%'                | 1.69%'               | 1.7%'                |
|            | '70.24% $\pm$        | '67% $\pm$                 | '66.47% $\pm$        | '64.06% $\pm$        | '63.53% $\pm$        | '62.47% $\pm$        | '62.18% $\pm$        |
| 'kNN'      | 2.1%'                | 2.13%'                     | 2.25%'               | 2.19%'               | 2.33%'               | 2.04%'               | 2.13%'               |

| Recall     |                      | mean recall $\pm$ 95% CI |                      |                      |                     |                      |                     |
|------------|----------------------|--------------------------|----------------------|----------------------|---------------------|----------------------|---------------------|
| Classifier | 20%                  | 30%                      | 40%                  | 50%                  | 60%                 | 70%                  | 80%                 |
| 'RF'       | '83.68% $\pm$ 1.64%' | '83.41% $\pm$ 1.48%'     | '83.05% $\pm$ 1.52%' | '82.67% $\pm$ 1.63%' | '82.17% $\pm$ 1.6%' | '81.26% $\pm$ 1.65%' | '81.2% $\pm$ 1.77%' |
|            | '86.39% $\pm$        | '85.7% $\pm$             | '85.76% $\pm$        | '85.08% $\pm$        | '84.52% $\pm$       | '84.51% $\pm$        | '84.4% $\pm$        |
| 'PLS-DA'   | 1.22%'               | 1.29%'                   | 1.3%'                | 1.33%'               | 1.27%'              | 1.37%'               | 1.28%'              |
|            | '86.41% $\pm$        | '85.27% $\pm$            | '85.08% $\pm$        | '84.96% $\pm$        | '84.66% $\pm$       | '84.3% $\pm$         | '83.78% $\pm$       |
| 'SVM'      | 1.56%'               | 1.51%'                   | 1.55%'               | 1.51%'               | 1.57%'              | 1.57%'               | 1.54%'              |
|            | '79.62% $\pm$        | '80.03% $\pm$            | '81.02% $\pm$        | '81.76% $\pm$        | '81.33% $\pm$       | '81.6% $\pm$         | '81.04% $\pm$       |
| 'RLR'      | 1.82%'               | 1.73%'                   | 1.84%'               | 1.71%'               | 1.87%'              | 1.77%'               | 1.96%'              |
|            | '76.95% $\pm$        | '73.79% $\pm$            | '72.73% $\pm$        | '71.15% $\pm$        | '69.57% $\pm$       | '69.96% $\pm$        | '69.91% $\pm$       |
| 'kNN'      | 1.9%'                | 2.11%'                   | 2.29%'               | 2.34%'               | 2.65%'              | 2.22%'               | 2.17%'              |

| Precision  |     | mean precision $\pm$ 95% CI |     |     |     |     |     |
|------------|-----|-----------------------------|-----|-----|-----|-----|-----|
| Classifier | 20% | 30%                         | 40% | 50% | 60% | 70% | 80% |

|          |                     |                     |                     |                     |                     |                     |                     |
|----------|---------------------|---------------------|---------------------|---------------------|---------------------|---------------------|---------------------|
|          | '85.29% ±<br>1.51%' | '85.12% ±<br>1.35%' | '84.48% ±<br>1.43%' | '84.48% ±<br>1.45%' | '84.12% ±<br>1.41%' | '83.07% ±<br>1.49%' | '83.3% ±<br>1.55%'  |
| 'RF'     | '84.62% ±<br>1.56%' | '83.17% ±<br>1.72%' | '83.85% ±<br>1.69%' | '83.55% ±<br>1.75%' | '83.16% ±<br>1.68%' | '83.11% ±<br>1.74%' | '83.19% ±<br>1.65%' |
| 'PLS-DA' | '87.44% ±<br>1.39%' | '86.41% ±<br>1.35%' | '86.28% ±<br>1.39%' | '86.37% ±<br>1.35%' | '86.2% ±<br>1.35%'  | '85.9% ±<br>1.36%'  | '85.38% ±<br>1.34%' |
| 'SVM'    | '83.93% ±<br>1.33%' | '83.91% ±<br>1.34%' | '84.72% ±<br>1.46%' | '85.33% ±<br>1.27%' | '85.14% ±<br>1.3%'  | '84.94% ±<br>1.3%'  | '84.77% ±<br>1.39%' |
| 'RLR'    | '79.98% ±<br>1.7%'  | '77.43% ±<br>1.78%' | '76.69% ±<br>2.06%' | '75.33% ±<br>1.99%' | '74.46% ±<br>2.12%' | '74.19% ±<br>1.92%' | '73.99% ±<br>1.89%' |
| 'kNN'    |                     |                     |                     |                     |                     |                     |                     |

| Specificity | mean specificity ± 95% CI |                     |                     |                     |                     |                     |                     |
|-------------|---------------------------|---------------------|---------------------|---------------------|---------------------|---------------------|---------------------|
| Classifier  | 20%                       | 30%                 | 40%                 | 50%                 | 60%                 | 70%                 | 80%                 |
|             | '86.91% ±<br>1.19%'       | '86.71% ±<br>1.07%' | '86.33% ±<br>1.14%' | '86.21% ±<br>1.08%' | '85.79% ±<br>1.13%' | '85.01% ±<br>1.14%' | '85.31% ±<br>1.24%' |
| 'RF'        | '89.28% ±<br>0.99%'       | '88.82% ±<br>1.05%' | '88.84% ±<br>1.03%' | '88.16% ±<br>1.05%' | '87.71% ±<br>1%'    | '87.74% ±<br>1.08%' | '87.57% ±<br>1.04%' |
| 'PLS-DA'    | '89.06% ±<br>1.15%'       | '88.24% ±<br>1.08%' | '88.08% ±<br>1.14%' | '87.99% ±<br>1.11%' | '87.83% ±<br>1.08%' | '87.54% ±<br>1.08%' | '87.13% ±<br>1.05%' |
| 'SVM'       | '85.65% ±<br>1.07%'       | '85.79% ±<br>1.08%' | '86.37% ±<br>1.17%' | '86.73% ±<br>1.07%' | '86.64% ±<br>1.06%' | '86.55% ±<br>1.05%' | '86.43% ±<br>1.04%' |
| 'RLR'       |                           | '80% ±<br>1.31%'    | '79.72% ±<br>1.38%' | '78.28% ±<br>1.35%' | '77.96% ±<br>1.43%' | '77.3% ±<br>1.25%'  | '77.12% ±<br>1.3%'  |
| 'kNN'       | '82% ± 1.27%'             |                     |                     |                     |                     |                     |                     |

| NPV        | mean NPV ± 95% CI   |                     |                     |                     |                     |                     |                     |
|------------|---------------------|---------------------|---------------------|---------------------|---------------------|---------------------|---------------------|
| Classifier | 20%                 | 30%                 | 40%                 | 50%                 | 60%                 | 70%                 | 80%                 |
|            | '87.93% ±<br>1.19%' | '87.78% ±<br>1.07%' | '87.27% ±<br>1.14%' | '87.35% ±<br>1.08%' | '86.96% ±<br>1.13%' | '86.17% ±<br>1.14%' | '86.37% ±<br>1.24%' |
| 'RF'       | '89.63% ±<br>0.99%' | '89.18% ±<br>1.05%' | '89.25% ±<br>1.03%' | '88.63% ±<br>1.05%' | '88.3% ±<br>1%'     | '88.39% ±<br>1.08%' | '88.14% ±<br>1.04%' |
| 'PLS-DA'   | '89.71% ±<br>1.15%' | '88.89% ±<br>1.08%' | '88.77% ±<br>1.14%' | '88.83% ±<br>1.11%' | '88.75% ±<br>1.08%' | '88.5% ±<br>1.08%'  | '88.09% ±<br>1.05%' |
| 'SVM'      | '86.78% ±<br>1.07%' | '86.81% ±<br>1.08%' | '87.44% ±<br>1.17%' | '87.9% ±<br>1.07%'  | '87.8% ±<br>1.06%'  | '87.6% ±<br>1.05%'  | '87.62% ±<br>1.04%' |
| 'RLR'      | '83.62% ±<br>1.27%' | '81.67% ±<br>1.31%' | '81.25% ±<br>1.38%' | '80.25% ±<br>1.35%' | '79.81% ±<br>1.43%' | '79.36% ±<br>1.25%' | '79.08% ±<br>1.3%'  |
| 'kNN'      |                     |                     |                     |                     |                     |                     |                     |

| F1         | mean F1 ± 95% CI    |                     |                     |                     |                     |                     |                     |
|------------|---------------------|---------------------|---------------------|---------------------|---------------------|---------------------|---------------------|
| Classifier | 20%                 | 30%                 | 40%                 | 50%                 | 60%                 | 70%                 | 80%                 |
|            | '83.5% ±<br>1.52%'  | '83.21% ±<br>1.37%' | '82.89% ±<br>1.42%' | '82.55% ±<br>1.41%' | '81.9% ±<br>1.49%'  | '81.1% ±<br>1.44%'  | '81.29% ±<br>1.6%'  |
| 'RF'       | '84.34% ±<br>1.47%' | '83.27% ±<br>1.52%' | '83.41% ±<br>1.65%' | '83.08% ±<br>1.62%' | '82.53% ±<br>1.56%' | '82.37% ±<br>1.66%' | '82.54% ±<br>1.5%'  |
| 'PLS-DA'   | '86.32% ±<br>1.49%' | '85.26% ±<br>1.39%' | '85.02% ±<br>1.47%' | '84.88% ±<br>1.43%' | '84.71% ±<br>1.39%' | '84.35% ±<br>1.39%' | '83.81% ±<br>1.37%' |
| 'SVM'      | '80.34% ±<br>1.56%' | '80.65% ±<br>1.53%' | '81.53% ±<br>1.64%' | '82.18% ±<br>1.51%' | '81.98% ±<br>1.52%' | '82% ±<br>1.51%'    | '81.78% ±<br>1.53%' |
| 'RLR'      | '76.48% ±<br>1.8%'  | '73.46% ±<br>1.91%' | '73.06% ±<br>1.99%' | '71.1% ±<br>2.02%'  | '69.94% ±<br>2.32%' | '69.81% ±<br>1.95%' | '69.4% ±<br>1.97%'  |
| 'kNN'      |                     |                     |                     |                     |                     |                     |                     |

| Chi-Squared | mean accuracy ± 95% CI |     |     |     |     |     |     |
|-------------|------------------------|-----|-----|-----|-----|-----|-----|
| Classifier  | 20%                    | 30% | 40% | 50% | 60% | 70% | 80% |

|          |                  |                  |                  |                  |                  |                  |                  |
|----------|------------------|------------------|------------------|------------------|------------------|------------------|------------------|
| 'RF'     | '78.35% ± 1.69%' | '78.47% ± 1.92%' | '77.71% ± 2.01%' | '78.53% ± 1.94%' | '76.82% ± 1.89%' | '76.88% ± 2%'    | '75.24% ± 1.98%' |
| 'PLS-DA' | '79.24% ± 1.69%' | '80.41% ± 1.59%' | '80.35% ± 1.55%' | '79.47% ± 1.6%'  | '80% ± 1.5%'     | '79.76% ± 1.62%' | '79.76% ± 1.65%' |
| 'SVM'    | '79.76% ± 1.68%' | '79.71% ± 1.67%' | '80.29% ± 1.73%' | '80.65% ± 1.6%'  | '79.59% ± 1.78%' | '79.71% ± 1.81%' | '78.94% ± 1.73%' |
| 'RLR'    | '77.59% ± 1.86%' | '76.71% ± 1.72%' | '76.65% ± 1.72%' | '78% ± 1.68%'    | '78.29% ± 1.72%' | '78.35% ± 1.67%' | '78% ± 1.72%'    |
| 'kNN'    | '61.94% ± 1.99%' | '61.12% ± 2.01%' | '59.71% ± 1.85%' | '58.94% ± 1.79%' | '58.47% ± 1.76%' | '58.65% ± 1.68%' | '58.06% ± 1.81%' |

| Recall Classifier | mean recall ± 95% CI |                  |                  |                  |                  |                  |                  |
|-------------------|----------------------|------------------|------------------|------------------|------------------|------------------|------------------|
|                   | 20%                  | 30%              | 40%              | 50%              | 60%              | 70%              | 80%              |
| 'RF'              | '84% ± 1.24%'        | '83.63% ± 1.64%' | '83.1% ± 1.79%'  | '83.89% ± 1.49%' | '82.49% ± 1.62%' | '82.41% ± 1.84%' | '81.22% ± 1.77%' |
| 'PLS-DA'          | '84.6% ± 1.27%'      | '85.48% ± 1.19%' | '85.44% ± 1.16%' | '84.8% ± 1.18%'  | '85.23% ± 1.1%'  | '85.03% ± 1.2%'  | '85.05% ± 1.21%' |
| 'SVM'             | '84.71% ± 1.42%'     | '84.5% ± 1.54%'  | '84.95% ± 1.61%' | '85.23% ± 1.47%' | '84.43% ± 1.62%' | '84.51% ± 1.65%' | '83.96% ± 1.56%' |
| 'RLR'             | '81.52% ± 2.01%'     | '81.11% ± 1.7%'  | '80.19% ± 1.98%' | '81.85% ± 1.81%' | '81.84% ± 1.84%' | '81.7% ± 1.92%'  | '81.63% ± 1.83%' |
| 'kNN'             | '68.37% ± 2.17%'     | '68.33% ± 2.08%' | '66.15% ± 2.18%' | '65.11% ± 2.37%' | '64.71% ± 2.18%' | '65.04% ± 2.19%' | '64.6% ± 2.13%'  |

| Precision Classifier | mean precision ± 95% CI |                  |                  |                  |                  |                  |                  |
|----------------------|-------------------------|------------------|------------------|------------------|------------------|------------------|------------------|
|                      | 20%                     | 30%              | 40%              | 50%              | 60%              | 70%              | 80%              |
| 'RF'                 | '85.23% ± 1.24%'        | '85.29% ± 1.5%'  | '84.76% ± 1.58%' | '85.28% ± 1.44%' | '84.23% ± 1.48%' | '83.98% ± 1.65%' | '82.97% ± 1.61%' |
| 'PLS-DA'             | '83.5% ± 1.62%'         | '84.21% ± 1.6%'  | '83.28% ± 1.62%' | '83.64% ± 1.58%' | '83.78% ± 1.59%' | '83.32% ± 1.73%' | '83.87% ± 1.59%' |
| 'SVM'                | '86.07% ± 1.32%'        | '85.82% ± 1.31%' | '86.37% ± 1.36%' | '86.71% ± 1.23%' | '85.93% ± 1.38%' | '86.09% ± 1.42%' | '85.62% ± 1.36%' |
| 'RLR'                | '84.44% ± 1.52%'        | '84.09% ± 1.42%' | '84% ± 1.38%'    | '85.26% ± 1.24%' | '85.43% ± 1.27%' | '85.22% ± 1.36%' | '85.3% ± 1.25%'  |
| 'kNN'                | '73.55% ± 2.1%'         | '73.36% ± 2.01%' | '71.87% ± 2.2%'  | '71.07% ± 2.12%' | '71.43% ± 1.9%'  | '70.98% ± 2.09%' | '70.88% ± 1.87%' |

| Specificity Classifier | mean specificity ± 95% CI |                  |                  |                  |                  |                  |                  |
|------------------------|---------------------------|------------------|------------------|------------------|------------------|------------------|------------------|
|                        | 20%                       | 30%              | 40%              | 50%              | 60%              | 70%              | 80%              |
| 'RF'                   | '86.87% ± 1.05%'          | '86.99% ± 1.17%' | '86.51% ± 1.24%' | '87% ± 1.19%'    | '85.98% ± 1.15%' | '86% ± 1.22%'    | '85.01% ± 1.22%' |
| 'PLS-DA'               | '87.71% ± 1.03%'          | '88.44% ± 0.95%' | '88.58% ± 0.93%' | '87.9% ± 0.98%'  | '88.25% ± 0.91%' | '88.14% ± 0.97%' | '88.11% ± 0.99%' |
| 'SVM'                  | '87.75% ± 1.04%'          | '87.71% ± 1.02%' | '88.07% ± 1.06%' | '88.29% ± 0.98%' | '87.64% ± 1.08%' | '87.71% ± 1.1%'  | '87.27% ± 1.05%' |
| 'RLR'                  | '86.41% ± 1.14%'          | '85.88% ± 1.05%' | '85.84% ± 1.06%' | '86.66% ± 1.04%' | '86.83% ± 1.06%' | '86.87% ± 1.03%' | '86.64% ± 1.06%' |
| 'kNN'                  | '76.9% ± 1.23%'           | '76.43% ± 1.25%' | '75.56% ± 1.15%' | '75.11% ± 1.1%'  | '74.88% ± 1.08%' | '74.95% ± 1.05%' | '74.64% ± 1.11%' |

| NPV Classifier | mean NPV ± 95% CI |                  |                  |                  |                  |                  |                 |
|----------------|-------------------|------------------|------------------|------------------|------------------|------------------|-----------------|
|                | 20%               | 30%              | 40%              | 50%              | 60%              | 70%              | 80%             |
| 'RF'           | '87.78% ± 1.05%'  | '87.94% ± 1.17%' | '87.57% ± 1.24%' | '87.86% ± 1.19%' | '87.06% ± 1.15%' | '87.02% ± 1.22%' | '86.1% ± 1.22%' |

|          |                  |                  |                  |                  |                  |                  |                  |
|----------|------------------|------------------|------------------|------------------|------------------|------------------|------------------|
|          |                  | '88.88% ± 0.95%' | '88.97% ± 0.93%' | '88.47% ± 0.98%' | '88.66% ± 0.91%' | '88.65% ± 0.97%' | '88.69% ± 0.99%' |
| 'PLS-DA' | '88.26% ± 1.03%' | '88.48% ± 1.02%' | '88.91% ± 1.06%' | '89.16% ± 0.98%' | '88.52% ± 1.08%' | '88.65% ± 1.1%'  | '88.26% ± 1.05%' |
| 'SVM'    | '88.55% ± 1.04%' | '87.02% ± 1.05%' | '87.03% ± 1.06%' | '87.93% ± 1.04%' | '88.08% ± 1.06%' | '88.05% ± 1.03%' | '87.95% ± 1.06%' |
| 'RLR'    | '87.41% ± 1.14%' | '78.77% ± 1.25%' | '77.62% ± 1.15%' | '77.09% ± 1.1%'  | '77.15% ± 1.08%' | '77.06% ± 1.05%' | '76.81% ± 1.11%' |
| 'kNN'    | '78.7% ± 1.23%'  |                  |                  |                  |                  |                  |                  |

| F1<br>Classifier | mean F1 ± 95% CI |                  |                  |                  |                  |                  |                  |
|------------------|------------------|------------------|------------------|------------------|------------------|------------------|------------------|
|                  | 20%              | 30%              | 40%              | 50%              | 60%              | 70%              | 80%              |
| 'RF'             | '83.6% ± 1.29%'  | '83.49% ± 1.51%' | '82.96% ± 1.58%' | '83.63% ± 1.5%'  | '82.24% ± 1.51%' | '82.27% ± 1.63%' | '81.05% ± 1.56%' |
| 'PLS-DA'         | '82.89% ± 1.49%' | '83.86% ± 1.42%' | '83.08% ± 1.43%' | '82.88% ± 1.46%' | '83.32% ± 1.4%'  | '82.88% ± 1.5%'  | '83.19% ± 1.44%' |
| 'SVM'            | '84.67% ± 1.28%' | '84.63% ± 1.29%' | '85.03% ± 1.36%' | '85.33% ± 1.23%' | '84.47% ± 1.41%' | '84.55% ± 1.44%' | '83.99% ± 1.35%' |
| 'RLR'            | '82.12% ± 1.62%' | '81.3% ± 1.51%'  | '80.95% ± 1.61%' | '82.25% ± 1.57%' | '82.37% ± 1.58%' | '82.58% ± 1.44%' | '82.13% ± 1.6%'  |
| 'kNN'            | '68.69% ± 1.78%' | '68.26% ± 1.79%' | '66.57% ± 1.67%' | '65.45% ± 1.84%' | '64.64% ± 1.75%' | '64.86% ± 1.74%' | '65.1% ± 1.68%'  |

| Variance<br>Accuracy | mean accuracy ± 95% CI |                  |                  |                  |                  |                  |                  |
|----------------------|------------------------|------------------|------------------|------------------|------------------|------------------|------------------|
|                      | 20%                    | 30%              | 40%              | 50%              | 60%              | 70%              | 80%              |
| 'RF'                 | '78.18% ± 2.02%'       | '77.71% ± 1.83%' | '76.88% ± 2.1%'  | '77.06% ± 1.78%' | '76.65% ± 1.8%'  | '76.24% ± 1.9%'  | '75.35% ± 2.11%' |
| 'PLS-DA'             | '77.06% ± 1.72%'       | '76.71% ± 1.78%' | '76.88% ± 1.66%' | '77.53% ± 1.57%' | '78.71% ± 1.57%' | '78.65% ± 1.47%' | '78.82% ± 1.55%' |
| 'SVM'                | '80.65% ± 1.55%'       | '78.71% ± 1.65%' | '78.12% ± 1.63%' | '79.29% ± 1.47%' | '78.12% ± 1.57%' | '77.94% ± 1.7%'  | '78.12% ± 1.7%'  |
| 'RLR'                | '76.18% ± 1.81%'       | '77.18% ± 1.9%'  | '77.88% ± 1.8%'  | '76.94% ± 1.65%' | '76.53% ± 1.51%' | '76.12% ± 1.59%' | '76% ± 1.75%'    |
| 'kNN'                | '61% ± 1.9%'           | '60.06% ± 2.04%' | '60.35% ± 1.57%' | '60.41% ± 1.82%' | '58.06% ± 1.68%' | '57.12% ± 1.79%' | '57.94% ± 1.82%' |

| Recall   | mean recall ± 95% CI |                  |                  |                  |                  |                  |                  |
|----------|----------------------|------------------|------------------|------------------|------------------|------------------|------------------|
|          | 20%                  | 30%              | 40%              | 50%              | 60%              | 70%              | 80%              |
| 'RF'     | '83.4% ± 1.68%'      | '83.28% ± 1.49%' | '82.82% ± 1.6%'  | '82.95% ± 1.36%' | '82.51% ± 1.45%' | '82.35% ± 1.41%' | '81.66% ± 1.59%' |
| 'PLS-DA' | '82.95% ± 1.31%'     | '82.72% ± 1.31%' | '82.87% ± 1.23%' | '83.39% ± 1.17%' | '84.26% ± 1.16%' | '84.18% ± 1.1%'  | '84.36% ± 1.14%' |
| 'SVM'    | '85.68% ± 1.16%'     | '84.23% ± 1.23%' | '83.68% ± 1.26%' | '84.49% ± 1.18%' | '83.58% ± 1.23%' | '83.33% ± 1.42%' | '83.38% ± 1.51%' |
| 'RLR'    | '81.7% ± 1.55%'      | '81.74% ± 1.82%' | '81.58% ± 1.86%' | '80.83% ± 1.67%' | '80.25% ± 1.49%' | '80.77% ± 1.62%' | '79.82% ± 1.83%' |
| 'kNN'    | '69.55% ± 1.94%'     | '68.7% ± 2.07%'  | '68.29% ± 1.86%' | '67.82% ± 2.12%' | '65.8% ± 2.05%'  | '64.85% ± 2.25%' | '65.71% ± 2.32%' |

| Precision | mean precision ± 95% CI |                  |                  |                  |                  |                  |                  |
|-----------|-------------------------|------------------|------------------|------------------|------------------|------------------|------------------|
|           | 20%                     | 30%              | 40%              | 50%              | 60%              | 70%              | 80%              |
| 'RF'      | '85.06% ± 1.5%'         | '84.67% ± 1.41%' | '83.96% ± 1.66%' | '84.3% ± 1.38%'  | '83.92% ± 1.35%' | '83.67% ± 1.54%' | '83.31% ± 1.61%' |
| 'PLS-DA'  | '79.9% ± 1.79%'         | '80.62% ± 1.78%' | '81.41% ± 1.71%' | '81.63% ± 1.66%' | '82.98% ± 1.48%' | '82.82% ± 1.45%' | '83.09% ± 1.59%' |

|       |                     |                     |                     |                     |                     |                     |                     |
|-------|---------------------|---------------------|---------------------|---------------------|---------------------|---------------------|---------------------|
| 'SVM' | '86.43% ±<br>1.19%' | '85.02% ±<br>1.24%' | '84.84% ±<br>1.23%' | '85.81% ±<br>1.07%' | '85.02% ±<br>1.21%' | '84.87% ±<br>1.29%' | '84.97% ±<br>1.3%'  |
| 'RLR' | '83.45% ±<br>1.41%' | '84.26% ±<br>1.57%' | '84.92% ±<br>1.42%' | '84.42% ±<br>1.31%' | '84.11% ±<br>1.17%' | '83.67% ±<br>1.26%' | '83.51% ±<br>1.43%' |
| 'kNN' | '71.81% ±<br>1.6%'  | '71.21% ±<br>1.89%' | '71.71% ±<br>1.53%' | '72.37% ±<br>1.81%' | '69.76% ±<br>1.83%' | '68.9% ±<br>1.97%'  | '68.96% ±<br>2.04%' |

| Specificity | mean specificity ± 95% CI |                     |                     |                     |                     |                     |                     |
|-------------|---------------------------|---------------------|---------------------|---------------------|---------------------|---------------------|---------------------|
| Classifier  | 20%                       | 30%                 | 40%                 | 50%                 | 60%                 | 70%                 | 80%                 |
| 'RF'        | '86.77% ±<br>1.24%'       | '86.49% ±<br>1.13%' | '86.03% ±<br>1.29%' | '86.13% ±<br>1.1%'  | '85.86% ±<br>1.12%' | '85.63% ±<br>1.17%' | '85.07% ±<br>1.3%'  |
| 'PLS-DA'    | '86.73% ±<br>1.03%'       | '86.32% ±<br>1.09%' | '86.4% ±<br>0.99%'  | '86.83% ±<br>0.95%' | '87.43% ±<br>0.97%' | '87.42% ±<br>0.9%'  | '87.61% ±<br>0.92%' |
| 'SVM'       | '88.28% ±<br>0.96%'       | '87.1% ±<br>1.02%'  | '86.74% ±<br>1.01%' | '87.48% ±<br>0.91%' | '86.76% ±<br>0.97%' | '86.69% ±<br>1.03%' | '86.79% ±<br>1.03%' |
| 'RLR'       | '85.52% ±<br>1.12%'       | '86.15% ±<br>1.16%' | '86.61% ±<br>1.11%' | '86.06% ±<br>1.03%' | '85.81% ±<br>0.93%' | '85.53% ±<br>0.98%' | '85.45% ±<br>1.09%' |
| 'kNN'       | '76.39% ±<br>1.16%'       | '75.81% ±<br>1.24%' | '75.98% ±<br>0.96%' | '76.04% ±<br>1.1%'  | '74.61% ±<br>1.02%' | '74.01% ±<br>1.11%' | '74.53% ±<br>1.14%' |

| NPV        | mean NPV ± 95% CI   |                     |                     |                     |                     |                     |                     |
|------------|---------------------|---------------------|---------------------|---------------------|---------------------|---------------------|---------------------|
| Classifier | 20%                 | 30%                 | 40%                 | 50%                 | 60%                 | 70%                 | 80%                 |
| 'RF'       | '87.71% ±<br>1.24%' | '87.39% ±<br>1.13%' | '86.84% ±<br>1.29%' | '87.06% ±<br>1.1%'  | '86.77% ±<br>1.12%' | '86.64% ±<br>1.17%' | '86.24% ±<br>1.3%'  |
| 'PLS-DA'   | '87.06% ±<br>1.03%' | '86.77% ±<br>1.09%' | '86.92% ±<br>0.99%' | '87.45% ±<br>0.95%' | '88% ±<br>0.97%'    | '87.98% ±<br>0.9%'  | '88.34% ±<br>0.92%' |
| 'SVM'      | '88.83% ±<br>0.96%' | '87.7% ±<br>1.02%'  | '87.51% ±<br>1.01%' | '88.27% ±<br>0.91%' | '87.65% ±<br>0.97%' | '87.63% ±<br>1.03%' | '87.75% ±<br>1.03%' |
| 'RLR'      | '86.38% ±<br>1.12%' | '87.18% ±<br>1.16%' | '87.62% ±<br>1.11%' | '87.21% ±<br>1.03%' | '86.93% ±<br>0.93%' | '86.61% ±<br>0.98%' | '86.52% ±<br>1.09%' |
| 'kNN'      | '77.16% ±<br>1.16%' | '76.79% ±<br>1.24%' | '77.18% ±<br>0.96%' | '77.89% ±<br>1.1%'  | '76.25% ±<br>1.02%' | '75.61% ±<br>1.11%' | '75.87% ±<br>1.14%' |

| F1         | mean F1 ± 95% CI    |                     |                     |                     |                     |                     |                     |
|------------|---------------------|---------------------|---------------------|---------------------|---------------------|---------------------|---------------------|
| Classifier | 20%                 | 30%                 | 40%                 | 50%                 | 60%                 | 70%                 | 80%                 |
| 'RF'       | '83.31% ±<br>1.59%' | '83.13% ±<br>1.38%' | '82.66% ±<br>1.52%' | '82.57% ±<br>1.37%' | '82.13% ±<br>1.44%' | '81.83% ±<br>1.49%' | '81.12% ±<br>1.62%' |
| 'PLS-DA'   | '79.81% ±<br>1.62%' | '80.34% ±<br>1.57%' | '80.82% ±<br>1.55%' | '81.05% ±<br>1.47%' | '82.38% ±<br>1.34%' | '82.2% ±<br>1.29%'  | '82.12% ±<br>1.49%' |
| 'SVM'      | '85.48% ±<br>1.16%' | '83.98% ±<br>1.25%' | '83.4% ±<br>1.26%'  | '84.24% ±<br>1.17%' | '83.31% ±<br>1.22%' | '83.14% ±<br>1.36%' | '83.36% ±<br>1.35%' |
| 'RLR'      | '81.57% ±<br>1.49%' | '82.02% ±<br>1.55%' | '82.17% ±<br>1.54%' | '81.36% ±<br>1.36%' | '80.76% ±<br>1.26%' | '81.14% ±<br>1.33%' | '80.45% ±<br>1.5%'  |
| 'kNN'      | '69.3% ±<br>1.72%'  | '68.44% ±<br>1.81%' | '68.27% ±<br>1.5%'  | '67.86% ±<br>1.78%' | '65.96% ±<br>1.65%' | '65.35% ±<br>1.87%' | '66.15% ±<br>1.82%' |
